# Supplementary material for: Reversible C–H bond silylation with a neutral silicon Lewis acid
Source: Royal Society of Chemistry journal article supplement (doi:10.1039/d3sc03488g), 2023-01-01
Supplement: d3sc03488g1.pdf [file d3sc03488g1.pdf]

## Content

|    |                                                                |    |
|----|----------------------------------------------------------------|----|
| 1  | Experimental Details – Materials and General Methods .....     | 2  |
| 2  | Comparison of pK <sub>a</sub> Values .....                     | 2  |
| 3  | C(sp <sup>2/3</sup> )-H Cleavage Experiments.....              | 3  |
| 4  | Determination of the Kinetic Isotope Effect.....               | 5  |
| 5  | Donor Induced Reversal of the Bond Cleavage.....               | 6  |
| 6  | Reactivity and Catalysis .....                                 | 8  |
| 7  | Computational Details .....                                    | 9  |
| 8  | Single Crystal X-Ray Diffraction (scXRD).....                  | 10 |
| 9  | References.....                                                | 12 |
| 10 | Spectra.....                                                   | 13 |
| 11 | Cartesian Coordinates of Computed Structures (XYZ Format)..... | 25 |

## 1 Experimental Details – Materials and General Methods

All used reagents and solvents were purchased from commercial sources. Unless otherwise noted, all manipulations were carried out under a dry nitrogen or argon atmosphere. Solvents were degassed prior to use with four freeze-pump-thaw cycles and were stored in sealed Schlenk ampulla over activated molecular sieve (3 or 4 Å, respectively) under a dry argon atmosphere. Liquid reactants were degassed for at least 10 min with a constant stream of dry argon through the fluid phase and were dried by storage over activated molecular sieve (3 or 4 Å, respectively). Solid reagents were dried and purified if necessary either by the application of vacuum and elevated temperature, or by sublimation under reduced pressure at elevated temperature. N-methylindole and N-methylpyrrole were filtered over silica prior to use.

All reactions on preparative scale were carried out in flame-dried standard laboratory glassware under a dry argon atmosphere using Schlenk line techniques and were permanently magnetically stirred. Syringes, magnetic stirring bars, and needles were dried and/or flushed with argon prior to use. Reaction on the NMR sample scale were done in dry *J. Young* NMR tubes.

Compounds sensitive to ambient conditions were handled and stored in a *Sylatech* glove box filled with dry nitrogen gas. Removal of solvents in *vacuo* was performed using a *Heidolph VV2000* rotary evaporator or a Schlenk line.

Literature-known compounds were synthesized following published procedures, which are cited (see below). Analytical data of known compounds were compared to data of the respective reference and were found to be consistent in all cases. Novel compounds were characterized to the reported structures to the best of our knowledge.

Nuclear magnetic resonance (NMR) spectra were collected with a *Bruker BZH 200/52*, a *Bruker Avance I 200*, a *Bruker Avance II 400*, or a *Bruker Avance III 600* spectrometer at 298 K unless otherwise noted. Measurements were partially carried out by the NMR facility of the Institute of Inorganic Chemistry of Heidelberg University.

Chemical shifts  $\delta$  are given in parts per million (ppm) relative to the tetramethylsilane resonance. Deuterated dichloromethane and chloroform were used as solvent, and the signal of  $\text{CHDCl}_2$  or  $\text{CHCl}_3$  was used for calibration of the spectra ( $\text{CD}_2\text{Cl}_2$ :  $^1\text{H}$ : 5.32 ppm,  $^{13}\text{C}$ : 53.84 ppm,  $\text{CDCl}_3$ :  $^1\text{H}$ : 7.26 ppm,  $^{13}\text{C}$ : 77.16 ppm).  $^1\text{H}$  and  $^{19}\text{F}$  NMR data is reported as follows: chemical shift  $\delta$  [ppm], multiplicity (s = singlet, br = broad singlet, d = doublet, t = triplet, q = quartet, quin = quintet, sext = sextet, sept = septet, m = multiplet, and combinations; pseudo-multiplicities are reported likewise), scalar spin-spin coupling constant [Hz] as  $^XJ_{AB}$  (if apparent: X = number of chemical bonds between coupled nuclei; A, B = coupled nuclei), integration value.  $^{13}\text{C}$  and  $^{29}\text{Si}$  spectra were recorded  $^1\text{H}$ -decoupled if not stated otherwise.  $^{13}\text{C}$  and  $^{29}\text{Si}$  data is reported as follows: chemical shift  $\delta$  [ppm], multiplicity (if apparent), scalar spin-spin coupling constant [Hz] as  $(^X)J_{(AB)}$ . NMR spectra were processed and plotted with *MestReNova 14.2*.

High resolution mass spectrometry (HR-MS) was conducted with the electrospray ionization method (ESI) on a *Bruker ApexQe hybrid 9.4 T FT-ICR*, carried out by the Mass Spectrometry Facility of the Institute of Organic Chemistry of the University of Heidelberg. Mass spectrometry data is reported as follows:  $m/z$  ratio (relative intensity) [assigned fragment] (for HR experiments: calculated exact mass).

Gas chromatography mass spectroscopy (GCMS) experiments were conducted utilizing helium as carrier gas on a *Thermo Fischer Scientific Ultra Trace* gas chromatograph equipped with a *TraceGOLD TG-1701MS* column (14% cyanopropylphenyl, 86% dimethylpolysiloxane, 30 m x 0.25 mm x 0.25  $\mu\text{m}$ ) and a *Thermo Fischer Scientific ISQ Single Quadrupole Mass Selective Detector*. Unless stated otherwise, the following column program was used: at a constant pressure of 50 kPa the initial temperature of 35 °C was held for 5 min after injection, then increased by 30 K/min to 250 °C, this temperature kept for 10 min before cooling to 150 °C at a rate of 25 K/min. Reported retention times refer to this program.

## 2 Comparison of $\text{pK}_a$ Values

To assess the possibility of pmp to deprotonate the substrates in the absence of a Lewis acid,  $\text{pK}_a$  values of the respective compounds were compared (listed in **Table S1**). Due to limited data for pmp, related N-methylpiperidine was considered, for which  $\text{pK}_a$  values in acetonitrile are in good agreement. Further comparison of the respective substrates with the amine reveals a difference of several orders of magnitude, rendering a non-assisted deprotonation highly implausible.

**Table S1.** Collected  $\text{pK}_a$  data for substrates, pmp, and related N-methylpiperidine in different solvents.

| Compound                                 | $\text{pK}_a$ ( $\text{H}_2\text{O}$ ) | $\text{pK}_a$ (DMSO)           | $\text{pK}_a$ ( $\text{CH}_3\text{CN}$ ) | $\text{pK}_a$ (THF)                   |
|------------------------------------------|----------------------------------------|--------------------------------|------------------------------------------|---------------------------------------|
| pentamethylpiperidine (pmp) (protonated) |                                        |                                | 18.2 <sup>1</sup>                        |                                       |
| N-methylpiperidine (protonated)          | 10.12, <sup>3</sup>                    | 8.4 ( $\pm 1.2$ ) <sup>2</sup> | 18.2 <sup>2, 4</sup>                     | 12.9 <sup>2, 4</sup>                  |
| N-methylindole                           |                                        |                                |                                          | 38.1 <sup>5</sup> (C <sup>2</sup> -H) |
| N-methylpyrrole                          |                                        |                                |                                          | 39.5 <sup>5</sup> (C <sup>2</sup> -H) |
| thiophene                                |                                        |                                |                                          | 33.0 <sup>5</sup> (C <sup>2</sup> -H) |
| phenylacetylene                          | 23.2 <sup>6</sup>                      | 28.7 <sup>7</sup>              |                                          |                                       |

### 3 C(sp<sup>2</sup>)-H Cleavage Experiments

General Procedure (GP) for the synthesis of silicates [pmpH][2x]:

In a *J. Young* type NMR tube (NMR scale), a crimp vial, or a Schlenk-tube, **1** (1.0 eq., synthesized according to literature known procedure<sup>8</sup>), substrate (1.0 eq.) and pmp (1.0 eq.) were dissolved in CD<sub>2</sub>Cl<sub>2</sub> (0.45 mL, NMR scale) or CH<sub>2</sub>Cl<sub>2</sub> (0.1 M), sealed, and allowed to react at the specified temperature. After the reaction proceeded, the mixture was concentrated in *vacuo* and the solid/viscous residue layered with benzene (or toluene). The mixture was shaken and allowed to settle. The solvent was separated from the residue and the step repeated two times. The residue was dried in *vacuo*.



Remarks on NMR characterization: Data reported is in part taken from spectra obtained from reaction mixtures. While the NMR data is generally consistent with the isolated substances, we found occasionally minor variation in shift and multiplicity, that were neglectable for most resonances but pronounced for the NH <sup>1</sup>H-resonance (br or t, varying chemical shift).

#### [pmpH][2a]

GP: Reaction was kept for 24 h at rt, yielding colorless crystals (182 mg, 87%; NMR scale 16 mg, 92%) suitable for scXRD (see section 7). When conducted in toluene as solvent, direct crystallization from the reaction mixture was observed.

<sup>1</sup>H NMR (600 MHz, CD<sub>2</sub>Cl<sub>2</sub>) δ 7.90 (d, <sup>3</sup>J<sub>HH</sub> = 8.0 Hz, 1H, **H<sup>7</sup>**), 7.35 (s, 1H, **H<sup>4</sup>**), 7.27 (d, <sup>3</sup>J<sub>HH</sub> = 8.1 Hz, 1H, **H<sup>10</sup>**), 7.14 (t, <sup>3</sup>J<sub>HH</sub> = 7.0 Hz, 1H, **H<sup>9</sup>**), 7.01 (t, <sup>3</sup>J<sub>HH</sub> = 7.5 Hz, 1H, **H<sup>8</sup>**), 3.93 (t, <sup>1</sup>J<sub>NH</sub> = 49 Hz, 1H, **NH**), 3.73 (s, 3H, indole-NCH<sub>3</sub> (**H<sup>6</sup>**)), 2.61 (d, *J* = 5.8 Hz, 3H, pmp-NCH<sub>3</sub>), 1.84 (d, *J* = 14.8 Hz, 2H, **CH<sub>2</sub>**), 1.78 – 1.59 (m, 2H, **CH<sub>2</sub>**), 1.51 (t, *J* = 14.0 Hz, 2H, **CH<sub>2</sub>**), 1.28 (s, 6H, C(**CH<sub>3</sub>**)), 1.27 (s, 6H, C(**CH<sub>3</sub>**)).



<sup>13</sup>C NMR [<sup>13</sup>C, <sup>1</sup>H-<sup>13</sup>C-HSQC, <sup>1</sup>H-<sup>13</sup>C-HMBC] (151 MHz, CD<sub>2</sub>Cl<sub>2</sub>) δ 140.2 (**C<sup>4</sup>**), 138.9, 134.0, 129.3, 124.2 (**C<sup>7</sup>**), 121.0 (**C<sup>9</sup>**), 119.5 (**C<sup>8</sup>**), 111.3, 109.4 (**C<sup>10</sup>**), 67.6 (pmp C(CH<sub>3</sub>)<sub>2</sub>), 39.0 (pmp β-C), 33.1 (indole NCH<sub>3</sub>, **C<sup>6</sup>**), 31.0 (pmp CH<sub>3</sub>), 30.6 (pmp NCH<sub>3</sub>), 19.9 (pmp CH<sub>3</sub>), 15.8 (pmp γ-C).

<sup>19</sup>F NMR (376 MHz, CD<sub>2</sub>Cl<sub>2</sub>) δ -147.4 (dd, <sup>3</sup>J<sub>FF</sub> = 23.7, <sup>4</sup>J<sub>FF</sub> = 6.0 Hz, 2F), -148.7 (m, 2F), -162.4 (t, <sup>3</sup>J<sub>FF</sub> = 21.6 Hz, 2F), -167.1 (m, 4F), -170.3 (dt, <sup>3</sup>J<sub>FF</sub> = 21.4, <sup>4</sup>J<sub>FF</sub> = 7.7 Hz, 2F), -172.9 (dt, <sup>3</sup>J<sub>FF</sub> = 21.4, <sup>4</sup>J<sub>FF</sub> = 8.0 Hz, 2F), -176.4 (td, <sup>3</sup>J<sub>FF</sub> = 21.5, <sup>4</sup>J<sub>FF</sub> = 7.3 Hz, 2F), -177.7 (td, <sup>3</sup>J<sub>FF</sub> = 21.5, <sup>4</sup>J<sub>FF</sub> = 7.9 Hz, 2F).

<sup>29</sup>Si NMR (119 MHz, CD<sub>2</sub>Cl<sub>2</sub>) δ -94.6.

HRMS ESI<sup>-</sup> (in CH<sub>2</sub>Cl<sub>2</sub>) (*m/z*) calc. for [C<sub>33</sub>H<sub>8</sub>F<sub>18</sub>N<sub>3</sub>O<sub>2</sub>Si]<sup>-</sup> [M]<sup>-</sup>, 848.0104; found 848.0104 (87%), deviation -0.1 ppm.

Elemental analysis calc. C 51.40%, H 3.01%, N, 5.58%. found C 51.09%, H 3.13%, N 5.66%.

#### [pmpH][2b]

GP: Reaction was kept for 48 h at rt, yielding a pale red, viscous oil. Upon grinding with a spatula, first a viscous solid was obtained, ultimately turning into a sticky, off-white powder (101 mg, 72%; NMR scale 18 mg, 80%). The reaction was also found to be successful when conducted neat (xs. N-methylpyrrole), forming a pale red to brown oil directly from the reaction mixture. Minor unassigned trace impurities were detected, possibly originating from double activation or side reactivities with the fluorinated ligand, as reported for related species [1-H]<sup>-88</sup>. Extensive extraction with benzene diminished the proportion of impurity but resulted in disproportionate yield loss.

<sup>1</sup>H NMR (600 MHz, CD<sub>2</sub>Cl<sub>2</sub>) δ 6.84 (t, *J* = 1.8 Hz, 1H, **H<sup>1</sup>**), 6.60 (t, <sup>3</sup>J<sub>HH</sub> = 2.2 Hz, 1H, **H<sup>2</sup>**), 6.32 (t, <sup>3</sup>J<sub>HH</sub> = 1.9 Hz, 1H, **H<sup>4</sup>**), 4.35 (t, <sup>1</sup>J<sub>NH</sub> = 49 Hz, 1H, **NH**), 3.61 (s, **H<sup>6</sup>**), 2.79 (d, *J* = 5.8 Hz, 3H, pmp-NCH<sub>3</sub>), 1.94 (d, *J* = 14.3 Hz, 2H, **CH<sub>2</sub>**), 1.82 – 1.63 (m, 4H, **CH<sub>2</sub>**), 1.40 (s, 6H, C(**CH<sub>3</sub>**)), 1.38 (s, 6H, C(**CH<sub>3</sub>**)).

<sup>13</sup>C NMR [<sup>13</sup>C, <sup>1</sup>H-<sup>13</sup>C-HSQC, <sup>1</sup>H-<sup>13</sup>C-HMBC] (151 MHz, CD<sub>2</sub>Cl<sub>2</sub>) δ 132.0 (**C<sup>1</sup>**), 122.1 (**C<sup>2</sup>**), 119.9 (**C<sup>3</sup>**), 116.9 (**C<sup>4</sup>**), 67.6 (pmp C(CH<sub>3</sub>)<sub>2</sub>), 39.0 (pmp β-C), 36.1 (pyrrole-NCH<sub>3</sub> (**C<sup>6</sup>**)), 30.9 (pmp CH<sub>3</sub>), 30.7 (pmp NCH<sub>3</sub>), 20.0 (pmp CH<sub>3</sub>), 15.9 (pmp γ-C).



<sup>19</sup>F NMR (376 MHz, CD<sub>2</sub>Cl<sub>2</sub>) δ -147.0 (dd, <sup>3</sup>J<sub>FF</sub> = 23.6 Hz, <sup>4</sup>J<sub>FF</sub> = 5.8 Hz, 2F), -148.9 (m, 2F), -162.7 (t, <sup>3</sup>J<sub>FF</sub> = 21.5 Hz, 2F), -167.2 (t, <sup>3</sup>J<sub>FF</sub> = 21.7 Hz, 2F), -167.3 (m, 2F), -170.5 (dt, <sup>3</sup>J<sub>FF</sub> = 21.5 Hz, <sup>4</sup>J<sub>FF</sub> = 7.8 Hz, 2F), -173.2 (dt, <sup>3</sup>J<sub>FF</sub> = 21.4 Hz, <sup>4</sup>J<sub>FF</sub> = 8.0 Hz, 2F), -176.7 (td, <sup>3</sup>J<sub>FF</sub> = 21.5 Hz, <sup>4</sup>J<sub>FF</sub> = 7.3 Hz, 2F), -178.2 (td, <sup>3</sup>J<sub>FF</sub> = 21.4 Hz, <sup>4</sup>J<sub>FF</sub> = 8.1 Hz, 2F).

<sup>29</sup>Si NMR (119 MHz, CD<sub>2</sub>Cl<sub>2</sub>) δ -95.8.

HRMS ESI<sup>-</sup> (in CH<sub>2</sub>Cl<sub>2</sub>) (*m/z*) calc. for [C<sub>29</sub>H<sub>6</sub>F<sub>18</sub>N<sub>3</sub>O<sub>2</sub>Si]<sup>-</sup> [M]<sup>-</sup>, 797.9947; found 77.9955 (20%), deviation -1.0 ppm.

§ Of note, we observed traces of the dianion [pmpH]<sub>2</sub>[Si<sub>2</sub>(am<sup>F</sup>ph<sup>F</sup>)<sub>3</sub>] upon gas-diffusion of *n*-pentane into a solution of the title compound in CH<sub>2</sub>Cl<sub>2</sub>. While a clear proceeding of this reaction was not clarified yet, it might indicate an exchange of the carbanionic heteroaryl group and the ligand between silicates (e.g., 3 [Si(am<sup>F</sup>ph<sup>F</sup>)<sub>2</sub>-R]<sup>-</sup> → [R<sub>3</sub>Si(am<sup>F</sup>ph<sup>F</sup>)]<sup>-</sup> + [Si<sub>2</sub>(am<sup>F</sup>ph<sup>F</sup>)<sub>3</sub>]<sup>2-</sup>).

## SUPPORTING INFORMATION

### [pmpH][2c]

**GP** (NMR scale): Reaction was kept for 72 h at rt, yielding a pale red, viscous oil (22 mg, 68%). Upon grinding with a spatula, a viscous solid was obtained at first, ultimately turning into a sticky, off-white powder.

**<sup>1</sup>H NMR** (600 MHz, CD<sub>2</sub>Cl<sub>2</sub>) δ 7.44 – 7.37 (m, 4H, **H<sup>Ph</sup>**), 7.30 (br, 1H, **H<sup>I</sup>**), 7.21 (m, 1H, **H<sup>Ph</sup>**), 7.10 (t, <sup>3</sup>J<sub>HH</sub> = 2.4 Hz, 1H, **H<sup>P</sup>**), 6.53 (br, 1H, **H<sup>A</sup>**),

4.61 (t, <sup>1</sup>J<sub>NH</sub> = 45 Hz, 1H, **NH**), 2.81 (d, J = 5.5 Hz, 3H, pmp-NCH<sub>3</sub>), 1.94 (d, J = 14.5 Hz, 2H, **CH<sub>2</sub>**), 1.83 – 1.64 (m, 4H, **CH<sub>2</sub>**), 1.43 (s, 6H, C(**CH<sub>3</sub>**)), 1.38 (s, 6H, C(**CH<sub>3</sub>**)).

**<sup>13</sup>C NMR** [<sup>13</sup>C, <sup>1</sup>H-<sup>13</sup>C-HSQC, <sup>1</sup>H-<sup>13</sup>C-HMBC] (151 MHz, CD<sub>2</sub>Cl<sub>2</sub>) δ 140.7 (**C<sup>6</sup>**), 129.4 (**C<sup>Ph</sup>** (**C<sup>8</sup>**)), 127.9 (**C<sup>1</sup>**), 125.2 (**C<sup>7</sup>**), 122.1 (**C<sup>3</sup>**), 120.2 (**C<sup>Ph</sup>** (**C<sup>9</sup>**)), 119.1 (**C<sup>2</sup>**), 118.4 (**C<sup>4</sup>**), 67.8 (pmp C(CH<sub>3</sub>)<sub>2</sub>), 39.2 (pmp β-C), 31.2 (pmp CH<sub>3</sub>), 30.8 (pmp NCH<sub>3</sub>), 20.0 (pmp CH<sub>3</sub>), 15.8 (pmp γ-C).

**<sup>19</sup>F NMR** (376 MHz, CD<sub>2</sub>Cl<sub>2</sub>) δ -146.9 (dd, <sup>3</sup>J<sub>FF</sub> = 23.7 Hz, <sup>4</sup>J<sub>FF</sub> = 5.6 Hz, 2F), -148.9 (m, 2F), -162.6 (t, <sup>3</sup>J<sub>FF</sub> = 21.6 Hz, 2F), -167.1 (t, <sup>3</sup>J<sub>FF</sub> = 22.6 Hz, 2F), -167.3 (m, 2F), -170.4 (dt, <sup>3</sup>J<sub>FF</sub> = 21.2 Hz, <sup>4</sup>J<sub>FF</sub> = 7.8 Hz, 2F), -172.9 (dt, <sup>3</sup>J<sub>FF</sub> = 21.5 Hz, <sup>4</sup>J<sub>FF</sub> = 8.0 Hz, 2F), -176.5 (td, <sup>3</sup>J<sub>FF</sub> = 21.5 Hz, <sup>4</sup>J<sub>FF</sub> = 7.5 Hz, 2F), -178.0 (td, <sup>3</sup>J<sub>FF</sub> = 21.5 Hz, <sup>4</sup>J<sub>FF</sub> = 7.9 Hz, 2F).

**<sup>29</sup>Si NMR** (119 MHz, CD<sub>2</sub>Cl<sub>2</sub>) δ -96.0.

**HRMS ESI-** (in CH<sub>2</sub>Cl<sub>2</sub>) (*m/z*) calc. for [C<sub>34</sub>H<sub>8</sub>F<sub>18</sub>N<sub>3</sub>O<sub>2</sub>Si]<sup>-</sup> [M]<sup>-</sup>, 860.0104; found 860.0108 (38%), deviation -0.5 ppm.



### [pmpH][2d]

**GP** (NMR scale): Reaction was kept for 24 h at rt, yielding a colorless solid (37 mg, 91%).

**<sup>1</sup>H NMR** (600 MHz, CD<sub>2</sub>Cl<sub>2</sub>) δ 7.45 (m, 2H, *meta*-C<sub>Ph</sub>H / **H<sup>f</sup>**), 7.28 (m, 3H, *ortho*-C<sub>Ph</sub>H / **H<sup>i</sup>** & *para*-C<sub>Ph</sub>H / **H<sup>e</sup>**), 4.58 (t, <sup>1</sup>J<sub>NH</sub> = 49 Hz, 1H, **NH**), 2.80 (d, J = 5.2 Hz, 3H, pmp-NCH<sub>3</sub>), 1.92 (d, J = 14.6 Hz, 2H, **CH<sub>2</sub>**), 1.82 – 1.61 (m, 4H, **CH<sub>2</sub>**), 1.42 (s, 6H, C(**CH<sub>3</sub>**)), 1.36 (s, 6H, C(**CH<sub>3</sub>**)).

**<sup>13</sup>C NMR** [<sup>13</sup>C, <sup>1</sup>H-<sup>13</sup>C-HSQC, <sup>1</sup>H-<sup>13</sup>C-HMBC] (151 MHz, CD<sub>2</sub>Cl<sub>2</sub>) δ 131.8 (**C<sup>Ph</sup>**), 128.2 (**C<sup>Ph</sup>**), 128.1 (**C<sup>Ph</sup>**), 122.6 (**C<sup>Ph</sup>**), 112.5 (**C<sup>sp</sup>**), 101.6 (**C<sup>sp</sup>**), 67.1 (pmp C(CH<sub>3</sub>)<sub>2</sub>), 38.6 (pmp β-C), 30.5 (pmp CH<sub>3</sub>), 30.3 (pmp NCH<sub>3</sub>), 19.6 (pmp CH<sub>3</sub>), 15.4 (pmp γ-C).

**<sup>19</sup>F NMR** (565 MHz, CD<sub>2</sub>Cl<sub>2</sub>) δ -147.2 (dd, <sup>3</sup>J<sub>FF</sub> = 23.3, <sup>4</sup>J<sub>FF</sub> = 5.6 Hz, 2F), -148.8 (m, 2F), -161.5 (t, <sup>3</sup>J<sub>FF</sub> = 21.5 Hz, 2F), -166.3 (t, <sup>3</sup>J<sub>FF</sub> = 22.2 Hz, 2F), -166.8 (t, <sup>3</sup>J<sub>FF</sub> = 19.5 Hz, 2F), -169.92 (d, J = 21.3 Hz, 2F), -171.78 (dt, <sup>3</sup>J<sub>FF</sub> = 21.3 Hz, <sup>4</sup>J<sub>FF</sub> = 7.6 Hz, 2F), -175.5 (td, <sup>3</sup>J<sub>FF</sub> = 21.4 Hz, <sup>4</sup>J<sub>FF</sub> = 6.6 Hz, 2F), -176.7 (td, <sup>3</sup>J<sub>FF</sub> = 21.6 Hz, <sup>4</sup>J<sub>FF</sub> = 7.3 Hz, 2F).

**<sup>29</sup>Si NMR** (119 MHz, CD<sub>2</sub>Cl<sub>2</sub>) δ -108.4.

**HRMS ESI-** (in CH<sub>2</sub>Cl<sub>2</sub>) (*m/z*) calc. for [C<sub>32</sub>H<sub>5</sub>F<sub>18</sub>N<sub>2</sub>O<sub>2</sub>Si]<sup>-</sup> [M]<sup>-</sup>, 818.9838; found 818.9840 (38%), deviation -0.2 ppm.



### [pmpH][2e]

**GP** (NMR scale): Neat thiophene (0.4 mL) was used instead of CD<sub>2</sub>Cl<sub>2</sub> as solvent, resulting in a pale red to brown oil directly from the reaction mixture. Reaction was kept for 48 h at 80 °C, yielding a pale red, viscous oil (24 mg, 78%). Upon grinding with a spatula, a viscous solid was obtained at first, ultimately turning into a sticky, off-white powder.

**<sup>1</sup>H NMR** (400 MHz, CD<sub>2</sub>Cl<sub>2</sub>) δ 7.55 (dd, <sup>3</sup>J<sub>HH</sub> = 4.7, <sup>4</sup>J<sub>HH</sub> = 1.0 Hz, 1H, **H<sup>1</sup>**), 7.44 (dd, <sup>3</sup>J<sub>HH</sub> = 3.3, <sup>4</sup>J<sub>HH</sub> = 1.1 Hz, 1H, **H<sup>3</sup>**), 7.13 (dd, <sup>3</sup>J<sub>HH</sub> = 4.7, <sup>4</sup>J<sub>HH</sub> = 3.4 Hz, 1H, **H<sup>2</sup>**), 4.53 (br, 1H, **NH**), 2.83 (d, J = 5.8 Hz, 3H, pmp-NCH<sub>3</sub>), 1.96 (d, J = 14.0 Hz, 2H, **CH<sub>2</sub>**), 1.86 – 1.64 (m, 4H, **CH<sub>2</sub>**), 1.43 (s, 6H, C(**CH<sub>3</sub>**)), 1.39 (s, 6H, C(**CH<sub>3</sub>**)).

**<sup>13</sup>C NMR** [<sup>13</sup>C, <sup>1</sup>H-<sup>13</sup>C-HSQC, <sup>1</sup>H-<sup>13</sup>C-HMBC, DEPT-135] (101 MHz, CD<sub>2</sub>Cl<sub>2</sub>) δ 142.3 (**C<sup>4</sup>**), 137.3 (**C<sup>3</sup>**), 132.0 (**C<sup>1</sup>**), 128.4 (**C<sup>2</sup>**), 67.6 (pmp C(CH<sub>3</sub>)<sub>2</sub>), 39.1 (pmp β-C), 31.0 (pmp CH<sub>3</sub>), 30.7 (pmp NCH<sub>3</sub>), 20.0 (pmp CH<sub>3</sub>), 15.9 (pmp γ-C).

**<sup>19</sup>F NMR** (376 MHz, CD<sub>2</sub>Cl<sub>2</sub>) δ -147.1 (dd, <sup>3</sup>J<sub>FF</sub> = 23.2, <sup>4</sup>J<sub>FF</sub> = 5.9 Hz, 2F), -148.9 (m, 2F), -162.0 (t, <sup>3</sup>J<sub>FF</sub> = 21.5 Hz, 2F), -166.8 (t, <sup>3</sup>J<sub>FF</sub> = 22.3 Hz, 2F), -167.1 (m, 2F), -170.1 (dt, <sup>3</sup>J<sub>FF</sub> = 21.5 Hz, <sup>4</sup>J<sub>FF</sub> = 7.6 Hz, 2F), -172.31 (dt, <sup>3</sup>J<sub>FF</sub> = 21.4 Hz, <sup>4</sup>J<sub>FF</sub> = 7.9 Hz, 2F), -175.9 (td, <sup>3</sup>J<sub>FF</sub> = 21.4 Hz, <sup>4</sup>J<sub>FF</sub> = 7.0 Hz, 2F), -177.2 (td, <sup>3</sup>J<sub>FF</sub> = 21.4 Hz, <sup>4</sup>J<sub>FF</sub> = 7.5 Hz, 2F).

**<sup>29</sup>Si NMR** (79 MHz, CD<sub>2</sub>Cl<sub>2</sub>) δ -99.8.

**HRMS ESI-** (in CH<sub>2</sub>Cl<sub>2</sub>) (*m/z*) calc. for [C<sub>28</sub>H<sub>3</sub>F<sub>18</sub>N<sub>2</sub>O<sub>2</sub>SSi]<sup>-</sup> [M]<sup>-</sup>, 800.9403; found 800.9396 (100%), deviation 0.8 ppm.



#### 4 Determination of the Kinetic Isotope Effect

For the determination of the kinetic isotope effect N-methylindole was considered as a suitable substrate due to a fast and clean reaction and its regioselectivity (only reactivity in 3-position observed). 3-deutero-N-methylindole was prepared according to a literature known procedure (> 97% deuteration in 3-position).<sup>9</sup>

In a *J Young* type NMR tube, equimolar amounts of 3-deutero-N-methylindole and N-methylindole (1.0 eq., 80 μmol, each) were dissolved in CD<sub>2</sub>Cl<sub>2</sub> together with pmp (1.0 eq.) and hexamethylbenzene as internal standard (1.0 eq.). The mixture was analyzed by NMR spectroscopy. <sup>1</sup>H NMR experiments were conducted with a relaxation time of 60 s, to preclude misleading quantifications caused by incomplete integration data. Subsequently, **1** (1.0 eq.) was added and the reaction allowed to proceed for 12 h at rt. <sup>19</sup>F and <sup>29</sup>Si NMR spectroscopy confirmed full conversion of the FLP **1**/pmp. Assuming that the consumed substrate was fully converted to the respective silicate, a KIE ( $k_H/k_D$ ) can be calculated from this data as shown below (**Scheme S1**, uncertainty calculated assuming an integral error of 0.01 with *Gaussian* error propagation).

##### Calculation of the KIE

When using an intermolecular experiment, commonly equimolar amounts of deuterated and protonated substrate are reacted and the KIE is calculated as a ratio of the yield derived from the protonated to the deuterated form.<sup>10</sup> The present experiment was planned accordingly, yet the exact ratio of protonated to deuterated form was determined using NMR integrals and the calculation therefore modified accordingly, using the yields referenced against the initial substrate (formula **(I)**, **Scheme S1**).

$$\begin{aligned}
 \text{(I)} \quad KIE &= \frac{k_H}{k_D} = \frac{[P_H]_{t>0}}{[S_H]_{t=0}} \bigg/ \frac{[P_D]_{t>0}}{[S_D]_{t=0}} = \frac{[P_H]_{t>0}}{[S_H]_{t=0}} \cdot \frac{[S_D]_{t=0}}{[P_D]_{t>0}} \\
 \text{(II)} \quad KIE &= \frac{[S_H]_{t=0} - [S_H]_{t>0}}{[S_H]_{t=0}} \cdot \frac{[S_{H+D}]_{t=0} - [S_H]_{t=0}}{([S_{H+D}]_{t=0} - [S_{H+D}]_{t>0}) - ([S_H]_{t=0} - [S_H]_{t>0})} \\
 \text{(i)} \quad [S_D]_{t=0} &= [S_{H+D}]_{t=0} - [S_H]_{t=0} \\
 \text{(ii)} \quad [P_H]_{t>0} &= [S_H]_{t=0} - [S_H]_{t>0} \\
 \text{(iii)} \quad [P_D]_{t>0} &= [P_{H+D}]_{t>0} - [P_H]_{t>0} \\
 &= ([S_{H+D}]_{t=0} - [S_{H+D}]_{t>0}) - ([S_H]_{t=0} - [S_H]_{t>0})
 \end{aligned}$$

**Scheme S1.** Formulas for the calculation of the KIE.  $[S_{HD}]_t$  – concentration of protonated (H) or deuterated substrate (D) at given time x;  $[S_{H+D}]_t$  – total, combined concentration of protonated and deuterated substrate at given time t; time t = 0 – prior to reaction, before the addition of Lewis acid; time t > 0 – after reaction proceeded.

Calibrating the spectra to the solvent signal and the integral for the internal standard at a constant value, the signals at 6.5 ppm, 7.2 ppm and 7.6 ppm were integrated, as all were judged sufficiently separated from neighboring resonances prior to and after the reaction proceeded. The resonance at 6.5 ppm represents the hydrogen involved in the cleavage process, the resonances at 7.2 ppm and 7.6 ppm both serve as estimation for the combined concentration of N-methylindole substrate (deuterated and protonated) and were averaged for the final KIE assessment. Relative values of the integrals are listed in **Table S2**, corresponding spectra are shown in **Figure S1**.

**Table S2.** Resonances and integrals used for the assessment of the KIE. Signals were integrated in a range of ±0.1 ppm when no neighboring signal was found in this range or otherwise to the maximal possible range.

|          | Integrated Signal [ppm]          | Integral Value | Proportional To   |
|----------|----------------------------------|----------------|-------------------|
| t = 0    |                                  | 1.088          | $[S_H]_{t=0}$     |
| t = 12 h | 6.5 ( $H^{\beta}$ of substrate)  | 0.378          | $[S_H]_{t>0}$     |
| t = 0    |                                  | 2.147          | $[S_{H+D}]_{t=0}$ |
| t = 12 h | 7.6 ( $H^{\alpha}$ of substrate) | 1.240          | $[S_{H+D}]_{t>0}$ |

The final KIE was calculated utilizing formula **(II)** (**Scheme S1**). Instead of the molar concentrations, integral values of respective <sup>1</sup>H NMR signals were utilized directly (**Table S2**), which are proportional to the molar concentrations. The latter might be derived through multiplication with the concentration of the internal standard.

Ultimately, a KIE of 3.5 can be assessed. It shall be noted that the present experiment is intended to give qualitative proof for a direct involvement of the C-H/D bond in the rate-determining step and does not serve as exact quantification of kinetic data. An assumed integral uncertainty of 0.01 propagates to an uncertainty of ±0.7 of the final KIE (not considering used approximations and possible systematic errors).



**Figure S1.**  $^1\text{H}$  NMR spectra with the respective integrals for the determination of the kinetic isotope effect in the CH bond cleavage of N-methylindole by **1** and pmp.

## 5 Donor Induced Reversal of the Bond Cleavage

To a solution of [pmpH][**2a**] (11 mg) in  $\text{CD}_2\text{Cl}_2$  (0.45 mL) was added an equimolar amount of 1,3-Dimethyl-2-imidazolidinone (DMI) and the mixture was monitored using NMR spectroscopy. After 48 h at rt signals of N-methylindole in  $^1\text{H}$  NMR spectra indicated a donor induced reversal of the bond cleavage (31%<sup>§</sup>). Heating of the mixture to 60 °C accelerated the process and led to 91%<sup>§</sup> conversion of the initial silicate after 40 h (**Figure S2**).

Apart from N-methylindole, **1**-DMI was identified as main product through comparison of  $^{19}\text{F}$  NMR spectra (**Figure S3** and paragraph below). Minor unassigned signals (< 5%, assuming a structural relation to the am<sup>F</sup>ph<sup>F</sup> ligand system) are partially also found upon addition of DMI to unbound **1** and might correspond to a possible bis-adduct.

### 1-DMI

To a solution of unbound **1** (13 mg) in  $\text{CD}_2\text{Cl}_2$  was added 1 eq. DMI. NMR spectroscopy indicated adduct formation. The connectivity of the adduct was further confirmed by scXRD analysis of poor-quality crystals that formed upon gas diffusion of *n*-pentane into the reaction mixture (see **Figure S5**, full refinement prevented by problems related to superstructures). Yield was not determined.

**$^1\text{H}$  NMR** (600 MHz,  $\text{CD}_2\text{Cl}_2$ )  $\delta$  3.55 (br, 4H,  $\text{CH}_2$ ), 2.81 (s, 6H,  $\text{CH}_3$ ).

**$^{13}\text{C}$  NMR** (151 MHz,  $\text{CD}_2\text{Cl}_2$ )  $\delta$  45.9 ( $\text{CH}_3$ ), 31.4 (br,  $\text{CH}_2$ ).

**CO** signal was not detected.

**$^{19}\text{F}$  NMR** (565 MHz,  $\text{CD}_2\text{Cl}_2$ )  $\delta$  -147.3 (br, 2F), -148.4 (br, 2F), -158.9 (t,  $^3J_{\text{FF}} = 21.5$  Hz, 2F), -164.9 (br, 2F), -165.3 (br, 2F), -167.8 (dd,  $^3J_{\text{FF}}$ ,  $^4J_{\text{FF}} = 21.1$ , 9.1 Hz, 2F), -170.0 (dd,  $^3J_{\text{FF}}$ ,  $^4J_{\text{FF}} = 21.1$ , 9.1 Hz, 2F), -172.3 (td,  $^3J_{\text{FF}}$ ,  $^4J_{\text{FF}} = 21.3$ , 5.4 Hz, 2F), -173.2 (td,  $^3J_{\text{FF}}$ ,  $^4J_{\text{FF}} = 21.2$ , 5.8 Hz, 2F).

**$^{29}\text{Si}$  NMR** (119 MHz,  $\text{CD}_2\text{Cl}_2$ )  $\delta$  -109.8.

<sup>§</sup> Conversions determined through internal integration in  $^1\text{H}$  NMR spectra.



**Figure S2.** Stacked <sup>1</sup>H NMR spectra for the monitoring of the donor-induced reverse reaction of the CH bond cleavage.



**Figure S3.** Stacked <sup>19</sup>F NMR spectra for the monitoring of the donor-induced reverse reaction of the CH bond cleavage.

## 6 Reactivity and Catalysis

### Catalysis – General procedure.

A *J. Young* type NMR tube was charged with 10 mol% catalyst (10  $\mu\text{mol}$ ), heteroarene (1.0 – 5.0 eq.) and  $\text{CD}_2\text{Cl}_2$  (0.45 mL). Cyclooctane (100  $\mu\text{mol}$ , 1 eq.) was added as internal standard for the determination of yields by internal integration. Acrylonitrile (1.0 – 3.0 eq.) was added, the tube capped, kept at rt under constant motion and the mixture was continuously monitored using  $^1\text{H}$  NMR spectroscopy. When the reaction had proceeded, aq. sat.  $\text{Na}_2\text{CO}_3$  solution was added, the phases separated, and the aqueous phase extracted with DCM (x2). The combined organic phases were dried over  $\text{Na}_2\text{SO}_4$  and filtered over a short pad of silica, eluting with DCM. The solvent was removed under reduced pressure and the residue rigorously dried in *vacuo*.

### 3a (3-(N-methylpyrrole-3-yl)-propionitrile).

1.0 eq. N-methylindole, 3.0 eq. acrylonitrile. After 3 d at rt internal integration revealed >99% of product formation. Pale yellow viscous (87%).

$^1\text{H}$  NMR (200 MHz,  $\text{CD}_2\text{Cl}_2$ )  $\delta$  7.56 (d,  $J_{\text{HH}} = 7.7$  Hz, 1H), 7.34 (d,  $J = 8.1$  Hz, 1H), 7.24 (t,  $J_{\text{HH}} = 7.4$  Hz, 1H), 7.12 (t,  $J_{\text{HH}} = 7.3$  Hz, 1H), 7.02 (s, 1H), 3.76 (s, 3H), 3.12 (t,  $J_{\text{HH}} = 7.1$  Hz, 2H), 2.72 (t,  $J_{\text{HH}} = 7.1$  Hz, 2H).

$^1\text{H}$  NMR (600 MHz,  $\text{CDCl}_3$ )  $\delta$  7.56 (dd,  $J_{\text{HH}} = 7.9, 0.9$  Hz, 1H,  $\text{H}^{\text{a}}$ ), 7.34 (dd,  $J_{\text{HH}} = 8.2, 0.9$  Hz, 1H,  $\text{H}^{\text{b}}$ ), 7.28 (tt,  $J_{\text{HH}} = 9.0, 1.6$  Hz, 1H,  $\text{H}^{\text{c}}$ ), 7.16 (tt,  $J_{\text{HH}} = 6.9, 1.2$  Hz, 1H,  $\text{H}^{\text{d}}$ ), 7.01 (s, 1H,  $\text{H}^{\text{e}}$ ), 3.78 (s, 3H,  $\text{H}^{\text{f}}$ ), 3.13 (t,  $J_{\text{HH}} = 7.2$  Hz, 2H,  $\text{H}^{\text{g}}$ ), 2.70 (t,  $J_{\text{HH}} = 7.2$  Hz, 2H,  $\text{H}^{\text{h}}$ ).



NMR data is consistent with the one found in literature.<sup>11</sup>

$^{13}\text{C}$  NMR [ $^{13}\text{C}$ ,  $^1\text{H}$ - $^{13}\text{C}$ -HSQC,  $^1\text{H}$ - $^{13}\text{C}$ -HMBC] (151 MHz,  $\text{CDCl}_3$ )  $\delta$  137.1 ( $\text{C}^{\text{a}}$ ), 127.1 ( $\text{C}^{\text{b}}$ ), 127.0 ( $\text{C}^{\text{c}}$ ), 122.0 ( $\text{C}^{\text{d}}$ ), 119.9 ( $\text{C}^{\text{e}}$ ), 119.3 ( $\text{C}^{\text{f}}$ ), 118.3 ( $\text{C}^{\text{g}}$ ), 111.1 ( $\text{C}^{\text{h}}$ ), 109.6 ( $\text{C}^{\text{i}}$ ), 32.8 ( $\text{NCH}_3$ ,  $\text{C}^{\text{j}}$ ), 21.7 ( $\text{C}^{\text{k}}$ ), 19.0 ( $\text{C}^{\text{l}}$ ).

GCMS EI+ Retention time 14.5 min.  $m/z$  184.18 (26%)  $[\text{M}]^+$ , 144.14 (100%)  $[\text{M} - \text{CNCH}_2]^+$ .

### 3b (3-(N-methylpyrrole-3-yl)-propionitrile).

5.0 eq. N-methylpyrrole, 1.0 eq. acrylonitrile. After 14 h at rt internal integration revealed 86% of product formation. Pale yellow viscous (75%). Minor formation of  $3\text{b}'$  was observed (5% according to internal integration).

$^1\text{H}$  NMR (200 MHz,  $\text{CDCl}_3$ )  $\delta$  6.59 (t,  $J_{\text{HH}} = 2.3$  Hz, 1H), 6.08 (t,  $J_{\text{HH}} = 3.2$  Hz, 1H), 5.99 (m, 1H), 3.58 (s, 3H), 2.95 (t,  $J_{\text{HH}} = 7.5$  Hz, 3H), 2.65 (t,  $J_{\text{HH}} = 7.3$  Hz, 3H).

$^1\text{H}$  NMR (400 MHz,  $\text{CDCl}_3$ )  $\delta$  6.59 (d,  $J_{\text{HH}} = 4.4$  Hz, 1H,  $\text{H}^{\text{a}}$ ), 6.08 (d,  $J_{\text{HH}} = 6.3$  Hz, 1H,  $\text{H}^{\text{b}}$ ), 5.98 (ddd,  $J_{\text{HH}} = 2.6, 1.7, 0.9$  Hz, 1H,  $\text{H}^{\text{c}}$ ), 3.58 (s, 3H), 2.95 (td,  $J_{\text{HH}} = 7.6, 3.0$  Hz, 4H,  $\text{H}^{\text{d}}$ ), 2.65 (t,  $J_{\text{HH}} = 7.6$  Hz, 2H,  $\text{H}^{\text{e}}$ ).

$^{13}\text{C}$  NMR [ $^{13}\text{C}$ ,  $^1\text{H}$ - $^{13}\text{C}$ -HSQC,  $^1\text{H}$ - $^{13}\text{C}$ -HMBC] (101 MHz,  $\text{CDCl}_3$ )  $\delta$  129.0 ( $\text{C}^{\text{a}}$ ), 122.5 ( $\text{C}^{\text{b}}$ ), 119.3 ( $\text{C}^{\text{c}}$ ), 107.2 ( $\text{C}^{\text{d}}$ ), 106.6 ( $\text{C}^{\text{e}}$ ), 33.7 ( $\text{C}^{\text{f}}$ ), 22.7 ( $\text{C}^{\text{g}}$ ), 17.4 ( $\text{C}^{\text{h}}$ ).

GCMS EI+ Retention time 11.5 min.  $m/z$  134.30 (24%)  $[\text{M}]^+$ , 94.25 (100%)  $[\text{M} - \text{CNCH}_2]^+$ .



### 3b' (3,3'-(N-methylpyrrole-3,4-diyl)-dipropionitrile).

1.0 eq. N-methylpyrrole, 3.0 eq. acrylonitrile. After 3 d at rt internal integration revealed 92% of product formation. Pale orange solid (80%).

$^1\text{H}$  NMR (200 MHz,  $\text{CD}_2\text{Cl}_2$ )  $\delta$  5.92 (s, 2H,  $\text{H}^{\text{a}}$ ), 3.43 (s, 3H,  $\text{H}^{\text{b}}$ ), 2.92 (t,  $J_{\text{HH}} = 7.2$  Hz, 4H,  $\text{H}^{\text{c}}$ ), 2.65 (t,  $J_{\text{HH}} = 7.0$  Hz, 4H,  $\text{H}^{\text{d}}$ ).

$^1\text{H}$  NMR [ $^{13}\text{C}$ ,  $^1\text{H}$ - $^{13}\text{C}$ -HSQC,  $^1\text{H}$ - $^{13}\text{C}$ -HMBC] (600 MHz,  $\text{CDCl}_3$ )  $\delta$  5.93 (s, 2H,  $\text{H}^{\text{a}}$ ), 3.46 (s, 3H,  $\text{H}^{\text{b}}$ ), 2.93 (t,  $J_{\text{HH}} = 7.5$  Hz, 4H,  $\text{H}^{\text{c}}$ ), 2.64 (t,  $J_{\text{HH}} = 7.5$  Hz, 4H,  $\text{H}^{\text{d}}$ ).

$^{13}\text{C}$  NMR (151 MHz,  $\text{CDCl}_3$ )  $\delta$  129.5 ( $\text{C}^{\text{a}}$ ), 119.2 ( $\text{C}^{\text{b}}$ ), 105.7 ( $\text{C}^{\text{c}}$ ), 30.4 ( $\text{C}^{\text{d}}$ ), 23.0 ( $\text{C}^{\text{e}}$ ), 17.2 ( $\text{C}^{\text{f}}$ ).

GCMS EI+ Retention time 16.4 min.  $m/z$  187.18 (28%)  $[\text{M}]^+$ , 147.18 (90%)  $[\text{M} - \text{CNCH}_2]^+$ , 107.17 (100%)  $[\text{M} - \text{CNCH}_2 - \text{CN}]^+$ .



### Reaction of [pmpH][2a] with acrylonitrile.

Reacting a solution of equimolar amounts [pmpH][2a] in  $\text{CD}_2\text{Cl}_2$  at rt revealed formation of 38% **3a** after 16 h (determined by internal  $^1\text{H}$  integration and GCMS measurements). Longer reactions times up to 14 d only revealed a minorly increased proportion of **3a**.

### Comparison experiments with different silanes.

A *J. Young* type NMR tube was charged with N-methylpyrrole (21  $\mu\text{mol}$ ), equimolar amounts of silane (**1**,  $\text{Si}(\text{cat}^{\text{Cl}})_2$ ,<sup>12</sup>  $\text{SiCl}_4$ ) as well as pmp, and the compounds mixed in  $\text{CD}_2\text{Cl}_2$ . The reaction mixtures were monitored using NMR spectroscopy. Conversions mentioned in the main manuscript were obtained through integration of  $^1\text{H}$  NMR spectra after addition of hexamethylbenzene as internal standard.



## 7 Computational Details

All geometry optimizations and single point energies were calculated using the Orca 5.0 program package.<sup>13, 14</sup> As starting geometries, VSEPR structures preoptimized with UFF were used. Geometry optimizations for all compounds were performed with the PBE0 functional,<sup>15, 16</sup> utilizing Grimme's semi-empirical dispersion correction<sup>17</sup> (D3), the Becke-Johnson damping function<sup>18-20</sup> (BJ), and the def2-TZVPP basis set,<sup>21, 22</sup> using *defgrid2* settings. All calculated equilibrium structures have been confirmed as energetic minima on the potential energy surface by analytical calculation of harmonic frequencies at the level of optimization, revealing only positive Hessian eigenvalues. Transition geometries were optimized toward a single negative Hessian matrix eigenvalue. It was ensured that the correct first-order saddle point on the potential energy surface was located by animation of the imaginary frequency in Chemcraft.<sup>23</sup> Enthalpies at 298.15 K have been calculated by using the rigid-rotor harmonic oscillator (RRHO) approximation,<sup>24</sup> as implemented in Orca. In all computations, the resolution-of-identity<sup>25</sup> and "chain of spheres"<sup>26</sup> approximation in the form of RIJCOSX was used in combination with matching auxiliary basis sets.<sup>27</sup> Final single point energies for the structures were obtained at the DLPNO-CCSD(T)/def2-TZVPP level of theory.<sup>21, 22, 28-31</sup> Implicit solvation effects were considered at this level using the *Universal Solvent Model* (SMD),<sup>32</sup> as implemented in the Orca program package.<sup>33</sup> This combination is denoted as DLPNO-CCSD(T)/def2-TZVPP+SMD(CH<sub>2</sub>Cl<sub>2</sub>)/PBE0-D3(BJ)/def2-TZVPP in the main text. Resulting energies as well as thermodynamic and kinetic data are summarized in **Table S3**.

**Table S3.** Computed energies for the calculation of thermodynamics and kinetics. Note that concentration contribution from gas phase (1 atm.) to solution phase (1 mol L<sup>-1</sup>) for the solvation was considered ( $\Delta E^0_{\text{conc}} = RT \cdot \ln(24.5) = 7.9 \text{ kJ mol}^{-1}$ , for T = 298K).

| Compound                                                                                                                    | PBE0-D3(BJ)/def2-TZVPP   |                          | DLPNO-CCSD(T)/<br>def2-TZVPP SMD(CH <sub>2</sub> Cl <sub>2</sub> ) |               | G =<br>(E <sup>DLPNO</sup> - E <sup>PBE0</sup> + G <sup>PBE0</sup> ) + $\Delta E^0_{\text{conc}}$ |
|-----------------------------------------------------------------------------------------------------------------------------|--------------------------|--------------------------|--------------------------------------------------------------------|---------------|---------------------------------------------------------------------------------------------------|
|                                                                                                                             | E <sup>PBE0</sup> [a.u.] | G <sup>PBE0</sup> [a.u.] | HP <sup>PBE0</sup> [a.u.]                                          | EDLPNO [a.u.] |                                                                                                   |
| <b>1</b>                                                                                                                    | -3259.3246               | -3259.1694               | -3259.0636                                                         | -3256.7757    | -8550250.0                                                                                        |
| pmp                                                                                                                         | -448.0953                | -447.8317                | -447.7829                                                          | -447.6534     | -1174614.1                                                                                        |
| [pmpH] <sup>+</sup>                                                                                                         | -448.5023                | -448.2241                | -448.1747                                                          | -448.1345     | -1175839.2                                                                                        |
| [1...pmp] <sup>VDW</sup>                                                                                                    | -3707.4480               | -3707.0044               | -3706.8727                                                         | -3704.4546    | -9724873.6                                                                                        |
| N-methylindole                                                                                                              | -402.8151                | -402.6894                | -402.6480                                                          | -402.4032     | -1056171.5                                                                                        |
| <b>[2a]<sup>-</sup></b> / [1-C <sub>9</sub> H <sub>5</sub> NCH <sub>3</sub> C <sup>3-pos.</sup> ] <sup>-</sup>              | -3661.6797               | -3661.3855               | -3661.2624                                                         | -3658.7465    | -9605259.5                                                                                        |
| 1...C <sub>9</sub> H <sub>5</sub> NCH <sub>3</sub> C <sup>3-pos.</sup> ( <b>INT-2a</b> )                                    | -3662.1568               | -3661.8479               | -3661.7263                                                         | -3659.1977    | -9606405.5                                                                                        |
| [TS-a-FLP <sup>C2-pos.</sup> ] <sup>‡</sup>                                                                                 | -4110.2442               | -4109.6491               | -4109.5033                                                         | -4106.8349    | -10780925.6                                                                                       |
| [TS-a-FLP <sup>C3-pos.</sup> ] <sup>‡</sup>                                                                                 | -4110.2632               | -4109.6663               | -4109.5219                                                         | -4106.8595    | -10780985.6                                                                                       |
| <b>Thermodynamics</b>                                                                                                       |                          |                          |                                                                    |               | $\Delta G$                                                                                        |
| [1...pmp] <sup>VDW</sup> + N-methylindole --> [2a] <sup>-</sup> + [pmpH] <sup>+</sup>                                       |                          |                          |                                                                    |               | -53.6                                                                                             |
| [1...pmp] <sup>VDW</sup> + N-methylindole --> 1...C <sub>9</sub> H <sub>5</sub> NCH <sub>3</sub> C <sup>3-pos.</sup> + pmp  |                          |                          |                                                                    |               | 25.5                                                                                              |
| <b>Kinetics</b>                                                                                                             |                          |                          |                                                                    |               | $\Delta G$                                                                                        |
| [1...pmp] <sup>VDW</sup> + N-methylindole --> [TS-a-FLP <sup>C2-pos.</sup> ] <sup>‡</sup>                                   |                          |                          |                                                                    |               | 119.5                                                                                             |
| [1...pmp] <sup>VDW</sup> + N-methylindole --> [TS-a-FLP <sup>C3-pos.</sup> ] <sup>‡</sup>                                   |                          |                          |                                                                    |               | 59.5                                                                                              |
| N-methylpyrrole                                                                                                             | -249.2839                | -249.2019                | -249.1666                                                          | -249.0409     | -653633.8                                                                                         |
| <b>[2b]<sup>-</sup></b> / [1-C <sub>4</sub> H <sub>3</sub> NCH <sub>3</sub> C <sup>3-pos.</sup> ] <sup>-</sup>              | -3508.1445               | -3507.8959               | -3507.7772                                                         | -3505.3821    | -9202721.0                                                                                        |
| 1...C <sub>4</sub> H <sub>3</sub> NCH <sub>3</sub> C <sup>3-pos.</sup> ( <b>INT-2b</b> )                                    | -3508.6232               | -3508.3608               | -3508.2425                                                         | -3505.8287    | -9203856.9                                                                                        |
| [TS-b-FLP <sup>C2-pos.</sup> ] <sup>‡</sup>                                                                                 | -3956.7192               | -3956.1688               | -3956.0278                                                         | -3953.4817    | -10378413.8                                                                                       |
| [TS-b-FLP <sup>C3-pos.</sup> ] <sup>‡</sup>                                                                                 | -3956.7252               | -3956.1755               | -3956.0343                                                         | -3953.4891    | -10378435.3                                                                                       |
| [TS-b-ELC-O <sup>C2-pos.</sup> ] <sup>‡</sup>                                                                               | -3508.5774               | -3508.3192               | -3508.2022                                                         | -3505.7758    | -9203729.1                                                                                        |
| [TS-b-ELC-O <sup>C3-pos.</sup> ] <sup>‡</sup>                                                                               | -3508.5765               | -3508.3190               | -3508.2016                                                         | -3505.7769    | -9203733.8                                                                                        |
| [TS-b-ELC-N <sup>C2-pos.</sup> ] <sup>‡</sup>                                                                               | -3508.5760               | -3508.3188               | -3508.2008                                                         | -3505.7739    | -9203727.0                                                                                        |
| [TS-b-ELC-N <sup>C3-pos.</sup> ] <sup>‡</sup>                                                                               | -3508.5749               | -3508.3183               | -3508.2000                                                         | -3505.7750    | -9203731.4                                                                                        |
| <b>Thermodynamics</b>                                                                                                       |                          |                          |                                                                    |               | $\Delta G$                                                                                        |
| [1...pmp] <sup>VDW</sup> + N-methylpyrrole --> [2b] <sup>-</sup> + [pmpH] <sup>+</sup>                                      |                          |                          |                                                                    |               | -52.8                                                                                             |
| [1...pmp] <sup>VDW</sup> + N-methylpyrrole --> 1...C <sub>4</sub> H <sub>3</sub> NCH <sub>3</sub> C <sup>3-pos.</sup> + pmp |                          |                          |                                                                    |               | 36.4                                                                                              |
| <b>Kinetics (FLP)</b>                                                                                                       |                          |                          |                                                                    |               | $\Delta G$                                                                                        |
| [1...pmp] <sup>VDW</sup> + N-methylpyrrole --> [TS-b-FLP <sup>C2-pos.</sup> ] <sup>‡</sup>                                  |                          |                          |                                                                    |               | 93.6                                                                                              |
| [1...pmp] <sup>VDW</sup> + N-methylpyrrole --> [TS-b-FLP <sup>C3-pos.</sup> ] <sup>‡</sup>                                  |                          |                          |                                                                    |               | 72.1                                                                                              |
| <b>Kinetics (ELC)</b>                                                                                                       |                          |                          |                                                                    |               | $\Delta G$                                                                                        |
| [1...pmp] <sup>VDW</sup> + N-methylpyrrole --> [TS-b-ELC-O <sup>C2-pos.</sup> ] <sup>‡</sup> + pmp                          |                          |                          |                                                                    |               | 164.2                                                                                             |
| [1...pmp] <sup>VDW</sup> + N-methylpyrrole --> [TS-b-ELC-O <sup>C3-pos.</sup> ] <sup>‡</sup> + pmp                          |                          |                          |                                                                    |               | 159.6                                                                                             |
| [1...pmp] <sup>VDW</sup> + N-methylpyrrole --> [TS-b-ELC-N <sup>C2-pos.</sup> ] <sup>‡</sup> + pmp                          |                          |                          |                                                                    |               | 166.3                                                                                             |
| [1...pmp] <sup>VDW</sup> + N-methylpyrrole --> [TS-b-ELC-N <sup>C3-pos.</sup> ] <sup>‡</sup> + pmp                          |                          |                          |                                                                    |               | 162.0                                                                                             |
| thiophene                                                                                                                   | -552.7634                | -552.7235                | -552.6913                                                          | -552.2663     | -1449862.5                                                                                        |
| <b>[2e]<sup>-</sup></b> / [1-C <sub>4</sub> H <sub>3</sub> S <sup>C2-pos.</sup> ] <sup>-</sup>                              | -3811.6307               | -3811.4236               | -3811.3084                                                         | -3808.6127    | -9998961.6                                                                                        |
| [1-C <sub>4</sub> H <sub>3</sub> S <sup>C3-pos.</sup> ] <sup>-</sup>                                                        | -3811.6267               | -3811.4202               | -3811.3044                                                         | -3808.6076    | -9998950.3                                                                                        |
| [TS-e-FLP <sup>C2-pos.</sup> ] <sup>‡</sup>                                                                                 | -4260.1957               | -4259.6898               | -4259.5504                                                         | -4256.7027    | -11174637.7                                                                                       |
| [TS-e-FLP <sup>C3-pos.</sup> ] <sup>‡</sup>                                                                                 | -4260.1879               | -4259.6807               | -4259.5425                                                         | -4256.6951    | -11174614.2                                                                                       |

# SUPPORTING INFORMATION

|                                                                                                                                                                                                              |            |            |            |            |             |
|--------------------------------------------------------------------------------------------------------------------------------------------------------------------------------------------------------------|------------|------------|------------|------------|-------------|
| <b>Thermodynamics</b>                                                                                                                                                                                        |            |            |            |            | $\Delta G$  |
| [1 $\cdots$ pmp] <sup>VDW</sup> + thiophene --> [2e] <sup>-</sup> + [pmpH] <sup>+</sup>                                                                                                                      |            |            |            |            | -64.7       |
| [1 $\cdots$ pmp] <sup>VDW</sup> + thiophene --> [1—C <sub>4</sub> H <sub>3</sub> S <sup>C3-pos.</sup> ] <sup>-</sup> + [pmpH] <sup>+</sup>                                                                   |            |            |            |            | -53.4       |
| <b>Kinetics (FLP)</b>                                                                                                                                                                                        |            |            |            |            | $\Delta G$  |
| [1 $\cdots$ pmp] <sup>VDW</sup> + thiophene --> [TS-e-FLP <sup>C2-pos.</sup> ] <sup>‡</sup>                                                                                                                  |            |            |            |            | 98.4        |
| [1 $\cdots$ pmp] <sup>VDW</sup> + thiophene --> [TS-e-FLP <sup>C3-pos.</sup> ] <sup>‡</sup>                                                                                                                  |            |            |            |            | 121.9       |
| phenylacetylene (PhCCH)                                                                                                                                                                                      | -308.1402  | -308.0605  | -308.0228  | -307.8239  | -807974.5   |
| [2d] <sup>-</sup> / [1-CCPh] <sup>-</sup>                                                                                                                                                                    | -3567.0122 | -3566.7658 | -3566.6437 | -3564.1757 | -9357089.0  |
| 1—PhCCH                                                                                                                                                                                                      | -3567.4713 | -3567.2112 | -3567.0912 | -3564.5982 | -9358162.4  |
| <b>Thermodynamics</b>                                                                                                                                                                                        |            |            |            |            | $\Delta G$  |
| [1 $\cdots$ pmp] <sup>VDW</sup> + PhCCH --> [2d] <sup>-</sup> + [pmpH] <sup>+</sup>                                                                                                                          |            |            |            |            | -80.1       |
| [1 $\cdots$ pmp] <sup>VDW</sup> + PhCCH --> [1—PhCCH] <sup>-</sup> + [pmpH] <sup>+</sup>                                                                                                                     |            |            |            |            | 71.7        |
| SiCl <sub>4</sub>                                                                                                                                                                                            | -2129.8583 | -2129.8835 | -2129.8435 | -2128.1797 | -5587594.6  |
| pmp-SiCl <sub>4</sub>                                                                                                                                                                                        | -2577.9019 | -2577.6350 | -2577.5706 | -2575.7864 | -6762019.1  |
| [TS-N-methylpyrrole--pmp-SiCl <sub>4</sub> ] <sup>‡</sup>                                                                                                                                                    | -2827.2050 | -2826.8399 | -2826.7603 | -2824.8439 | -7415661.8  |
| <b>Thermodynamics</b>                                                                                                                                                                                        |            |            |            |            |             |
| SiCl <sub>4</sub> + pmp --> pmp-SiCl <sub>4</sub>                                                                                                                                                            |            |            |            |            | 189.6       |
| <b>Kinetics</b>                                                                                                                                                                                              |            |            |            |            |             |
| SiCl <sub>4</sub> + pmp + N-methylpyrrole --> [TS-N-methylpyrrole--pmp-SiCl <sub>4</sub> ] <sup>‡</sup>                                                                                                      |            |            |            |            | 180.7       |
| Si(cat <sup>C1</sup> ) <sub>2</sub>                                                                                                                                                                          | -4727.7242 | -4727.6717 | -4727.5971 | -4723.9832 | -12402672.9 |
| pmp-Si(cat <sup>C1</sup> ) <sub>2</sub>                                                                                                                                                                      | -5175.8413 | -5175.4947 | -5175.3970 | -5171.6652 | -13577290.3 |
| [TS-N-methylpyrrole--pmp-Si(cat <sup>C1</sup> ) <sub>2</sub> ] <sup>‡</sup>                                                                                                                                  | -5425.1240 | -5424.6786 | -5424.5665 | -5420.6961 | -14230861.4 |
| [Si(cat <sup>C1</sup> ) <sub>2</sub> ...pmp] <sup>VDW</sup> (van-der-Waals adduct)                                                                                                                           | -5175.8359 | -5175.4953 | -5175.3940 | -5171.6494 | -13577264.5 |
| Si(cat <sup>C1</sup> ) <sub>2</sub> ...C <sub>4</sub> H <sub>4</sub> NCH <sub>3</sub>                                                                                                                        | -4977.0220 | -4976.8625 | -4976.7750 | -4973.0387 | -13056287.3 |
| [Si(cat <sup>C1</sup> ) <sub>2</sub> —C <sub>4</sub> H <sub>4</sub> NCH <sub>3</sub> <sup>C3-pos.</sup> ] <sup>-</sup>                                                                                       | -4976.5412 | -4976.3951 | -4976.3069 | -4972.5914 | -13055148.4 |
| [Si(cat <sup>C1</sup> ) <sub>2</sub> —C <sub>4</sub> H <sub>4</sub> NCH <sub>3</sub> <sup>C2-pos.</sup> ] <sup>-</sup>                                                                                       | -4976.5429 | -4976.3966 | -4976.3086 | -4972.5895 | -13055142.6 |
| <b>Thermodynamics<sup>§</sup></b>                                                                                                                                                                            |            |            |            |            | $\Delta G$  |
| Si(cat <sup>C1</sup> ) <sub>2</sub> + pmp --> pmp-Si(cat <sup>C1</sup> ) <sub>2</sub>                                                                                                                        |            |            |            |            | -3.3        |
| Si(cat <sup>C1</sup> ) <sub>2</sub> + pmp --> [Si(cat <sup>C1</sup> ) <sub>2</sub> ...pmp] <sup>VDW</sup>                                                                                                    |            |            |            |            | 22.5        |
| Si(cat <sup>C1</sup> ) <sub>2</sub> + N-methylpyrrole --> Si(cat <sup>C1</sup> ) <sub>2</sub> ...C <sub>4</sub> H <sub>4</sub> NCH <sub>3</sub>                                                              |            |            |            |            | 19.5        |
| Si(cat <sup>C1</sup> ) <sub>2</sub> + N-methylpyrrole + pmp --> [pmpH] <sup>+</sup> + [Si(cat <sup>C1</sup> ) <sub>2</sub> —C <sub>4</sub> H <sub>4</sub> NCH <sub>3</sub> <sup>C2-pos.</sup> ] <sup>-</sup> |            |            |            |            | -61.0       |
| Si(cat <sup>C1</sup> ) <sub>2</sub> + N-methylpyrrole + pmp --> [pmpH] <sup>+</sup> + [Si(cat <sup>C1</sup> ) <sub>2</sub> —C <sub>4</sub> H <sub>4</sub> NCH <sub>3</sub> <sup>C3-pos.</sup> ] <sup>-</sup> |            |            |            |            | -66.8       |
| <b>Kinetics<sup>§</sup></b>                                                                                                                                                                                  |            |            |            |            | $\Delta G$  |
| Si(cat <sup>C1</sup> ) <sub>2</sub> + N-methylpyrrole + pmp --> [TS-N-methylpyrrole--pmp-Si(cat <sup>C1</sup> ) <sub>2</sub> ] <sup>‡</sup>                                                                  |            |            |            |            | 62.7        |

<sup>§</sup> Energies derived are calculated using the monomeric Si(cat<sup>C1</sup>)<sub>2</sub> structure due to computational ease. It shall be noted that the donor-free form is not monomeric and undergoes oligomerization.<sup>12</sup> It is reported that the oligomerization is easily reversed in presence of donors and the *in silico* consideration of a monomer leads to reasonable results,<sup>34</sup> yet deviations to the calculations using a monomeric form are to be expected.

## 8 Single Crystal X-Ray Diffraction (scXRD)

### General

For scXRD measurements, a suitable crystal was picked from the mother liquor, immersed in perfluorinated polyether oil, and fixed on top of a cryo loop. A Bruker APEX-III CCD diffractometer with a low-temperature unit using Mo-K $\alpha$  radiation, chromated by mirror optics, was used for phi- and omega- scans. Data acquisition was done at 100.0 K. A strategy for data collection was calculated with Bruker's APEX3 software. The same program was used for processing of collected data. Data reduction, scaling, and absorption corrections were done with SAINT. SA-DABS-2016/2 was used for multi-scan absorption correction. Structures were solved with dual methods as implemented in the ShelXT 2018 structure solution program. Structure refinement was carried out by full matrix least squares minimization on F<sup>2</sup> using the 2018/3 version of ShelXL. All non-hydrogen atoms were refined anisotropically. Hydrogen atom positions were calculated geometrically and refined using a riding model. Handling of the structural data during solution and refinement was performed with the Olex2 v1.3 graphical interface.<sup>35</sup> For data visualization, Mercury 4.1.3 was used.<sup>36-38</sup> The thermal displacement ellipsoids are shown at the probability level of 50%.

CCDC 2279861 contains the supplementary crystallographic data for this paper. These data can be obtained free of charge from the Cambridge Crystallographic Data Centre's and FIZ Karlsruhe's joint Access Service via <https://www.ccdc.cam.ac.uk/structures/>.



Figure S4. Solid state molecular structure of [pmpH][2a]. Ellipsoids are drawn with a probability of 50%.

Table S4. Crystal data for [pmpH][2a].

|                                                 |                                                                                  |
|-------------------------------------------------|----------------------------------------------------------------------------------|
| CCDC number                                     | 2279861                                                                          |
| Empirical formula                               | C <sub>43</sub> H <sub>30</sub> F <sub>18</sub> N <sub>4</sub> O <sub>2</sub> Si |
| Formula weight                                  | 1004.80                                                                          |
| Temperature [K]                                 | 100.00                                                                           |
| Crystal system                                  | monoclinic                                                                       |
| Space group (number)                            | <i>P</i> 2 <sub>1</sub> / <i>c</i> (14)                                          |
| <i>a</i> [Å]                                    | 19.1013(6)                                                                       |
| <i>b</i> [Å]                                    | 11.5155(3)                                                                       |
| <i>c</i> [Å]                                    | 19.3079(6)                                                                       |
| $\alpha$ [°]                                    | 90                                                                               |
| $\beta$ [°]                                     | 105.8930(10)                                                                     |
| $\gamma$ [°]                                    | 90                                                                               |
| Volume [Å <sup>3</sup> ]                        | 4084.6(2)                                                                        |
| <i>Z</i>                                        | 4                                                                                |
| $\rho_{\text{calc}}$ [gcm <sup>-3</sup> ]       | 1.634                                                                            |
| $\mu$ [mm <sup>-1</sup> ]                       | 0.185                                                                            |
| <i>F</i> (000)                                  | 2032                                                                             |
| Crystal size [mm <sup>3</sup> ]                 | 0.412x0.383x0.295                                                                |
| Crystal color                                   | colorless                                                                        |
| Crystal shape                                   | block                                                                            |
| Radiation                                       | MoK $\alpha$ ( $\lambda$ =0.71073 Å)                                             |
| 2 $\theta$ range [°]                            | 4.17 to 56.71 (0.75 Å)                                                           |
| Index ranges                                    | -25 ≤ <i>h</i> ≤ 25<br>-15 ≤ <i>k</i> ≤ 15<br>-25 ≤ <i>l</i> ≤ 25                |
| Reflections collected                           | 106718                                                                           |
| Independent reflections                         | 10124<br><i>R</i> <sub>int</sub> = 0.0412<br><i>R</i> <sub>sigma</sub> = 0.0198  |
| Completeness to<br>$\theta = 25.242^\circ$      | 99.1 %                                                                           |
| Data / Restraints / Parameters                  | 10124/0/619                                                                      |
| Goodness-of-fit on <i>F</i> <sup>2</sup>        | 1.027                                                                            |
| Final <i>R</i> indexes<br>[ $\geq 2\sigma(I)$ ] | <i>R</i> <sub>1</sub> = 0.0425<br><i>wR</i> <sub>2</sub> = 0.1074                |
| Final <i>R</i> indexes<br>[all data]            | <i>R</i> <sub>1</sub> = 0.0456<br><i>wR</i> <sub>2</sub> = 0.1099                |
| Largest peak/hole [eÅ <sup>-3</sup> ]           | 0.86/-0.62                                                                       |



Figure S5. Unrefined solid state molecular structure of 1-DMI. Ellipsoids are drawn with a probability of 50%.

## 9 References

- 1 A. M. Kelly-Rowley, V. M. Lynch and E. V. Anslyn, *J. Am. Chem. Soc.*, 1995, **117**, 3438-3447.
- 2 S. Tshepelevitsh, A. Kütt, M. Lökov, I. Kaljurand, J. Saame, A. Heering, P. G. Plieger, R. Vianello and I. Leito, *Eur. J. Org. Chem.*, 2019, **2019**, 6735-6748.
- 3 H. K. Hall Jr., *J. Am. Chem. Soc.*, 1957, **79**, 5441-5444.
- 4 E.-I. Rööm, A. Kütt, I. Kaljurand, I. Koppel, I. Leito, I. A. Koppel, M. Mishima, K. Goto and Y. Miyahara, *Chem. Eur. J.*, 2007, **13**, 7631-7643.
- 5 R. R. Fraser, T. S. Mansour and S. Savard, *Can. J. Chem.*, 1985, **63**, 3505-3509.
- 6 A. Streitwieser, Jr. and D. M. E. Reuben, *J. Am. Chem. Soc.*, 1971, **93**, 1794-1795.
- 7 F. G. Bordwell, *Acc. Chem. Res.*, 1988, **21**, 456-463.
- 8 T. Thorwart, D. Hartmann and L. Greb, *Chem. Eur. J.*, 2022, **28**, e202202273.
- 9 G. F. Riegel and S. R. Kass, *J. Org. Chem.*, 2020, **85**, 6017-6026.
- 10 E. M. Simmons and J. F. Hartwig, *Angew. Chem. Int. Ed.*, 2012, **51**, 3066-3072.
- 11 M. W. Majchrzak and G. Simchen, *Synthesis*, 1986, **1986**, 956-958.
- 12 N. Ansmann, D. Hartmann, S. Sailer, P. Erdmann, R. Maskey, M. Schorpp and L. Greb, *Angew. Chem. Int. Ed.*, 2022, **61**, e202203947.
- 13 F. Neese, *Wiley Interdiscip. Rev. Comput. Mol. Sci.*, 2012, **2**, 73-78.
- 14 F. Neese, *Wiley Interdiscip. Rev. Comput. Mol. Sci.*, 2018, **8**, e1327.
- 15 J. P. Perdew, K. Burke and M. Ernzerhof, *Phys. Rev. Lett.*, 1996, **77**, 3865-3868.
- 16 C. Adamo and V. Barone, *J. Chem. Phys.*, 1999, **110**, 6158-6170.
- 17 S. Grimme, J. Antony, S. Ehrlich and H. Krieg, *The Journal of Chemical Physics*, 2010, **132**, 1-19.
- 18 S. Grimme, S. Ehrlich and L. Goerigk, *J. Comput. Chem.*, 2011, **32**, 1456-1465.
- 19 E. R. Johnson and A. D. Becke, *J. Chem. Phys.*, 2005, **123**.
- 20 A. D. Becke and E. R. Johnson, *The Journal of Chemical Physics*, 2005, **122**, 1-5.
- 21 A. Schäfer, C. Huber and R. Ahlrichs, *J. Chem. Phys.*, 1994, **100**, 5829-5835.
- 22 F. Weigend and R. Ahlrichs, *Phys. Chem. Chem. Phys.*, 2005, **7**, 3297-3305.
- 23 G. A. Andrienko, <https://www.chemcraftprog.com>, ChemCraft 1.8.
- 24 S. Grimme, *Chem-Eur. J.*, 2012, **18**, 9955-9964.
- 25 K. Eichkorn, O. Treutler, H. Ohm, M. Haser and R. Ahlrichs, *Chem. Phys. Lett.*, 1995, **242**, 652-660.
- 26 F. Neese, F. Wennmohs, A. Hansen and U. Becker, *Chem. Phys.*, 2009, **356**, 98-109.
- 27 K. Eichkorn, F. Weigend, O. Treutler and R. Ahlrichs, *Theor. Chem. Acc.*, 1997, **97**, 119-124.
- 28 F. Neese, A. Hansen and D. G. Liakos, *J. Chem. Phys.*, 2009, **131**, 064103.
- 29 C. Riplinger and F. Neese, *J. Chem. Phys.*, 2013, **138**, 034106.
- 30 C. Riplinger, B. Sandhoefer, A. Hansen and F. Neese, *J. Chem. Phys.*, 2013, **139**, 134101.
- 31 A. Schafer, C. Huber and R. Ahlrichs, *J. Chem. Phys.*, 1994, **100**, 5829-5835.
- 32 A. V. Marenich, C. J. Cramer and D. G. Truhlar, *The Journal of Physical Chemistry B*, 2009, **113**, 6378-6396.
- 33 M. Garcia-Rates, U. Becker and F. Neese, *J. Comput. Chem.*, 2021, **42**, 1959-1973.
- 34 N. Ansmann, T. Thorwart and L. Greb, *Angew. Chem. Int. Ed.*, 2022, **61**, e202210132.
- 35 O. V. Dolomanov, L. J. Bourhis, R. J. Gildea, J. A. K. Howard and H. Puschmann, *J. Appl. Crystallogr.*, 2009, **42**, 339-341.
- 36 I. J. Bruno, J. C. Cole, P. R. Edgington, M. Kessler, C. F. Macrae, P. McCabe, J. Pearson and R. Taylor, *Acta Crystallogr. B*, 2002, **58**, 389-397.
- 37 C. F. Macrae, P. R. Edgington, P. McCabe, E. Pidcock, G. P. Shields, R. Taylor, M. Towler and J. van de Streek, *J. Appl. Crystallogr.*, 2006, **39**, 453-457.
- 38 C. F. Macrae, I. Sovago, S. J. Cottrell, P. T. A. Galek, P. McCabe, E. Pidcock, M. Platings, G. P. Shields, J. S. Stevens, M. Towler and P. A. Wood, *J. Appl. Crystallogr.*, 2020, **53**, 226-235.

## 10 Spectra



Figure S6. <sup>1</sup>H NMR (200 MHz, CD<sub>2</sub>Cl<sub>2</sub>) spectrum of [pmpH][2a]. Residual silicon-grease resonance is marked with an asterisk.



Figure S7. <sup>13</sup>C NMR (101 MHz, CD<sub>2</sub>Cl<sub>2</sub>) spectrum of [pmpH][2a].

# SUPPORTING INFORMATION



**Figure S8.** <sup>19</sup>F NMR (376 MHz, CD<sub>2</sub>Cl<sub>2</sub>) spectrum of [pmpH][2a].



**Figure S9.** <sup>29</sup>Si NMR (119 MHz, CD<sub>2</sub>Cl<sub>2</sub>) spectrum of [pmpH][2a].

# SUPPORTING INFORMATION



**Figure S10.** <sup>1</sup>H NMR (400 MHz, CD<sub>2</sub>Cl<sub>2</sub>) spectrum of [pmpH][2b]. Residual H-grease and C<sub>6</sub>H<sub>6</sub> resonances are marked with an asterisk.



**Figure S11.** <sup>13</sup>C NMR (101 MHz, CD<sub>2</sub>Cl<sub>2</sub>) spectrum of [pmpH][2b]. Residual H-grease resonances are marked with an asterisk.



Figure S12. <sup>19</sup>F NMR (376 MHz, CD<sub>2</sub>Cl<sub>2</sub>) spectrum of [pmpH][2b].



Figure S13. <sup>29</sup>Si NMR (119 MHz, CD<sub>2</sub>Cl<sub>2</sub>) spectrum of [pmpH][2b].



# SUPPORTING INFORMATION



**Figure S14.** <sup>1</sup>H NMR (200 MHz, CD<sub>2</sub>Cl<sub>2</sub>) spectrum of [pmpH][2c]. Residual silicon-grease resonance is marked with an asterisk.



**Figure S15.** <sup>13</sup>C NMR (101 MHz, CD<sub>2</sub>Cl<sub>2</sub>) spectrum of [pmpH][2c].



Figure S16. <sup>19</sup>F NMR (376 MHz, CD<sub>2</sub>Cl<sub>2</sub>) spectrum of [pmpH][2c].



Figure S17. <sup>29</sup>Si NMR (119 MHz, CD<sub>2</sub>Cl<sub>2</sub>) spectrum of [pmpH][2c].

# SUPPORTING INFORMATION



**Figure S18.** <sup>1</sup>H NMR (400 MHz, CD<sub>2</sub>Cl<sub>2</sub>) spectrum of [pmpH][2d]. Residual silicon-grease resonance is marked with an asterisk.



**Figure S19.** <sup>13</sup>C NMR (101 MHz, CD<sub>2</sub>Cl<sub>2</sub>) and <sup>1</sup>H-<sup>13</sup>C-HMBC spectra of [pmpH][2d].



Figure S20.  $^{19}\text{F}$  NMR (376 MHz,  $\text{CD}_2\text{Cl}_2$ ) spectrum of [pmpH][2d].



Figure S21.  $^{29}\text{Si}$  NMR (119 MHz,  $\text{CD}_2\text{Cl}_2$ ) spectrum of [pmpH][2d].

# SUPPORTING INFORMATION



**Figure S22.**  $^1\text{H}$  NMR (200 MHz,  $\text{CD}_2\text{Cl}_2$ ) spectrum of [pmpH][2e]. Residual silicon-grease resonance is marked with an asterisk.



**Figure S23.**  $^{13}\text{C}$  NMR (151 MHz,  $\text{CD}_2\text{Cl}_2$ ) spectrum of [pmpH][2e]. Residual thiophene resonances are marked with an asterisk.

# SUPPORTING INFORMATION



**Figure S24.** <sup>13</sup>C NMR (101 MHz, CD<sub>2</sub>Cl<sub>2</sub>) spectrum of [pmpH][2e].



**Figure S25.** <sup>1</sup>H-<sup>13</sup>C-HSQC (600/151 MHz, CD<sub>2</sub>Cl<sub>2</sub>) spectrum of [pmpH][2e].



Figure S26.  $^1\text{H}$ - $^{13}\text{C}$ -HMBC (600/151 MHz,  $\text{CD}_2\text{Cl}_2$ ) spectrum of [pmpH][2e].



Figure S27.  $^{19}\text{F}$  NMR (376 MHz,  $\text{CD}_2\text{Cl}_2$ ) spectrum of [pmpH][2e].



Figure S28.  $^{29}\text{Si}$  NMR (119 MHz,  $\text{CD}_2\text{Cl}_2$ ) spectrum of [pmpH][2e].



Figure S29.  $^1\text{H}$ - $^{29}\text{Si}$ -HMBC (600/119 MHz,  $\text{CD}_2\text{Cl}_2$ ) spectrum of [pmpH][2e].



## 11 Cartesian Coordinates of Computed Structures (XYZ Format)

For coordinates of 1, pmp, [pmpH]<sup>+</sup>, and [1<sup>---</sup>pmp]<sup>3+</sup> see previous work with calculations on the same level of theory.<sup>8</sup>

### N-methylindole

|   |                   |                    |                   |
|---|-------------------|--------------------|-------------------|
| C | -5.18395143130943 | 0.39541490645733   | -0.24280155909141 |
| C | -3.92849446019029 | 0.83895516035491   | 0.05331439892577  |
| C | -4.06518637912635 | 2.18507615364646   | 0.50940524771795  |
| H | -3.01748610532484 | 0.27118467447318   | -0.04258724560119 |
| N | -6.10571562718461 | 1.38313021625341   | -0.00153583312398 |
| H | -5.50911450937269 | -0.564093341495320 | -0.61384061602925 |
| C | -5.4463798485158  | 2.49128420298209   | 0.46106240276067  |
| C | -3.17417178902152 | 3.16461734802059   | 0.95459303994708  |
| C | -5.94667834133584 | 3.73258365503840   | 0.84130305019152  |
| C | -7.52360508526574 | 1.28531958908027   | -0.19638075045932 |
| H | -8.06075061519562 | 1.43388847149961   | 0.74382808615494  |
| H | -7.76351554972008 | 0.29476139229552   | -0.57800179807003 |
| H | -7.87273723625009 | 2.02843820986883   | -0.91753393322119 |
| C | -5.03888367269656 | 4.67857851255161   | 1.27691266840179  |
| C | -3.66694067502163 | 4.39719866931246   | 1.33290356458779  |
| H | -2.11136633560992 | 2.95874764800137   | 1.00232993946763  |
| H | -2.98479754761022 | 5.16369764445364   | 1.67969721770491  |
| H | -7.00625691650512 | 3.95380260012780   | 0.80008212454939  |
| H | -5.39373973840783 | 5.65576436053569   | 1.58052999529239  |

### [2a]<sup>+</sup>

|    |                   |                   |                   |
|----|-------------------|-------------------|-------------------|
| C  | -5.09076857506450 | 2.45362674731919  | -0.39131196506676 |
| C  | -5.85799994625450 | 1.40225364379949  | -0.84887563229834 |
| C  | -3.89301895104893 | 2.21067461469908  | 0.27340949496759  |
| F  | -5.49268487039566 | 3.71284132508952  | -0.59095624659236 |
| C  | -5.43617806203106 | 0.09360490980577  | -0.63775951728246 |
| F  | -7.00099695944164 | 1.64190151645770  | -1.49699533282777 |
| C  | -4.25400345476496 | -0.15306175536053 | 0.03078556514861  |
| C  | -3.46891917800366 | 0.91444623248580  | 0.49811191385794  |
| N  | -2.30387200142987 | 0.44113351666836  | 1.07551516878273  |
| F  | -3.16854008766559 | 3.26903132332895  | 0.66414089918020  |
| F  | -6.18266178848667 | -0.91720735638268 | -1.09350460448752 |
| O  | -3.75033508133984 | -1.35390641204192 | 0.25638939237630  |
| C  | -1.47492699450461 | 1.29599743211897  | 1.80693491475897  |
| C  | -1.88569563261398 | 1.83075809225486  | 3.02409259728619  |
| C  | -1.06267970886955 | 2.64419274710350  | 3.78162204014492  |
| F  | -3.10272563976052 | 1.56348854030566  | 3.48199758437881  |
| C  | 0.21414540180336  | 2.93316380324925  | 3.33359803699900  |
| F  | -1.48723062713057 | 3.14227279963384  | 4.93962680066182  |
| C  | 0.65016851237505  | 2.41586588604726  | 2.12567425191526  |
| F  | 0.10447347551294  | 3.70891241507420  | 4.05828189150278  |
| C  | -0.19423722314693 | 1.6198554714484   | 1.37234055440368  |
| F  | 1.87348621545809  | 2.69732695529694  | 1.68985081334691  |
| F  | 0.24659002202260  | 1.16808509453476  | 0.20790429804115  |
| Si | -2.16429904821597 | -1.36646943762298 | 1.07065347618899  |
| O  | -0.49336160552248 | -1.22444592028485 | 1.64119460819008  |
| N  | -1.47614071790668 | -2.32439092892121 | -0.30923107795171 |
| C  | 0.41280776042317  | -1.81906827140393 | 0.88489481585895  |
| C  | -0.10144004878650 | -2.48036783502994 | -0.24242739840791 |
| C  | -2.24352471018716 | -3.10963193023368 | -1.17318312284736 |
| C  | 1.77115572511803  | -1.79969931928943 | 1.12594639743297  |
| F  | 2.26150078698580  | -1.16533521470283 | 2.19499114759464  |
| C  | 2.64276016963278  | -2.43467954325227 | 0.24804346153851  |
| C  | 0.77541294193822  | -3.09436648779284 | -1.11672988274729 |
| C  | 2.14501158026767  | -3.07399584075508 | -0.86888210387921 |
| C  | 0.34808401963553  | -3.71046455787504 | -2.22873854535458 |
| F  | 3.95746238687540  | -2.42287528788534 | 0.48402904216009  |
| F  | 2.98102539321672  | -3.66861861158410 | -1.72548352296454 |
| C  | -2.92544940455251 | -2.55328293911508 | -2.25062732155882 |
| C  | -2.40197286652005 | -4.47596665093225 | -0.95969848735514 |
| C  | -3.74617466154368 | -3.31350329086088 | -3.06529273195831 |
| F  | -2.79918499002518 | -1.26282483270440 | -2.52010053949954 |
| C  | -3.88705136296679 | -4.66991313927553 | -2.82648180352366 |
| C  | -3.20772246558377 | -5.25410272204672 | -1.77180681264802 |
| F  | -4.39210150605371 | -2.75186821460228 | -4.08217615413022 |
| F  | -4.66781071097534 | -5.41036229668992 | -3.60800921464830 |
| F  | -1.77238303115593 | -5.06238508803881 | 0.05086225377163  |
| C  | -3.34336931966543 | -6.55702177483829 | -1.53814782731280 |
| F  | -2.78312509251299 | -2.31552731436064 | 2.54103130106103  |
| C  | -4.07412175691558 | -2.77186879982916 | 2.64861711027056  |

|   |                   |                   |                  |
|---|-------------------|-------------------|------------------|
| N | -4.26258407463643 | -3.48653198324189 | 3.79934595346298 |
| C | -3.07842789716437 | -3.51602438670067 | 4.49099483362133 |
| C | -2.12168555512975 | -2.79276254876524 | 3.73694091247724 |
| C | -5.48432234787884 | -4.10045115541034 | 4.22526006566836 |
| H | -6.25813830419523 | -3.89861391465105 | 3.48685894440602 |
| H | -5.81087012095222 | -3.69982193866681 | 5.18913364791721 |
| H | -5.36955831606076 | -5.18381928067844 | 4.32253661799709 |
| C | -2.78850716660279 | -4.11876182145562 | 5.70966637235878 |
| C | -1.49827564148671 | -3.99327115013274 | 6.19007242315263 |
| C | -0.82923000665227 | -2.68160264572889 | 4.25971090872159 |
| C | -0.53318157155134 | -3.28015115427839 | 5.47022153949538 |
| H | -3.54183380067943 | -4.66703690910325 | 6.26324202035442 |
| H | -0.07523150074285 | -2.12566040083662 | 3.72133106014379 |
| H | 0.46981015074295  | -3.19509724504186 | 5.87161439885667 |
| H | -1.23237283113930 | -4.45110932762346 | 7.13563670588415 |
| H | -4.89167728372220 | -2.63758550638999 | 1.95799361000456 |

### 1<sup>---</sup>-C<sub>9</sub>H<sub>6</sub>NCH<sub>3</sub><sup>3+</sup>-pos.

|    |                    |                   |                   |
|----|--------------------|-------------------|-------------------|
| C  | -5.79735232002904  | 1.40863323916330  | -0.16777711207822 |
| C  | -6.34984313454740  | 0.16591190096495  | -0.42167314933636 |
| C  | -4.49559256369983  | 1.52035604621268  | 0.31027885051374  |
| F  | -6.51201714751388  | 2.50511838697550  | -0.38957318900037 |
| C  | -5.59737611688241  | -0.97994453664835 | -0.20047101120559 |
| F  | -7.59149175717130  | 0.06678096093461  | -0.88086098238334 |
| C  | -4.30740753303217  | -0.87107388781014 | 0.27704765175388  |
| C  | -3.74302279339337  | 0.38332558758784  | 0.54939620309768  |
| N  | -2.42822241082707  | 0.24749710682893  | 0.98918122573669  |
| F  | -4.00091918484767  | 2.74171571618848  | 0.51034523699751  |
| F  | -6.12176808351833  | -2.17861530940433 | -0.46236360606203 |
| O  | -3.49397401299304  | -1.91064476889521 | 0.46875236170606  |
| C  | -1.74102791221572  | 1.31069961400562  | 1.59095957565858  |
| C  | -2.24364320094844  | 1.95240979822844  | 2.71719376735602  |
| C  | -1.57091886479216  | 2.99013004187330  | 3.33356502367178  |
| F  | -3.41090502541360  | 1.55600351576059  | 3.22815946147442  |
| C  | -0.33793993684030  | 3.38828750123106  | 2.84359867013929  |
| F  | -2.09105930881176  | 3.59295544137277  | 4.39213805703043  |
| C  | 0.20008591857969   | 2.75147833013772  | 1.73653536296504  |
| F  | 0.32100259632182   | 4.37123348930980  | 3.43361061190099  |
| C  | -0.50341608917815  | 1.73203631644612  | 1.1171921731831   |
| F  | 1.37847463752269   | 3.12970843362492  | 1.26840313041782  |
| F  | 0.02997322889940   | 1.14698863529005  | 0.05631654154494  |
| Si | -1.95306298997991  | -1.45701502196713 | 1.12400934643811  |
| O  | -0.41374495553265  | -1.14924088197642 | 1.84601427915606  |
| N  | -1.11929833373264  | -2.47620060992925 | -0.06436310412183 |
| C  | 0.61796982370567   | -1.73463003994346 | 1.22584789357314  |
| C  | 0.26034299604636   | -2.51305429030783 | 0.12048684081055  |
| C  | -1.74179968629637  | -3.17008149606975 | -1.11355612936423 |
| C  | 1.93707716326633   | -1.58806217297307 | 1.60048999907277  |
| F  | 2.26894013615428   | -0.82843224526579 | 2.6402059497157   |
| C  | 2.92818763733100   | -2.23030781773182 | 0.86785697087714  |
| C  | 1.25470662915074   | -3.1388859080146  | -0.60982797571641 |
| C  | 2.58467870244829   | -3.00202494215246 | -0.22725319780071 |
| F  | 0.98375146581756   | -3.86842874893042 | -1.69345931976130 |
| F  | 4.20379143828795   | -2.09736900290409 | 1.21255043951325  |
| F  | 3.53318616691728   | -3.61642055419316 | -0.92508931850470 |
| C  | -2.415054468660230 | -2.48322418712012 | -2.11701641364634 |
| C  | -1.76121957160254  | -4.55798829624614 | -1.16834159354061 |
| C  | -3.11757599852744  | -3.14381486225760 | -3.10803637956876 |
| F  | -2.41534516308776  | -1.15652238577826 | -2.11950826716230 |
| C  | -3.12749791883099  | -4.52890891968316 | -3.13384957061421 |
| C  | -2.43771938394373  | -5.23791429788985 | -2.16502008756417 |
| F  | -3.77948168469794  | -2.45934410770138 | -4.02836206135823 |
| F  | -3.78990590192883  | -5.17231869629730 | -4.08102067268603 |
| F  | -1.11580501136745  | -5.26160334303574 | -0.24900838219074 |
| F  | -2.43721623774918  | -6.56327676919326 | -2.18880087190582 |
| C  | -2.54050788434297  | -2.05655092042088 | 3.09250865801313  |
| C  | -3.92452841648184  | -1.78524949201309 | 3.18970773073049  |
| N  | -4.63014374840103  | -2.88546641991434 | 2.98365510852184  |
| C  | -3.77570433420437  | -3.97641905937700 | 2.82697029096050  |
| C  | -2.45952575447495  | -3.51264207361780 | 2.96219838718600  |
| C  | -6.06404332314866  | -2.95511590441350 | 2.82910999255223  |
| H  | -6.49213475525947  | -1.97928799604446 | 3.04440485193336  |
| H  | -6.47418908469510  | -3.69193293691689 | 3.51933085395676  |
| H  | -6.31054887701545  | -3.23624950508469 | 1.80525387350330  |
| C  | -4.08548185140486  | -5.30672415711027 | 2.59305423485979  |
| C  | -3.0312347157841   | -6.19031183399973 | 2.53348178361625  |
| C  | -1.40689240260049  | -4.41865050678211 | 2.89876039794965  |
| C  | -1.70554369875655  | -5.75298879165916 | 2.69640205525453  |
| H  | -5.10526074861783  | -5.64455870458131 | 2.46303099622890  |
| H  | -0.38105674802454  | -4.08584034727906 | 2.99352472824764  |
| H  | -0.90099351226544  | -6.47482908361965 | 2.64134853517212  |
| H  | -3.21519870268194  | -7.24001627144848 | 2.35362157353150  |

# SUPPORTING INFORMATION

H -1.82258778316151 -1.46456366522714 3.64368159668757  
 H -4.40909852279812 -0.83169429942999 3.33775407297091

**[TS-a-FLP<sup>C2-pos</sup>]\***

C -5.75211683330626 2.96240464516117 -0.46943786533443  
 C -6.54853557064883 1.83806684540096 -0.59290604061710  
 C -4.52643327329991 2.89146329263680 0.18629773663510  
 F -6.16668391666431 4.12380715944025 -0.96663161078096  
 C -6.11767174873582 0.62536011868881 -0.06880925768327  
 F -7.72591023003839 1.91754823703473 -1.20444050191016  
 C -4.89629411653028 0.5547052701917 0.56531039075568  
 C -4.09062765251274 1.68735602204417 0.70647499734285  
 N -2.96117161992757 1.38433813702595 1.45814027567916  
 F -3.80527864201155 4.00833875183903 0.30572245352854  
 F -6.89397549129251 -0.45564612624852 -0.16660866273988  
 O -4.40410770027424 -0.54472017533063 1.13582221561686  
 C -1.82878742217744 2.21819990288750 1.38359975588728  
 C -1.40305644229830 2.98952327405964 2.45660094088434  
 C -0.26461973446216 3.77106621062924 2.38630052935255  
 F -2.08498285844691 2.98285198650891 3.59520572580663  
 C 0.47992369110387 3.80012562993166 1.21890232969634  
 C 0.11272163949518 4.49689239725712 3.42947806370142  
 C 0.07801801516353 3.04515222908647 0.13000296407710  
 F 1.56937629758108 4.54699705630595 1.14764838872113  
 C -1.06180508011498 2.26531373664215 0.22359017745762  
 F 0.78756008882081 3.06403109386280 -0.98848423124437  
 F -1.41807602796327 1.53807857946329 -0.82519236916699  
 Si -2.88495312996721 -0.33843419551787 1.96133607420786  
 O -1.40499220130665 0.02590189863109 2.81739096627314  
 N -1.98495201252212 -1.52804872755395 0.98590248777238  
 C -0.39676868208835 -0.77854643051751 2.47838069722613  
 C -0.67025298373958 -1.66227267159039 1.42306615740444  
 C -2.56506103109090 -2.45782061192047 0.11605118598506  
 C 0.85106423395969 -0.75298712649313 3.06858296708639  
 F 1.10081654100480 0.06879048740192 4.08733667141646  
 C 1.85902033270831 -1.58190516848031 2.58990402282777  
 C 0.34735653358051 -2.46191406015478 0.93659974859185  
 C 1.60702554404991 -2.42508042428319 1.52378742893459  
 F 0.16139709599763 -3.26981890558927 -0.10993255841646  
 F 3.06510803005085 -1.55569236050668 3.14836260886065  
 F 2.57420404696733 -3.20396935183281 1.05120143087979  
 C -3.10596099954558 -2.05973607911975 -1.10228657038830  
 C -2.65725335955948 -3.80923476048745 0.43906597057944  
 C -3.72217283172088 -2.95903257668707 -1.95568327142902  
 F -3.03142950152801 -0.79264092822192 -1.47377168731838  
 C -3.79475703404293 -4.298024343668178 -1.60926160415648  
 C -3.25841736406543 -4.72441545789605 -0.40549233343884  
 F -4.22532774822176 -2.54621326806116 -3.10907670857435  
 F -4.36517257372348 -5.16957108043462 -2.42563266599929  
 F -2.15534177125596 -4.454966912873 1.58826261299192  
 F -3.33058314007320 -6.00467243187925 -0.06617933581893  
 C -3.62481231222944 -1.32454463185471 3.55136708997891  
 N -5.29722206279458 -0.6718157218159 5.22696465124427  
 C -6.07123300868856 1.31994022314279 4.60210364223994  
 C -4.50722281979840 0.53915494374252 6.47511645609891  
 C -5.37612812503984 1.33671866120133 7.45683725761213  
 C -3.25037201652206 1.32583696649326 6.09628235619513  
 C -4.04860950003279 -0.71233825633026 7.22858647946252  
 F -6.09775157364581 2.51592920635146 6.84025646234774  
 H -4.72877063871725 1.65935075812436 8.27640069035911  
 H -6.11513320812950 0.66208105612967 7.90186910476101  
 C -6.91425748864323 2.04228078326183 5.65605772706092  
 C -7.01123266953701 0.80410195772803 3.51599001473429  
 C -5.12764479618085 2.30549788236737 3.91967994272731  
 H -7.70890423999066 1.375523925339639 6.00701630133294  
 H -7.41332083937822 2.88004142210866 5.16270677423372  
 H -5.38650797955444 3.28659547083135 6.53417485910356  
 H -6.74794855533704 2.983247763680914 7.58294107292010  
 C -6.16757149858326 -0.98367583767915 5.48732292037836  
 H -6.67214558917289 -1.27741280304415 4.57540826672964  
 H -6.92247212160884 -0.77880529167561 6.25078259894262  
 H -5.56706561783295 -1.82829239170730 5.80737974101784  
 H -4.87646845347357 -1.25510149668005 7.68280034964636  
 H -3.39628511801550 -0.38739853626411 8.03903606311400  
 H -3.48291986100710 -1.40004527617409 6.60471787480467  
 H -2.76122898143186 0.92008278851756 5.21227206493995  
 H -2.53945643387668 1.27405337758417 6.92100774736758  
 H -3.44214832441828 2.37694384041170 5.909867044008590  
 H -4.34461818129612 1.79821587376424 3.36436940618620  
 H -4.64914387070290 2.99895976251820 4.60188640603637  
 H -5.69784404947496 2.90340924459621 3.20859211392484

H -6.47470768503119 0.23985858959685 2.75521345495574  
 H -7.45378647500331 1.66541794530373 3.01690668962787  
 H -7.83178678672993 0.20205606437634 3.90336514387070  
 H -4.35058337776641 -0.45378824668997 4.25169742161702  
 N -4.44038931627067 -2.47698960460834 3.29085051214831  
 C -2.60815778937752 -1.80801793271005 4.41426872226834  
 C -5.63141078631391 -2.58928175897977 2.48039191868906  
 C -3.95164268614721 -3.54698894321985 3.94678886765196  
 H -6.09104953513452 -1.62224598367370 2.33874584664447  
 H -6.33735927147235 -3.25225914862674 2.98182879128159  
 H -5.40027868024184 -2.98973970681123 1.49246165540136  
 C -2.79530490755689 -3.16152985374909 4.67446004962561  
 H -1.81116343941641 -1.19231107272986 4.796974585224339  
 C -4.42127613195400 -4.86937776135299 3.98146985224307  
 C -2.09948179064502 -4.11035960148907 5.44960536773165  
 C -2.56680708989829 -5.39520222714189 5.47952721696197  
 H -1.21249700145184 -3.82105975616713 5.99936759195274  
 C -2.3071873291928753 -5.76533097155515 4.796223932717412  
 H -2.05095076915957 -6.14823189516873 6.06106671469759  
 H -4.04997073222989 -6.79596569391366 4.78374485745520  
 H -5.28584425912146 -5.18370986090338 3.41295896766931

**[TS-a-FLP<sup>C3-pos</sup>]\***

C -5.50732530099778 3.17909825098942 -0.43476100120805  
 C -6.35262368584449 2.09604615098385 -0.58613982899015  
 C -4.29187062093781 3.04291522688015 0.23045713260447  
 F -5.85387460815949 4.36447675200553 -0.92872410095639  
 C -5.98682404157582 0.86055923612592 -0.06535609868715  
 F -7.50534268133771 2.2322930324194 -1.23384675511141  
 C -4.78559185729697 0.7285390149074 0.59450083797696  
 C -3.92036516750318 1.81669108679417 0.75052751061144  
 N -2.79068811716190 1.43195219135605 1.46426169658435  
 F -3.51799601880770 4.12539516403436 0.34270402693269  
 F -6.79651535279043 -0.19062528218314 -0.20847350991917  
 O -4.35524772573313 -0.40371058927405 1.14803487471154  
 C -1.69751586724828 2.30600036927704 1.60581491998837  
 C -1.68744028107461 3.32161296686661 2.55163117272844  
 C -0.57963891655672 4.12418786578976 2.75554807290509  
 F -2.76684250900534 3.25550085095063 3.29550083797696  
 C 0.55995383199300 3.92278477078838 1.99579428671390  
 C -0.60531057158689 5.07676896103497 3.67881794442702  
 F 0.657193298137397 2.93296913761915 1.02662880998978  
 F 1.63132520714983 4.67410081535156 2.19163893937754  
 C -0.55165673075577 2.14938383937410 0.83338791656347  
 F 1.65917103912094 2.73843532434990 0.29541951711249  
 F -0.50902889204771 1.20622789389336 -0.09604245154161  
 Si -2.75151803640272 -0.32105621501240 1.86984652986473  
 O -1.16748393619426 -0.10359053732171 2.56627928072511  
 N -2.02803696576820 -1.55330460835052 0.77374334862313  
 C -0.26090929378200 -0.97544528094593 2.12541201405664  
 C -0.70554127197231 -1.83138785105281 1.10701788756804  
 C -2.76652477162043 -2.35808454480446 -0.09277164918197  
 C 1.03311011459001 -1.04920024354560 2.59491700531180  
 F 1.45298926836334 -0.22504443066730 3.55597441148962  
 C 1.90793990469232 -1.99223760484968 2.06837736278587  
 C 0.18116658512190 -2.74732484581113 0.57236171983448  
 C 1.48056461411948 -2.83518986251643 1.06139270220052  
 F -0.17045144154040 -3.56793006701404 -0.42204722787216  
 F 3.14952890795562 -2.08434993943914 2.53553789611290  
 F 2.31446084806712 -3.73684920568557 0.55010315796695  
 C -3.39049924849021 -1.81078063627130 -1.21172461123062  
 C -2.98375209754931 -3.71304947846364 0.14354541239061  
 C -4.22671525269242 -2.55656566167606 -2.024070848486932  
 F -3.19313095523247 -0.53763726074617 -1.51591844458548  
 C -4.42981274909871 -3.90071431088501 -1.75590393493474  
 C -3.79575793152168 -4.48150503033678 -0.67050768128260  
 F -4.82837222431851 -1.99211348823923 -3.05963125310384  
 F -5.22021494732884 -4.62685273845629 -2.53169552151611  
 F -2.40427279069009 -4.30295828208362 1.18826318506516  
 F -3.98669047564345 -5.768514525075948 -0.39841675506912  
 C -3.42420353009552 -1.29778068825375 3.43239071482950  
 C -2.47223520078605 -2.02661845484685 4.29558184291103  
 C -4.30619927351419 -2.33521897228212 3.02111611552390  
 N -3.99637103985319 -3.51188149957778 3.55381957550454  
 C -4.68544343831100 -4.75724920073596 3.32524363980239  
 H -4.00473902438640 -5.4829057512389 2.88025192836901  
 H -5.1341998338877 -4.58432399795643 2.64159411540915  
 H -5.07168825300967 -5.15345670760448 4.26555495287873  
 H -2.66821963137478 -3.37017388268461 4.35600382987327  
 H -5.13163302353141 -2.25379475891090 2.33091188846032  
 C -1.33672561611008 -1.64598378579668 5.00649037206582  
 C -2.19912977429741 -4.33864922152112 5.08874602243428



# SUPPORTING INFORMATION

F -2.62668896749680 -6.63085474033108 -1.71106680809703  
 C -2.70098897365693 -1.82767401782849 3.28268673229402  
 C -4.08278748215003 -1.86498568368303 3.28700105225343  
 N -4.47589519928014 -3.06691663931280 2.80991555515219  
 C -3.39216187071521 -3.82471537833632 2.49565049305606  
 C -2.25929337035635 -3.10127179167119 2.78431977514929  
 C -5.84407625574789 -3.43938407423015 2.52741637254067  
 H -6.51214475050072 -2.81613405063418 3.11751406073012  
 H -6.00110828454834 -4.48172260197842 2.79939992784024  
 H -6.06406209843490 -3.30148520389565 1.46920078433768  
 H -2.08669977672585 -1.06213445699823 3.72720286815893  
 H -4.79932552820178 -1.11430419482691 3.57663816419083  
 H -3.50424212055230 -4.80909875944301 2.07269208185945  
 H -1.24385919178640 -3.45859081586476 2.72421577700092

## [TS-b-FLP<sup>C2-pos</sup>]<sup>†</sup>

C -5.58659702306091 3.05225621854566 -0.44543520067860  
 C -6.39881913238214 1.94962317887974 -0.642177693022998  
 C -4.40377469197687 2.93735519348823 0.27934703923641  
 F -5.94160744730573 4.23399319880598 -0.94180938079405  
 C -6.03506359837542 0.71935517960676 -0.10712313061674  
 F -7.52557923597643 2.06439109889923 -1.33818051314353  
 C -4.86189180830434 0.60814869402797 0.60576568103718  
 C -4.02733881854341 1.71239423408935 0.79611835067313  
 N -2.92953065315116 1.36080692047540 1.57274776973249  
 F -3.66381950892003 4.03267903588369 0.46739511639917  
 F -6.82060408565877 -0.34511715320630 -0.28361718311144  
 O -4.43897242681982 -0.51179262700112 1.19253879732204  
 C -1.76374195238510 2.15241084547968 1.53849095669029  
 C -1.37087202415174 2.93544971586349 -2.614677055122052  
 C -0.18059247366649 3.63940380145367 2.61055209932843  
 F -2.13244095966077 2.99892549661102 3.70066605604193  
 C 0.65174320599238 3.57400070375673 1.50568153106010  
 F 0.16867379808672 4.37107798238643 3.65953494781497  
 C 0.28054297521581 2.81189213689121 0.41077337094825  
 F 1.79635741794301 4.23691662969569 1.49618364466340  
 C -0.91431526864148 2.11362665484886 0.43761215074206  
 F 1.07429182990269 2.74658430697904 -0.64711337402982  
 F -1.23743548465899 1.36790855489732 -0.60981768610543  
 Si -2.89223849341598 -0.38700262054733 2.00214416711207  
 O -1.36541463669689 -0.10019107199264 2.81500910252651  
 N -2.04864819088957 -1.54398892164259 0.93642742503015  
 C -0.34045857614258 -0.74910263354548 2.26101984203905  
 C -0.68074837522713 -1.59492918180458 1.19550459399824  
 C -2.64725011589030 -2.43619988249119 0.04160933342631  
 C 0.97790251756029 -0.58766968988074 2.63575054369311  
 F 1.30250145577800 0.24031676260296 3.62815855507177  
 C 1.97899681746410 -1.27906434648739 1.96176970816288  
 C 0.32287466897355 -2.26599050027324 0.52253273524433  
 C 1.64931891448927 -2.11668809803150 0.91344909104311  
 F 0.05819949583991 -3.05434831673306 -0.52345969493312  
 F 3.25004314757069 -1.12957489616392 2.32170348536604  
 F 2.60282040637676 -2.77744488434390 0.26410378305669  
 C -3.22518057219613 -2.00112515019137 -1.14674900719351  
 C -2.69766327575260 -3.80195289994247 0.30708897834815  
 C -3.83964590107681 -2.88064508417742 -2.02234314190081  
 F -3.18214289664298 -0.72046288103643 -1.472306455379033  
 C -3.86721717556880 -4.23509397526615 -1.73377477840462  
 C -3.29225099549286 -4.69811311216888 -0.56188746500505  
 F -4.38080932200259 -2.43510545379783 -3.14520583346287  
 F -4.43149964887178 -5.08519016400184 -2.57624681272247  
 F -2.15596809184788 -4.27160502165990 1.42590889667903  
 F -3.32061724713406 -5.99339720440665 -0.27561340967651  
 C -3.61490784258113 -1.36137548392363 3.56370550988561  
 N -5.33181945514907 0.07874967805572 5.23848790902669  
 C -6.11985659102832 1.21192251873364 4.59150886615269  
 C -4.57514269992075 0.47823962361541 6.50034459465790  
 C -5.48431169107105 1.25727787898586 7.45983857755967  
 C -3.33025766576999 1.29094279872237 6.13811540706977  
 C -4.09744811564177 -0.75622280909367 7.26923135491202  
 C -6.23682197142994 2.40746697359607 6.82447638243877  
 H -4.85986885164315 1.60794975340584 8.28557537870257  
 H -6.20667231810679 0.56272520466617 7.90180824820471  
 C -7.01193979631382 1.90480644811868 5.62346599279420  
 C -7.00474405175243 0.66645330434997 3.47361594929375  
 C -5.18744971276239 2.22923969520980 3.94088281732436  
 H -7.79293373412036 1.21342759293863 5.95713109049990  
 H -7.52609143527121 2.72581979843194 5.11780941386642  
 H -5.54909160317654 3.20405286513624 6.53199889892087  
 H -6.91868453273690 2.85077806432959 7.55330359473743  
 C -6.18848101547393 -1.04858304722526 5.49580023398081  
 H -6.66427466770659 -1.084089856347983 4.575774886178860

H -6.96734033338236 -0.88194978671079 6.23445252790466  
 H -5.57988338029577 -1.91117949351636 5.84488472256852  
 H -4.91852957966866 -1.31955941522195 7.71088961341299  
 H -3.47152034841781 -0.40894793879687 8.09108287104931  
 H -3.499775491105087 -1.42886640620775 6.6586668673541  
 H -2.81849493203419 0.88678764328946 5.26620868719526  
 H -2.63298294840790 1.26024277851119 6.97533603737271  
 H -3.54102209556154 5.23914325379698 9.3914325379698  
 H -4.37009480799456 1.75090922676817 3.41002050665225  
 H -4.75523623504145 2.93861649586446 4.63746684043361  
 H -5.75519942977265 2.80794293819751 3.21235942441201  
 H -6.42020737274916 0.12606150850233 2.73396494068786  
 H -7.45565788617793 1.51318206143361 2.95747930833257  
 H -7.82051993448515 0.04066742954553 3.83305376642150  
 H -4.39639844002171 -0.52027411155726 4.29857231466603  
 N -4.38623921150899 -2.53915192132597 3.28395710171140  
 C -2.60818480308004 -1.85368118971201 4.45257592160952  
 C -5.52905679663236 -2.69731144532376 2.40342164064184  
 C -3.89223771088633 -3.57912800473235 3.94550142044779  
 H -5.21462148298472 -2.77874697024750 1.36592316843890  
 H -6.19878265363852 -1.84847042136521 2.7729346098159  
 H -6.05891412534831 -3.60117023821320 2.69978344798334  
 C -2.78184642138911 -3.19630857658033 4.69352243638943  
 H -1.82433088799086 -1.23142118274497 4.85154517824161  
 H -4.35191883414719 -4.55248208856317 3.85708442216837  
 H -2.18587264832446 -3.84197656103252 5.31762316985619

## [TS-b-FLP<sup>C3-pos</sup>]<sup>†</sup>

C -5.55327307874353 3.07040420873030 -0.45586734193052  
 C -6.37113348246728 1.97264262810559 -0.65679156874501  
 C -4.37487606712755 2.94740953736314 0.27415050949247  
 F -5.89846518273061 4.25471406718823 -0.95374067291445  
 C -6.01784755922515 0.73999879908262 -0.12051132951546  
 F -7.49324452530810 2.09461076024550 -1.35971486537705  
 C -4.84808719332127 0.62008464878300 0.59748174208667  
 C -4.00710616052773 1.7919374699914772 0.790341699914772  
 N -2.91622344246877 1.36704135373754 1.57769023057152  
 F -3.63095763766335 4.03903756322404 0.47005356975450  
 F -6.0912650796735 -0.30273909266323 -0.30273909266323  
 O -4.43882111609225 -0.50177910167707 1.18956062509528  
 C -1.74506264921158 2.14942988700121 1.54151480401450  
 C -1.35442116948546 2.94110029043376 2.61228585049257  
 C -0.16454474521780 3.64601269383047 2.60328771456245  
 F -2.12281483718377 3.02071337713944 3.69135324098248  
 C 0.6673494493940 3.57486908076647 1.49836420223692  
 F 0.18275867131217 4.38876781621351 3.64499025553650  
 C 0.29732536521281 2.80541214999074 0.40837153606182  
 F 1.81003951958698 4.24133328212332 1.48378322558117  
 C -0.89589327671146 2.10452660962739 0.44031952960912  
 F 1.08929250047711 2.73745362407346 -0.65091809246347  
 F -1.22046452806941 1.35765517116407 -0.60546845672511  
 Si -2.89134641722009 -0.37282188949103 2.02057656634564  
 N -1.39285378716514 -0.11468108828957 2.89730225363515  
 O -2.00954351320988 -1.48989615848496 0.93967673605451  
 C -0.34839334831785 -0.73622359938814 2.34877082135997  
 C -0.65096032004402 -1.54269741699714 1.24109860810188  
 C -2.59265782124904 -2.40380299880145 0.05893372894599  
 C 0.95652107904628 -0.59667024946847 2.77683750236680  
 F 1.24899138622615 0.17930753392645 3.82022286350614  
 C 1.97919870921790 -1.26340904981722 2.11013533653766  
 C 0.37399275337502 -2.19030814605258 0.57756095367957  
 C 1.68668463850583 -2.05845711120795 1.01807155893584  
 F 0.13918726018761 -2.94223696085066 -0.50253358192128  
 F 3.23672793220080 -1.13178777178337 2.52169677384236  
 F 2.66260305788119 -2.69582156253926 0.37755316452999  
 C -1.7409948792117 -1.99795044804293 -1.13855571404739  
 C -2.63465769107846 -3.76480849582337 0.34795507291513  
 C -3.77689841464376 -2.89941580830930 -2.00014646331318  
 F -3.14493184190691 -0.72401364416722 -1.48742563131272  
 C -3.79966510329641 -4.24778382867058 -1.68420725217176  
 C -3.22495950167428 -4.68117075497708 -0.50170245112561  
 F -4.31429776742364 -2.48009457970799 -3.13489142848660  
 F -4.36112988313387 -5.11909812711114 -2.50709848225681  
 F -2.08741192944857 -4.21484842285733 1.47521652323643  
 F -3.25192074935371 -5.97083302031491 -0.18188326181502  
 C -3.64507885424637 -1.37852816702049 3.51918418403898  
 C -2.69938196681555 -2.09971378591715 4.36527141902342  
 C -4.51887823827855 -2.40960613845690 3.07464661594839  
 N -4.16026174239666 -3.57859115200927 3.5918418403898  
 C -4.77735310385650 -4.85504059420872 3.31375851231708  
 H -4.06551673058144 -5.51033843331409 2.81154339811466  
 H -5.63623391798560 -4.7001488563821 2.66496897039657

# SUPPORTING INFORMATION

|                                        |                   |                   |                   |    |                    |                    |                   |
|----------------------------------------|-------------------|-------------------|-------------------|----|--------------------|--------------------|-------------------|
| H                                      | -5.10832158691228 | -5.32392332723813 | 4.24059452457574  | C  | -2.54888364092597  | -5.19434216319168  | -1.88223118612342 |
| C                                      | -3.04001275342729 | -3.40590804159305 | 4.39388276164969  | F  | -4.00938670030391  | -2.41581762483495  | -3.65517613855065 |
| H                                      | -5.34207087327420 | -2.33671544294677 | 2.38204738947887  | F  | -4.03787786192277  | -5.12862512763293  | -3.69148695520416 |
| H                                      | -1.84925537764519 | -1.65702412828548 | 4.85695968057212  | F  | -1.10460663438925  | -5.21696974790809  | -0.05496369943930 |
| H                                      | -2.58537379829662 | -4.25328725211814 | 4.88108223858429  | F  | -2.55623365487178  | -6.51816203575973  | -1.8958030942340  |
| N                                      | -5.2820969282284  | 0.04933273508263  | 5.24267801263082  | C  | -2.54209859592829  | -2.16528211183221  | 2.95469341196727  |
| C                                      | -6.12960243387191 | 1.13083537626528  | 4.59079846389274  | H  | -3.49256197986416  | -2.28866890107809  | 1.95891981518088  |
| C                                      | -4.51390572713720 | 0.49138780263668  | 6.47611857802081  | C  | -3.25823729962173  | -1.40898674700041  | 3.91149710825254  |
| C                                      | -5.42898950275699 | 1.25117734242789  | 7.44442809756315  | C  | -3.19615496691196  | -2.06399973603682  | 5.13317658009876  |
| C                                      | -3.30312081727174 | 1.33135806984696  | 6.07350022437818  | C  | -2.427245599219217 | -3.20192611003338  | 4.92933103696751  |
| C                                      | -3.96959174645618 | -0.71552578462944 | 7.24390172806390  | N  | -2.03897678332500  | -3.26115301325038  | 3.65160650604097  |
| C                                      | -6.23626597432085 | 2.36261926182898  | 6.80562183758812  | C  | -1.18226004970097  | -4.27753461719869  | 3.08693373924706  |
| H                                      | -4.80442654316186 | 1.63745223895565  | 8.25396406182031  | H  | -3.65442655339692  | -1.76777058086465  | 6.06216017545944  |
| H                                      | -6.11745710732121 | 0.53603724582486  | 7.90770995707242  | H  | -2.14968411464793  | -3.97904572773031  | 5.62537538137205  |
| C                                      | -7.02134785029087 | 1.81311065767350  | 5.63065270732580  | H  | -3.77254024434161  | -0.48476992167671  | 3.69744414523890  |
| C                                      | -7.02023047264283 | 0.51152803769151  | 3.51319355001466  | H  | -0.98856559326340  | -5.03558154587138  | 3.84235680924517  |
| C                                      | -5.25593070744752 | 2.17243332891892  | 3.89402801171543  | H  | -1.65802297617243  | -4.7455292540020   | 2.22801458703338  |
| H                                      | -7.76883827610159 | 1.1009294303119   | 5.99492418401581  | H  | -0.23344235630720  | -3.84317448658702  | 2.76981701768626  |
| H                                      | -7.57634489698574 | 2.60708152674906  | 5.12469505040176  |    |                    |                    |                   |
| H                                      | -5.58272461640211 | 3.17713274250461  | 6.48494045447704  |    |                    |                    |                   |
| H                                      | -6.91717936006978 | 2.36523997658267  | 7.54180982118246  |    |                    |                    |                   |
| C                                      | -6.07217869873244 | -1.15106037136106 | 5.51145215131765  |    |                    |                    |                   |
| H                                      | -6.52501103831851 | -1.50393632288008 | 4.59078313171545  |    |                    |                    |                   |
| H                                      | -6.86769904277660 | -0.98693278912664 | 6.24278603155058  |    |                    |                    |                   |
| H                                      | -5.42233688062410 | -1.94149653132609 | 5.87291235930324  |    |                    |                    |                   |
| H                                      | -4.75514258434297 | -0.3206339605235  | 7.71930142236363  |    |                    |                    |                   |
| H                                      | -3.32614513489831 | -0.34016817327049 | 8.03948288451255  |    |                    |                    |                   |
| H                                      | -3.37131991331529 | -1.37174993598561 | 6.61501359955003  |    |                    |                    |                   |
| H                                      | -3.55377050163670 | 2.34001108435632  | 5.76728805624202  |    |                    |                    |                   |
| H                                      | -2.74461782082843 | 0.86557467717457  | 5.26148034027869  |    |                    |                    |                   |
| H                                      | -2.63439747900187 | 1.41328782594359  | 6.93055216318264  |    |                    |                    |                   |
| H                                      | -5.85032500026951 | 2.68113913730323  | 3.13552455018885  |    |                    |                    |                   |
| H                                      | -4.40174634622766 | 1.72485429848507  | 3.39502075085000  |    |                    |                    |                   |
| H                                      | -4.87711233053529 | 2.93873711542575  | 4.56271925258998  |    |                    |                    |                   |
| H                                      | -7.82169713558452 | -0.10057243845329 | 3.92568820143124  |    |                    |                    |                   |
| H                                      | -6.44587755806844 | -0.08037605102756 | 2.79938805338172  |    |                    |                    |                   |
| H                                      | -7.49099767887443 | 1.32048731155590  | 2.95606191094529  |    |                    |                    |                   |
| H                                      | -4.34851168721702 | -0.53168946095279 | 4.24170240497168  |    |                    |                    |                   |
| <b>[TS-b-ELC-O<sup>C2-pos.</sup>]†</b> |                   |                   |                   |    |                    |                    |                   |
| C                                      | -5.64827034781059 | 1.48862056587355  | -0.21752251838743 | C  | -5.72346953770442  | 1.62875966193033   | -0.42062593144435 |
| C                                      | -6.28649101507822 | 0.27162368309806  | -0.37361207904797 | C  | -6.34323867899413  | 0.41728952432974   | -0.66504922718812 |
| C                                      | -4.35259428924595 | 1.55680311338673  | 0.28242742049288  | C  | -4.46480597098840  | 1.68079754694604   | 0.16946003805296  |
| F                                      | -6.27406955727009 | 2.60776058647107  | -0.55074960355777 | F  | -6.33096804451688  | 2.75959832537835   | -0.75087505366031 |
| C                                      | -5.62125788836318 | -0.89576009818492 | -0.02449867860626 | C  | -5.69399499705400  | -0.76161439651742  | -0.32079214873491 |
| F                                      | -7.51897803195671 | 0.21769444186654  | -0.85808559374697 | F  | -7.54607044390964  | 0.37968656673087   | -1.22279248813650 |
| C                                      | -4.34190762608973 | -0.82126812128875 | 0.48174626903911  | C  | -4.45350754756732  | -0.7035598393123   | 0.27563524311714  |
| C                                      | -3.68310318178636 | 0.39973352269368  | 0.64790356857971  | C  | -3.81853960961970  | 0.51270278679596   | 0.53744443619129  |
| N                                      | -2.38237801178426 | 0.25313793635442  | 1.12298732413310  | N  | -2.55786466464428  | 0.34805131612256   | 1.108254004669871 |
| F                                      | -3.78858002226424 | 2.75916581837571  | 0.38500496097554  | F  | -3.14717508984569  | 2.8801701627722    | 0.35871390151695  |
| F                                      | -6.21482885544185 | -0.26971993151877 | -0.19201792724720 | F  | -6.26728174531645  | -1.93129312220740  | -0.57433105860245 |
| O                                      | -3.58659919518879 | -1.90745634343575 | 0.78070558764093  | O  | -3.72141928590729  | -1.79470340504169  | 0.59871437776545  |
| C                                      | -1.59667794005806 | 1.37415182986998  | 1.44880341238407  | C  | -1.78061172621379  | 1.46112897254761   | 1.48086820359763  |
| C                                      | -1.88653588894133 | 2.5593520475292   | 2.55945350733444  | C  | -2.07886376670977  | 2.19357724636236   | 2.62129933089576  |
| C                                      | -1.09813409472660 | 3.23335174317224  | 2.91543057064260  | C  | -1.29103347348660  | 3.25384371525398   | 3.02941869390673  |
| F                                      | -2.95357800394542 | 1.86935046982559  | 3.29906078472112  | F  | -3.14717508984569  | 1.87128691680590   | 3.34498110712511  |
| C                                      | 0.02331909544184  | 3.536114435972539 | 2.15954467656047  | C  | -0.16378741058676  | 3.58610944802635   | 2.29493033786176  |
| F                                      | -1.40406691368051 | 3.96897385014723  | 3.97291608405968  | C  | -1.60203009834000  | 3.94398721076369   | 4.11643189150411  |
| C                                      | 0.33644002742737  | 2.77147973749228  | 1.04730680843567  | C  | 0.15701171993452   | 2.86944431323210   | 1.15309823787200  |
| F                                      | 0.79345846245372  | 4.55427349062274  | 2.49912421610177  | F  | 0.60713834336126   | 4.58586787523570   | 2.68422758873805  |
| C                                      | -0.47679561953455 | 1.70788208814014  | 0.69842512869262  | C  | -0.65488997305412  | 1.82353725702945   | 0.75345908426007  |
| F                                      | 1.40486792726362  | 3.06519267040044  | 0.32423421053592  | F  | 1.23430408631060   | 3.18881876551351   | 0.45418866208868  |
| F                                      | -0.16145004575703 | 0.98614161360345  | -0.36787475056202 | F  | -0.32874880680542  | 1.14022494456821   | -0.33413269725043 |
| Si                                     | -1.80186354772652 | -1.39582883395990 | 1.36638726062206  | Si | -1.97353982149268  | -1.30350638994756  | 1.31389868376595  |
| O                                      | -0.23858271280490 | -1.00690477673362 | 1.93076585731056  | O  | 0.46302722241182   | -0.867774817380421 | -1.94478108771295 |
| N                                      | -1.08886393436717 | -2.42865833681334 | 0.11989255196024  | N  | -1.18880851946279  | -2.34880568872787  | 0.13066802237351  |
| C                                      | 0.74562343388513  | -1.53718985232855 | 1.18985043516414  | C  | 0.57471012441979   | -1.47427609255710  | 1.32571939728848  |
| C                                      | 0.31054019299325  | -2.37108310663377 | 0.15342910671269  | C  | 0.20206146053265   | -2.33676289450838  | 2.28806431495957  |
| C                                      | -1.77450365948957 | -3.12377949966534 | -0.89006329977958 | C  | -1.81151310368936  | -3.12773956329039  | -0.85468870554083 |
| C                                      | 2.08555062157113  | -1.27286408410555 | 1.37857750643534  | C  | 1.90276437972097   | -1.25958184846466  | 1.62855544378510  |
| F                                      | 2.48858476547590  | -0.44352664368089 | 2.33451909938835  | F  | 2.52542591021325   | -2.794367136140991 | -0.10791775826110 |
| C                                      | 3.02201582818414  | -1.86654071944964 | 0.54113379334412  | F  | 0.89527198912974   | -3.81470258168345  | -1.43685936170656 |
| C                                      | 1.25059416235692  | -2.95642966423393 | -0.67470101172729 | F  | 4.16665962536190   | -1.74086926500035  | 1.19918997559705  |
| C                                      | 2.60429154760314  | -2.70569704120136 | -0.47454405019221 | F  | 3.46218813157718   | -3.44090448473423  | -0.79225306906373 |
| F                                      | 0.90205803718209  | -3.75620403318872 | -1.68315717328578 | C  | -2.44667017483826  | -2.53399262497226  | -1.93803795695782 |
| F                                      | 4.31473274543734  | -1.62570521098307 | 0.71587218243118  | C  | -1.86783277224489  | -4.51197198628855  | -0.75769972466528 |
| F                                      | 3.50088150559471  | -3.27244332186537 | -1.27267547782868 | C  | -3.12916730021570  | 3.28305139698866   | -2.88017300917298 |
| C                                      | -2.50709162036217 | -2.43909570398088 | -1.85191145547545 | F  | -2.42783083073188  | -1.21483383094117  | -2.06551704299547 |
| C                                      | -1.80465722480633 | -4.51193069034866 | -0.93788173657655 | C  | -3.16330224914540  | -4.66304440282965  | -2.76170800126228 |
| C                                      | -3.28378153499424 | -3.10019753996116 | -2.78615912892557 | C  | -2.52384764023124  | -5.28200877167555  | -1.69916797212889 |
| F                                      | -2.49567572002853 | -1.11303577339234 | -1.86315642316204 | F  | -3.74771819242993  | -2.68860250837804  | -3.88795964282820 |
| C                                      | -3.30322587127988 | -4.48491132503019 | -2.80267943483879 | F  | -3.80783077699433  | -5.39052178103895  | -3.65665891302382 |
|                                        |                   |                   |                   | F  | -1.28182498751377  | -5.12096304707597  | 0.27161707763544  |
|                                        |                   |                   |                   | F  | -2.55654262333284  | -6.60124375687806  | -1.58427651666174 |
|                                        |                   |                   |                   | C  | -2.74948934474253  | -2.20495747320895  | 2.80874589266225  |
|                                        |                   |                   |                   | C  | -2.49394137555263  | -3.54132265479046  | 3.15204502676945  |
|                                        |                   |                   |                   | N  | -2.78673912707918  | -3.72829306770424  | 4.44123922197020  |
|                                        |                   |                   |                   | C  | -3.22589367854665  | -2.54077868285281  | 4.99442707862087  |
|                                        |                   |                   |                   | C  | -3.21233917457786  | -1.58766048006979  | 5.02833010979927  |
|                                        |                   |                   |                   | C  | -2.69974712274966  | -4.98208710011439  | 5.1551979004286   |
|                                        |                   |                   |                   | H  | -2.04818104018228  | -4.87476806171261  | 6.02207073684703  |
|                                        |                   |                   |                   | H  | -2.28729685944555  | -5.73995999396361  | 4.49354146954623  |
|                                        |                   |                   |                   | H  | -3.68877820408174  | -5.298887820076091 | 5.48692650513877  |
|                                        |                   |                   |                   | H  | -2.13112746604221  | -4.35023170175493  | 2.53607586967820  |
|                                        |                   |                   |                   | H  | -3.51334103975387  | -2.49602046007566  | 6.03223781186935  |
|                                        |                   |                   |                   | H  | -3.49779103555970  | -0.55455571869548  | 4.14597495417367  |
|                                        |                   |                   |                   | H  | -3.65961744807413  | -2.16001486933687  | 1.80658188475756  |

# SUPPORTING INFORMATION

## [TS-b-ELC-N<sup>C2-pos</sup>]<sup>†</sup>

|    |                   |                   |                   |
|----|-------------------|-------------------|-------------------|
| C  | -5.85507644015514 | 2.11255461974060  | 0.07807010443857  |
| C  | -6.10839885270802 | 1.12534054191345  | -0.86014445089608 |
| C  | -4.73835842509936 | 2.02715831946334  | 0.90018327385436  |
| F  | -6.9168684967987  | 3.13265880369529  | 0.20695914564068  |
| C  | -5.23710584707001 | 0.05108048653442  | -0.99343390281510 |
| F  | -7.18886603043786 | 1.19706696777483  | -1.62244094235299 |
| C  | -4.12449480092552 | -0.02304022887334 | -0.18091711635162 |
| C  | -3.86389274545637 | 0.96213937790311  | 0.77275419763249  |
| N  | -2.71068674962971 | 0.67649103815255  | 1.51798204144803  |
| F  | -4.53848613551216 | 2.97899048884573  | 1.80678843419312  |
| F  | -5.48136932579644 | -0.89246304623469 | -1.89401656870070 |
| O  | -3.23480968747981 | -1.02619641710279 | -0.26518071572696 |
| C  | -1.90354835232431 | 1.73694355385078  | 1.97952676765759  |
| C  | -1.83218741924532 | 2.04004050137003  | 3.33154287974262  |
| C  | -0.96728286268242 | 3.00738587828742  | 3.81268032150014  |
| F  | -2.60714155472783 | 1.39005953958787  | 4.19348026641253  |
| C  | -0.15261375318227 | 3.69563770905825  | 2.92937549171684  |
| F  | -0.91825251908959 | 3.27748683159297  | 5.10795576133167  |
| C  | -0.21609206883524 | 3.42066917994559  | 1.57149009651227  |
| F  | 0.68444003713802  | 4.61242305900852  | 3.38203608355016  |
| C  | -1.08923461167461 | 2.45247087020806  | 1.11078900491573  |
| F  | 0.56811599200636  | 4.07275924751891  | 0.72976720169094  |
| F  | -1.13082713612526 | 2.18618011778852  | -0.18702666764449 |
| Si | -1.97567565144812 | -1.09326670022364 | 0.85430596380501  |
| O  | -0.43973614100199 | -0.45220399527855 | 1.12007509385984  |
| N  | -1.23133594529594 | -2.51175323746525 | 0.06239110902914  |
| C  | 0.56761896495491  | -1.27937626028326 | 0.76318252755145  |
| C  | 0.15029909392325  | -2.46942106906060 | 0.15978286933406  |
| C  | -1.88516488156710 | -3.43140677009077 | -0.76797794741543 |
| C  | 1.90230145433014  | -0.98974988063758 | 0.93606505679769  |
| F  | 2.28564512949314  | 0.15661427607648  | 1.48758414568075  |
| C  | 2.85527102587676  | -1.91135986974150 | 0.51519850039609  |
| C  | 1.10464857168338  | -3.38750898560380 | -0.23948011666026 |
| C  | 2.45406470096657  | -3.10167692663862 | -0.06660887813099 |
| F  | 0.76140331418176  | -4.55268559055383 | -0.79210268986752 |
| F  | 4.14700572987854  | -1.65268840804916 | 0.67993314349316  |
| F  | 3.36372585113531  | -3.98499264893431 | -0.45909705406140 |
| C  | -1.91897438411195 | -3.24841672474439 | -2.14692559871006 |
| C  | -2.56143177259272 | -4.52829180573481 | -0.24921594287086 |
| C  | -2.60037810876987 | -4.11770115231140 | -2.97907678017289 |
| F  | -1.28985289863750 | -2.21452094031654 | -2.68257279959683 |
| C  | -3.27327197854762 | -5.20012799333812 | -2.43386236744277 |
| C  | -3.25721003134686 | -5.40526335750973 | -1.06427592051568 |
| F  | -2.62392227171759 | -3.91729069285554 | -4.28669471422649 |
| F  | -3.92879009995213 | -6.03521920598488 | -3.22104614394748 |
| F  | -2.54943588844170 | -4.75667377325498 | 1.06074683645249  |
| F  | -3.89920475769304 | -6.44051764248014 | -0.54070492138793 |
| C  | -2.65311906980417 | -1.66477884859893 | 2.55691944060903  |
| N  | -3.75677514986042 | -2.49660310967166 | 2.77409223626164  |
| C  | -3.59124271966914 | -3.17446364374360 | 3.91089743169440  |
| C  | -2.37461435633944 | -2.83008946282013 | 4.49221855610205  |
| C  | -1.78846274470204 | -1.89967936523035 | 3.65339714221673  |
| H  | -2.91660455465827 | -0.36281459995513 | 2.43157311937957  |
| C  | -4.91558010120290 | -2.59959113623671 | 1.91649148367020  |
| H  | -4.62185821778386 | -2.88520206808977 | 0.90771907721164  |
| H  | -5.44525115137093 | -1.64745749707572 | 1.87265914592144  |
| H  | -5.58304558850335 | -3.35762114713855 | 2.31898166854447  |
| H  | -0.83667749010660 | -1.40908820963645 | 3.78905421895277  |
| H  | -1.98746673840507 | -3.21717719374575 | 5.42028201676501  |
| H  | -4.34991500420038 | -3.85890180615264 | 4.25913038264699  |

## [TS-b-ELC-N<sup>C3-pos</sup>]<sup>†</sup>

|   |                   |                   |                   |
|---|-------------------|-------------------|-------------------|
| C | -5.90048756063603 | 1.95169162163851  | 0.30288809456168  |
| C | -6.16145185141667 | 0.93754456160066  | -0.60453570047303 |
| C | -4.72311599828832 | 1.94488555429631  | 1.03726583117826  |
| F | -6.78810577535711 | 2.91998202435520  | 0.48423225882116  |
| C | -5.23580800131000 | -0.07984411744866 | -0.79688530811992 |
| F | -7.30278205114165 | 0.93224508201806  | -1.27775091748681 |
| C | -4.05759517526762 | -0.07270678355922 | -0.07522438499048 |
| C | -3.79123693154500 | 0.93801761476211  | 0.85094738314259  |
| N | -2.57875394955703 | 0.73287093919011  | 1.52167779706661  |
| F | -4.51087119603367 | 2.921711332901865 | 1.91425342043651  |
| F | -5.49111820642498 | -1.05062172153339 | -1.66540696826005 |
| O | -3.11390009891286 | -1.01771807879848 | -0.22765543699415 |
| C | -1.78781590078221 | 1.82914252664697  | 1.90661059471228  |
| C | -1.17590956896924 | 1.83056835131471  | 3.15361102028679  |
| C | -0.33395805088137 | 2.84622724575220  | 3.56175704873288  |
| F | -1.39181204507293 | 0.81392023509702  | 3.98503415149341  |
| C | -0.09064896459579 | 3.91308196709107  | 2.71415855363192  |
| F | 0.23094088140620  | 2.80367839159418  | 4.75855765315293  |
| C | -0.69412720524288 | 3.94668079074709  | 1.46799071974476  |

|    |                    |                   |                   |
|----|--------------------|-------------------|-------------------|
| F  | 0.71452863534614   | 4.89061351236415  | 3.09226585892238  |
| C  | -1.51897819724285  | 2.90812293787955  | 1.07096706287359  |
| F  | -0.46761838105493  | 4.96694711154809  | 0.65588504727513  |
| F  | -2.04913924602407  | 2.95049474845806  | -0.14627761010660 |
| Si | -1.84499839487167  | -1.06003620411832 | 0.88365120996143  |
| O  | -0.31796964516424  | -0.38576996409205 | 1.10766735187194  |
| N  | -1.08182040428398  | -2.48975229198120 | 0.13386873860712  |
| C  | 0.70172106347721   | -1.20309068892027 | 0.76015333119731  |
| C  | 0.29888894950506   | -2.41984779333567 | 0.20024125302585  |
| C  | -1.75991676844726  | -3.48434490925036 | -0.58081902691163 |
| C  | 2.03312108566853   | -0.88750293617460 | 0.91295983802300  |
| F  | 2.40481283984001   | 0.27919756286742  | 1.42819002757214  |
| C  | 2.99714219643491   | -1.80826054629645 | 0.51470153934241  |
| C  | 1.26422884078059   | -3.33369854150774 | -0.18078322396644 |
| C  | 2.61018435273621   | -3.02232362719879 | -0.02557967310455 |
| F  | 0.93469750074444   | -4.52065646755964 | -0.69519181037667 |
| C  | 4.28661859195003   | -1.52568379785186 | 0.66155740750979  |
| F  | 3.53079104470675   | -3.90514311251586 | -3.9383639537598  |
| C  | -1.85701730069254  | -3.42568228909137 | -1.96757354828187 |
| C  | -2.42173936977172  | -4.52205688917382 | 0.06374669190593  |
| C  | -2.59856892792754  | -4.34747562881137 | -2.68377494512342 |
| F  | -1.23446370841611  | -2.45836238281311 | -2.62166658417651 |
| C  | -3.27600427926360  | -5.35278261955035 | -2.01126156930011 |
| C  | -3.18511793881206  | -5.44267998505468 | -0.52938637812914 |
| F  | -2.68053737473760  | -4.26871516823766 | -4.00186268991522 |
| F  | -4.00723706505359  | -6.22267217528755 | -2.68637475827516 |
| F  | -2.33462898874029  | -4.65024820551574 | -1.38932393706438 |
| C  | -3.82435840217335  | -6.40900765894803 | 0.01491290020721  |
| C  | -2.60311989118281  | -1.64685507139910 | 2.53187818055875  |
| C  | -3.84434709646481  | -2.30767836260581 | 2.56594306631991  |
| N  | -3.87949095954714  | -3.12597126142094 | 3.61692939112218  |
| C  | -2.68109276907503  | -3.04925545386510 | 4.30421200786628  |
| C  | -1.87880262138414  | -2.16087808847806 | 3.69971840713443  |
| C  | -4.96942987833722  | -4.00560941802175 | 3.97105631759533  |
| H  | -4.65576253854179  | -5.04551033781539 | 3.87682158761719  |
| H  | -5.805415688174715 | -3.82603616006525 | -3.92939405107107 |
| H  | -5.28928018314802  | -3.81636480428563 | 4.99552422291122  |
| H  | -2.74368899891878  | -0.32792621097291 | 2.43816725666057  |
| H  | -4.6879940595563   | -2.23829912591031 | 1.88524540799512  |
| H  | -2.52432824038914  | -3.64141723931820 | 5.19098298471308  |
| H  | -0.88382479379177  | -1.87391998761930 | 3.96752462548107  |

## thiophene

|   |                   |                   |                   |
|---|-------------------|-------------------|-------------------|
| C | -5.46805537923536 | 1.19517833053200  | 0.00006434128883  |
| C | -4.75356726650398 | 0.03317723877908  | -0.00005083333486 |
| C | -3.35450542049650 | 0.25853160583869  | -0.00005034495879 |
| H | -5.21089919448109 | -0.94647083426280 | -0.00002865068218 |
| S | -4.44280182723024 | 2.55755205107475  | -0.00029171872275 |
| H | -6.53924091467948 | 1.31956029941388  | 0.00016072251263  |
| C | -3.04097921903709 | 1.58589441576483  | 0.00006480938029  |
| H | -2.06284632844282 | 2.04002739895573  | 0.00016018449941  |
| H | -2.61260444989341 | -0.52795050609617 | -0.00002850998258 |

## [2e]<sup>-</sup>

|    |                    |                   |                    |
|----|--------------------|-------------------|--------------------|
| C  | -5.52395936328936  | 2.31120996146749  | -0.22919043188293  |
| C  | -6.17001176184113  | 1.16434961643696  | -0.64369941567997  |
| C  | -4.24314323541606  | 2.24546097272304  | 0.31046270264376   |
| F  | -6.12919748953310  | 3.49597647062503  | -0.34854095541033  |
| C  | -5.53813408737629  | -0.06787919978819 | -0.51879686997504  |
| F  | -7.39823480030852  | 1.24052174368185  | -1.161868082353977 |
| C  | -4.27250009790099  | -0.13681072126036 | 0.02623550727559   |
| C  | -3.60878244017331  | 1.02507958965549  | 0.45270397510522   |
| N  | -2.34184822422625  | 0.71337727419670  | 0.92236811518702   |
| F  | -3.65999754438263  | 3.39579513291046  | 0.67607912677728   |
| F  | -6.16544544528637  | -1.17342646540674 | -0.92454459963707  |
| O  | -3.57954265998649  | -1.25445342373983 | 0.174448538530520  |
| C  | -1.58635809314926  | 1.65519899981066  | 1.62596174863652   |
| C  | -2.00968802677863  | 2.14716298392226  | 2.85701674632117   |
| C  | -1.24282324218140  | 3.03057545649452  | 3.59467954951837   |
| F  | -3.17856154018306  | 1.75822466616362  | 3.35008641574677   |
| C  | -0.00879232778148  | 3.43099625035646  | 3.11340996791750   |
| F  | -1.67685306198369  | 3.48716668512202  | 4.76619838735743   |
| C  | 0.43599836322943   | 2.96204240865160  | 1.88931103644760   |
| F  | 0.74580066352367   | 4.26419859154779  | 3.82276210805326   |
| C  | -0.35258391584576  | 2.09334810115460  | 1.155635145468676  |
| F  | 1.61528238461177   | 3.36036648147331  | 1.42254123994705   |
| F  | 0.09803725414068   | 1.67695647391319  | -0.01796505145502  |
| Si | -2.01772403477933  | -1.06819280491896 | 0.96967140528678   |
| O  | -0.372412073185315 | -0.74680116579426 | 1.50989157731033   |
| N  | -1.27178756653637  | -2.16862397711476 | -0.26301260006543  |
| C  | 0.54154672551034   | -1.55216205867099 | 0.99310295978399   |
| C  | 0.07258045686103   | -2.40444981479629 | -0.02256439905950  |

# SUPPORTING INFORMATION

|   |                   |                    |                   |
|---|-------------------|--------------------|-------------------|
| C | -2.01385732242296 | -2.96896917599619  | -1.13512005169120 |
| C | 1.86782328648781  | -1.57560489755105  | 1.37319943470972  |
| F | 2.32018604885764  | -0.75480413592501  | 2.32430297543077  |
| C | 2.74689205245646  | -2.46626314141238  | 0.76784685122615  |
| C | 0.96157832242781  | -3.27492676771118  | -0.62596918508964 |
| C | 2.29266119542139  | -3.31250870629012  | -0.22203219021707 |
| F | 0.58427722815472  | -4.10762308627197  | -1.60534435812325 |
| F | 4.02496402105492  | -2.50984024058602  | 1.15027323357804  |
| F | 3.13367568440626  | -4.17891046966192  | -0.79372889302718 |
| C | -2.63810060224861 | -2.41098607520860  | -2.24699467089279 |
| C | -2.22940442645663 | -4.32299400917718  | -0.90091124448112 |
| C | -3.46196090296149 | -3.15470407008103  | -3.07220466973952 |
| F | -2.46463675864634 | -1.127072720558411 | -2.52754182475913 |
| C | -3.65648529402083 | -4.50085248630174  | -2.81531829832220 |
| C | -3.03093082747134 | -5.0878455525821   | -1.72940194336302 |
| F | -4.06636289493858 | -2.58595657824103  | -4.11056939506600 |
| F | -4.43814494210859 | -5.22774985271963  | -3.60779602020864 |
| F | -1.66078875087777 | -1.66078875087777  | 0.14486832637931  |
| F | -3.21793615695351 | -6.38068541038746  | -1.47951387000605 |
| C | -2.53095779714812 | -1.93400363744066  | 2.54076563803300  |
| C | -1.78900645437335 | -2.17898876682481  | 3.67242953685310  |
| S | -4.10153013285523 | -2.59995923279184  | 2.73359704604682  |
| C | -3.76753792563367 | -2.8860785938598   | 4.29472371323046  |
| C | -2.48788768995091 | -3.18915201885857  | 4.67327026972056  |
| H | -4.51697003528892 | -3.72479341730793  | 4.85673985248306  |
| H | -2.06461844954035 | -3.17436362869636  | 5.62825810556605  |
| H | -0.76499259245391 | -1.84502596276358  | 3.76853724912717  |

## [1-C<sub>4</sub>H<sub>8</sub>S<sup>C3-pos</sup>]

|    |                   |                    |                   |
|----|-------------------|--------------------|-------------------|
| C  | -5.56449642056790 | 2.22881785237900   | -0.17567535890767 |
| C  | -6.20041008796995 | 1.08058427812473   | -0.60106663543035 |
| C  | -4.28284062098280 | 2.16890392207462   | 0.36337069877579  |
| F  | -6.18039126439609 | 3.40951194222504   | -0.28101720880919 |
| C  | -5.55594171256658 | -0.14637770810624  | -0.48790140252908 |
| F  | -7.43033706958966 | 1.14910213612026   | -1.11661321548412 |
| C  | -4.28848768908308 | -0.2106988090927   | 0.05387391242842  |
| C  | -3.63592292510993 | 0.95365767426229   | 0.49346091076917  |
| N  | -2.36908425912367 | 0.64733156437873   | 0.96325404873054  |
| F  | -3.71224362890627 | 3.32138778610618   | 0.74162537432122  |
| F  | -6.17477100591545 | -1.25605381875472  | -0.90057710484255 |
| O  | -3.58685763464079 | -1.32353522414355  | 0.18777323661617  |
| C  | -1.60918893128251 | 1.59409624430822   | 1.65466103480282  |
| C  | -2.02549524122288 | 2.09791479312345   | 2.88325691445648  |
| C  | -1.25028196477624 | 2.98032077818874   | 3.61307727781762  |
| F  | -3.19532855872568 | 1.71925732131596   | 3.38258635724913  |
| C  | -0.01503415355006 | 3.36906944137499   | 3.12522032693539  |
| F  | -1.67711738885435 | 3.44601984443311   | 4.78370809193365  |
| C  | 0.42315016933160  | 2.88840132289625   | 1.90328744787079  |
| F  | 0.74740784642641  | 4.20218232241092   | 3.82623216500535  |
| C  | -0.37382165736553 | 2.02056828919047   | 1.17781033192431  |
| F  | 1.60502719913845  | 3.27290103433525   | 1.43192285855688  |
| F  | 0.07213838135432  | 1.59017044869570   | 0.00731878598337  |
| Si | -2.04526430517043 | -1.13798881808640  | 1.03045536815884  |
| O  | -0.39646587230608 | -0.807707677027627 | 1.57363097045599  |
| N  | -1.28731406039205 | -2.25348535735035  | -0.17574614278464 |
| C  | 0.53868505281312  | -1.55421043571962  | 1.01125283189302  |
| C  | 0.07337460761592  | -2.42573422246065  | 0.01017440306665  |
| C  | -2.00374180887485 | -2.99834289672772  | -1.11595634880416 |
| C  | 1.88122635211741  | -1.50182537982816  | 1.32673901959016  |
| F  | 2.33279965777876  | -0.65483882754841  | 2.25560645949329  |
| C  | 2.78046610098707  | -2.33726817035666  | 0.67306098137562  |
| C  | 0.97734409744644  | -3.25280100907353  | -0.62996243653651 |
| C  | 2.32731629061422  | -3.21159691396089  | -0.29284658206346 |
| F  | 0.59648218212357  | -4.11404005724253  | -1.58412545188642 |
| F  | 4.07831116304719  | -2.29916320297400  | 0.98534492534522  |
| F  | 3.18774618739269  | -4.02899248157765  | -0.90642540373576 |
| C  | -2.52379938584213 | -2.39407716156742  | -2.25537265658477 |
| C  | -2.30183935922418 | -4.34126362887823  | -0.91562895901654 |
| C  | -3.32449652399735 | -3.08538035663834  | -3.14589075381930 |
| F  | -2.27556320982574 | -1.11498451166957  | -2.49689428050075 |
| C  | -3.60660652453499 | -4.42133644703288  | -2.91973757532300 |
| C  | -3.08556419496665 | -5.05434634320329  | -1.80497384491899 |
| F  | -3.82503834222336 | -2.47596777066431  | -2.1159056173708  |
| F  | -4.37439962315894 | -5.09488431419434  | -3.76933834588606 |
| F  | -1.84018510408548 | -4.96347244467648  | 0.16053194903028  |
| F  | -3.35464565979728 | -6.33888774123049  | -1.58922782539090 |
| C  | -2.60138618267721 | -1.96108865585421  | 2.61703843103917  |
| C  | -1.81500035938216 | -2.12423901360222  | 3.79817915271581  |
| C  | -3.84570221687735 | -2.50976515722347  | 2.79102286671999  |
| S  | -4.05296949797671 | -3.19843284666380  | 4.33838624317997  |
| C  | -2.46723592899152 | -2.76753193849568  | 4.80563734172675  |
| H  | -4.64846998579009 | -2.54471798712151  | 2.071584603784233 |

## [TS-e-FLP<sup>C2-pos</sup>]

|    |                     |                    |                   |
|----|---------------------|--------------------|-------------------|
| C  | -5.61278912735468   | 3.05771242677968   | -0.50227717442957 |
| C  | -6.44029206092665   | 1.95889016228254   | -0.65313158830802 |
| C  | -4.41695062089580   | 2.95057461096244   | 0.20063876813657  |
| F  | -5.96439686442597   | 4.242552580481608  | -1.02452580481608 |
| C  | -6.08079187548566   | 0.73890943186656   | -0.09189607267667 |
| F  | -7.57515162713162   | 2.06729142314534   | -1.33613576139376 |
| C  | -4.89225806109601   | 0.63568696061345   | 0.59664980711483  |
| C  | -4.04415307757365   | 1.73566253183464   | 0.74370275302803  |
| N  | -2.93876459521881   | 1.39492013031291   | 1.51484051541579  |
| F  | -3.66002164539311   | 4.04146262679440   | 0.33787497249311  |
| F  | -6.88007172495264   | -0.31736212815878  | -0.22600232607194 |
| O  | -4.45963867573993   | -0.47742541996220  | 1.19818453218704  |
| C  | -1.77577603353021   | 2.18872322693991   | 1.48437361030824  |
| C  | -1.39535542190335   | 2.97389368197253   | 2.56358622591739  |
| C  | -0.20853618427002   | 3.68416290811177   | 2.56614087165562  |
| F  | -2.16930948566426   | 3.0373200964011    | 3.63876319115224  |
| C  | 0.62692394591241    | 3.62764514877578   | 1.46287129959229  |
| C  | 0.13295204528786    | 4.41610604780288   | 3.61692991521178  |
| C  | 0.26539043483657    | 2.86598330614984   | 0.36449314847057  |
| F  | 1.76564711418557    | 4.30033861071206   | 1.45734699671984  |
| C  | -0.92320021519639   | 2.15670403681105   | 0.38567804518576  |
| F  | 1.06118260031182    | 2.81368686267796   | -0.69236047546183 |
| F  | -1.24157882238594   | 1.41900065088851   | -0.66778966600971 |
| Si | -2.90894531252161   | -0.32986465407867  | 1.98596098153393  |
| O  | -1.46667619875705   | -0.03983906357241  | 2.92578088204465  |
| N  | -1.98636574064261   | -1.45376617482782  | 0.95644360624240  |
| C  | -0.41895774674122   | -0.74845208975670  | 2.49892635635135  |
| C  | -0.66058806945452   | -1.55545256590460  | 1.37600970362108  |
| C  | -2.54058617159283   | -2.35763126204207  | 0.04363453582003  |
| C  | 0.83843075058142    | -0.68469251879423  | 3.06569116361680  |
| F  | 1.06029449964078    | 0.07527373676946   | 4.13711016745760  |
| C  | 1.88551025336890    | -1.40524706866781  | 1.50415511578444  |
| C  | 0.39407097156653    | -2.25339037081624  | 0.81483616678655  |
| C  | 1.66198573475602    | -2.18106895735107  | 1.38162447064899  |
| F  | 0.23560111103714    | -2.99566227146178  | -0.28285221818080 |
| F  | 3.09973028731486    | -1.33999567679862  | 3.03925595020603  |
| F  | 2.66629073696708    | -2.85606296569976  | 0.83284004267226  |
| C  | -1.34446233275149   | -1.92319437475809  | -1.1327222553212  |
| C  | -2.54806285104421   | -3.72924952397277  | 0.28526108522634  |
| C  | -3.73934919209893   | -2.80761549257995  | -0.21649747741101 |
| F  | -3.15178421243768   | -0.63578287514874  | -1.43661303255064 |
| C  | -3.72315841970877   | -4.16674089166542  | -1.75122351385464 |
| C  | -3.12198695038636   | -4.62900126484330  | -0.59303255710221 |
| F  | -4.30747584813380   | -2.36031391982010  | -3.12516196545504 |
| F  | -4.27298097077205   | -5.01934474890495  | -2.60044650550987 |
| F  | -1.98885821141022   | -4.20333309954739  | 1.39386144620464  |
| F  | -3.11108590766960   | -5.9278819457127   | -0.3224834228693  |
| C  | -3.67920783610158   | -1.39958876946651  | 3.49637481184248  |
| N  | -5.33570984617635   | 0.05345459413696   | 5.24339407923033  |
| C  | -6.17853834531283   | 1.13385938861427   | 4.59221884541041  |
| C  | -4.53425990451432   | 0.50551210106633   | 6.45003552696614  |
| C  | -5.41710007189526   | 1.293919527943208  | 7.402720317346607 |
| C  | -3.420561152352850  | 1.32931561113105   | 6.4712263720263   |
| C  | -3.99256460195010   | -0.69797878133743  | 7.22698950391266  |
| C  | -6.22055712561591   | 2.40692630171578   | 6.78565221690477  |
| H  | -4.76942679492642   | 1.68467138300954   | 8.21614816212561  |
| H  | -6.10596092541351   | 0.59748199057580   | 7.91671210795574  |
| C  | -7.03836507038236   | 1.85064358925346   | 5.63653283448636  |
| C  | -0.9959443235782    | 0.51412095132033   | 3.54136288586867  |
| C  | -5.30151374440699   | 2.14557116253019   | 3.85852838918905  |
| H  | -7.78907933386887   | 1.15575096583547   | 6.02785899963278  |
| H  | -7.59118432178536   | 2.64503601638683   | 5.12881422212982  |
| H  | -5.56163062468907   | 3.20598159153783   | 6.43752970685704  |
| H  | -6.87873951289810   | 2.86308098098662   | 7.52837285815471  |
| C  | -6.13687614430697   | -1.12787585917383  | 5.56436002304842  |
| H  | -6.67229126950958   | -1.46482286018216  | 4.68481928063529  |
| H  | -6.86357979046911   | -0.94856290060509  | 6.36219094256119  |
| H  | -5.48364253191323   | -1.94036585927126  | 5.86764713584989  |
| H  | -4.77792161122645   | -7.127618950352499 | 7.71145942513088  |
| H  | -3.34102761706497   | -0.31970326255996  | 8.01453621536553  |
| H  | -3.40120025148577   | -1.3664312534172   | 6.60445254248124  |
| H  | -3.56041634043148   | 2.35769429617783   | 5.77280574372331  |
| H  | -2.81415531412407   | 0.89196145175832   | 5.15809256228504  |
| H  | -2.60542743868712   | 1.35830136446065   | 6.84053044757750  |
| H  | -5.91167142656085   | 2.68392668621195   | 3.13636040865979  |
| H  | -4.49565254059553   | 1.66301678189595   | 3.31428929140886  |
| H  | -4.85328475726094   | 2.88871828529341   | 4.50884597537417  |
| H  | -0.9763730372051484 | -0.073973038757579 | 3.97632281148694  |

# SUPPORTING INFORMATION

|   |                   |                   |                  |
|---|-------------------|-------------------|------------------|
| H | -6.55213848350666 | -0.10503545779046 | 2.82884464982545 |
| H | -7.56386615856238 | 1.32326208866092  | 2.97931256524521 |
| H | -4.37228087366538 | -0.57926630192340 | 4.18425806785575 |
| S | -4.78608172567910 | -2.62333036103909 | 2.87310518449322 |
| C | -2.7555702546860  | -2.08407685301386 | 4.32772497383124 |
| C | -2.96056820257221 | -3.44698775483797 | 4.45616046163192 |
| C | -4.04695843183570 | -3.87061961050307 | 3.71101809581545 |
| H | -1.94433856651468 | -1.55161463279697 | 4.80466960527527 |
| H | -2.33868900207838 | -4.11164591365728 | 5.03889474506505 |
| H | -4.40529050191786 | -4.88567420923704 | 3.61379535764543 |

|   |                    |                   |                  |
|---|--------------------|-------------------|------------------|
| H | -6.86173418293417  | 2.79214025646044  | 7.57941218120858 |
| C | -6.08254154047916  | -1.13807013185072 | 5.47346422159671 |
| H | -6.53923187966264  | -1.47696298380940 | 4.54946192482119 |
| H | -6.87854472345178  | -0.98233532226899 | 6.20783883618129 |
| H | -5.44206744779842  | -1.94151458722677 | 5.82216529407961 |
| H | -4.75565495837297  | -1.34090209251879 | 7.67299501470639 |
| H | -3.31221367800656  | -0.40081353860611 | 7.99620016832770 |
| H | -3.38215820736293  | -1.41026105019739 | 6.55874323864804 |
| H | -3.52768520349998  | 2.31526830394853  | 5.76023487017482 |
| H | -2.72813798273378  | 0.83794301807276  | 5.24910479946775 |
| H | -2.61842452568483  | 1.37593607433999  | 6.92151177932366 |
| H | -5.83545079995801  | 2.71818169269005  | 3.15049334793135 |
| H | -4.39526543564298  | 1.74488138903760  | 3.39917111051733 |
| H | -4.854534234374709 | 2.95482347468552  | 4.57645577969219 |
| H | -7.83937640630190  | -0.04254959188005 | 3.93720842850249 |
| H | -6.48066233217124  | -0.02081105845797 | 2.79286482279098 |
| H | -7.50646521802240  | 1.39047047089990  | 2.98566805851738 |
| H | -4.30775807628692  | -0.56540573490686 | 4.13590880259282 |

## [TS-e-FLP<sup>C3-pos.</sup>]<sup>+</sup>

|    |                   |                   |                   |
|----|-------------------|-------------------|-------------------|
| C  | -5.58388800482640 | 3.11773948124423  | -0.44978931624252 |
| C  | -6.42699323396915 | 2.03296339854875  | -0.61623583481037 |
| C  | -4.38916850109347 | 2.98278714676754  | 0.24961551493047  |
| F  | -5.91987956736804 | 4.30091547628860  | -0.95379945598570 |
| C  | -6.08329130881951 | 0.79991087783651  | -0.07496689866733 |
| F  | -7.56198210741878 | 2.16893311410121  | -1.29317866093608 |
| C  | -4.89516900199904 | 0.66847942885595  | 0.60874344155062  |
| C  | -4.03092863610139 | 1.75305269902348  | 0.76929321419344  |
| N  | -2.93026329348544 | 1.38442388618750  | 1.53361528119141  |
| F  | -3.62012325251777 | 4.06188718282283  | 0.40890243984466  |
| F  | -6.89813724604048 | -0.24407300507125 | -0.22034491393878 |
| O  | -4.48597949203637 | -0.45873054921328 | 1.20119119071088  |
| C  | -1.75079102774509 | 2.15387388256393  | 1.49823321919804  |
| C  | -1.34514813605480 | 2.92800249827767  | 2.57626863977409  |
| C  | -0.14508760813898 | 3.61560059079455  | 2.56886434171970  |
| F  | -2.10725084039814 | 3.00547309682907  | 3.65898591014028  |
| C  | 0.67962712462394  | 3.54494976579999  | 1.45816413951309  |
| F  | 0.21723931595818  | 4.34102285380876  | 3.61683413817703  |
| C  | 0.29346237430263  | 2.79322859928847  | 0.36100627876612  |
| F  | 1.83147159226988  | 4.19437583217506  | 1.44471119202228  |
| C  | -0.90866341715967 | 2.10758252579092  | 0.39171839816682  |
| F  | 1.07824631869301  | 2.72762619277215  | -0.70323963485132 |
| F  | -1.24961693778270 | 1.37577466497832  | -0.65948893832132 |
| Si | -2.92738024569066 | -0.34916737161936 | 1.97505799194627  |
| O  | -1.47381705279649 | -0.10249501159087 | 2.91086839607765  |
| N  | -2.02565339859687 | -1.45299295770075 | 0.90897818416178  |
| C  | -0.41123040440053 | -0.72253110499601 | 2.38943793855023  |
| C  | -0.67569778714824 | -1.50424968899709 | 1.25587294873779  |
| C  | -2.58861618713721 | -2.39441251641957 | 0.04182178759828  |
| C  | 0.87422132718622  | -0.60029765934765 | 2.87727051532235  |
| F  | 1.12447334703909  | 0.14693788815270  | 3.95139964309509  |
| C  | 1.91997268620123  | -1.25450647320859 | 2.23600118076565  |
| C  | 0.37403165934312  | -2.13853917812883 | 0.61720491978413  |
| C  | 1.66802109949834  | -2.02059384023941 | 1.11252118874591  |
| F  | 0.18177541710325  | -2.86672307832823 | -0.48459762315839 |
| F  | 3.15919217703954  | -1.13712646162569 | 2.70021438744074  |
| F  | 2.66613834836587  | -2.64322751562503 | 0.49444271032127  |
| C  | -3.25562732430501 | -2.01497481588924 | -1.11975726595160 |
| C  | -2.51840811545354 | -3.75877844329892 | 0.31303747105092  |
| C  | -3.84318273365668 | -2.94797784662856 | -1.95816909690221 |
| F  | -3.32460939574763 | -0.73770268729274 | -1.45673680164346 |
| C  | -3.75649951936468 | -4.29779005010888 | -1.65944912461760 |
| C  | -3.08546537174598 | -4.70538509323017 | -0.51888787488107 |
| F  | -4.46966100550534 | -2.55807913663954 | -3.05751121673589 |
| F  | -4.30555245179512 | -5.19523393229456 | -2.46139081563557 |
| F  | -1.88027239484555 | -4.17547742249950 | 1.40213855527446  |
| F  | -2.99873351785198 | -5.9561943147954  | -0.22549360832996 |
| C  | -3.68714782240772 | -1.45639688285050 | 3.49466439686220  |
| C  | -2.70299468944225 | -2.14039205651212 | 4.31745102254453  |
| C  | -4.59851890626501 | -2.41915554913510 | 3.01731798794848  |
| S  | -4.26644789420567 | -3.98080347545238 | 3.52235842044116  |
| C  | -2.88988890364310 | -3.47235686581674 | 4.42001873032246  |
| H  | -5.42946258718093 | -2.23113791273987 | 2.35551067493021  |
| H  | -1.87786488359539 | -1.62225094242787 | 4.78298785181922  |
| H  | -2.28872905115195 | -4.19691722423901 | 4.94697349349521  |
| N  | -5.28626588692999 | 0.05885828922229  | 5.22389721789364  |
| C  | -6.12367948967150 | 1.15816955532078  | 4.59740852195203  |
| C  | -4.50388091994017 | 0.04952749295122  | 6.45605698066143  |
| C  | -5.40101452486263 | 1.22412826033190  | 7.44606889370290  |
| C  | -3.28566494308828 | 1.30323280618359  | 6.06234177936360  |
| C  | -3.96764028985653 | -0.75535885237691 | 7.20082716729849  |
| C  | -6.19367803932554 | 2.35937156367937  | 6.83154432960546  |
| H  | -4.76713279879005 | 1.58563442767298  | 8.25986778365094  |
| H  | -6.09823317845969 | 0.51054485725008  | 7.89841565578854  |
| C  | -6.99626746535688 | 1.84145230915345  | 5.65437206026802  |
| C  | -7.03729743739901 | 0.56746374701995  | 3.52337830339775  |
| C  | -5.24407668263165 | 2.19745982052793  | 3.9033588953281   |
| H  | -7.75187620376521 | 1.1348098932196   | 6.01404962763672  |
| H  | -7.54215996556555 | 2.65204346569894  | 5.16501011254044  |
| H  | -5.52803986297435 | 3.16742366658938  | 6.51893184189766  |

## phenylacetylene / PhCCCH

|   |                   |                   |                   |
|---|-------------------|-------------------|-------------------|
| C | -5.01543329686789 | 1.98679113905021  | 0.00001738870749  |
| C | -5.05864524750413 | 0.60376272523617  | 0.00008570767385  |
| C | -3.79541231196844 | 2.64820227414197  | -0.00009680769468 |
| H | -5.93951443221028 | 2.55165355109034  | 0.00005439948108  |
| C | -2.61460241561303 | 1.91900737462923  | -0.00014263649179 |
| C | -2.64918984099903 | 0.53575917641768  | -0.00007426560082 |
| C | -3.7839943515256  | -0.13711266326394 | 0.00003479520204  |
| H | -6.00683310891640 | 0.08177157763496  | 0.00017574188174  |
| C | -3.91265112299722 | -1.55961363118764 | 0.00007894113145  |
| H | -1.73188154042097 | -0.0387169467969  | -0.00010894524382 |
| H | -3.76485725989803 | 3.73077969341138  | -0.00015046004155 |
| H | -1.66031377440323 | 2.43119639270427  | -0.00023162588998 |
| C | -3.94101848036077 | -2.76176162642952 | -0.00009789844485 |
| H | -3.96930773268797 | -3.82481898875542 | -0.00020238327017 |

## [2d] / [1-CCPh]<sup>+</sup>

|    |                   |                   |                   |
|----|-------------------|-------------------|-------------------|
| C  | -5.17649485435484 | 2.67409651134590  | -0.98009370054807 |
| C  | -5.90501461591574 | 1.50329444281205  | -1.03052039055900 |
| C  | -3.89918035170225 | 2.68223242402434  | -0.45089326987979 |
| F  | -5.70704804857783 | 3.80995851659117  | -1.44188701671439 |
| C  | -5.35243484564128 | 0.32172247493949  | -0.54841707075131 |
| F  | -7.13930491304114 | 1.50544017269831  | -1.53984052827563 |
| C  | -4.07774861022982 | 0.32591798871063  | -0.01986918312163 |
| C  | -3.32990249202567 | 1.51488886051999  | 0.03336909364204  |
| N  | -2.07475601547171 | 1.26284785210433  | 0.56429172006473  |
| F  | -3.22610479565172 | 3.84801002399698  | -0.43715841035811 |
| F  | -6.06258872902902 | -0.80650781691390 | -0.60849732868848 |
| O  | -3.44963423636428 | -0.74204011460752 | 0.44071788349744  |
| C  | -1.14392296217499 | 2.29110849466946  | 0.74770453327206  |
| C  | -1.24386813178552 | 3.17548698552536  | 1.81499032640577  |
| C  | -0.29753767621389 | 4.15970746557813  | 2.03712895254046  |
| F  | -2.26762960104597 | 3.08040062815734  | 2.65231237604558  |
| C  | 0.78557229400757  | 4.27248130493197  | 1.18328766120641  |
| F  | -0.41701179842503 | 4.9915378221980   | 3.06758745086154  |
| C  | 0.91239497417582  | 3.40279924644042  | 0.11411384343551  |
| F  | 1.69915523286033  | 5.21531310275170  | 1.38574133760184  |
| C  | -0.04988368347656 | 2.43190878670759  | -0.09786462212064 |
| F  | 1.95625864157158  | 3.50964713860603  | -0.70110641628271 |
| F  | 0.09577708771075  | 1.61669921429681  | -1.13224971282086 |
| Si | -1.84483724630448 | -0.44028329448888 | 1.09845724968469  |
| O  | -0.16661630757058 | -0.07745362158494 | 1.47657872214443  |
| N  | -1.21752294169809 | -1.90379734508561 | 0.24600715917101  |
| C  | 0.70182030615726  | -1.00746722284866 | 1.11533092320368  |
| C  | 0.14594996718058  | -2.08975289560273 | 0.41043304461052  |
| C  | -0.23803088350894 | -2.89371691028305 | -0.30264483910167 |
| C  | 2.05953470880772  | -0.94973682200387 | 1.35716493694337  |
| F  | 2.59361592419717  | 0.08331722797471  | 2.01200360541814  |
| C  | 2.88680454007724  | -1.97366602563569 | 0.90881624563444  |
| C  | 0.98093941914275  | -3.0952083679334  | -0.03908014693533 |
| C  | 3.34830985264335  | -3.03730885685787 | 0.21432474872199  |
| F  | 0.51713632639198  | -4.14459706968241 | -0.73241216958517 |
| F  | 4.19939662480302  | -1.92885994439541 | 1.15088004497777  |
| F  | 3.14348162085461  | -4.01766739068804 | -0.22307695388263 |
| C  | -2.69451950652215 | -2.68970788245932 | -1.51130641748306 |
| C  | -2.31182445384351 | -4.07646286502600 | -0.37598557905088 |
| C  | -3.60910160048766 | -3.60182450009773 | -2.00588754061219 |
| F  | -2.46553820285163 | -1.58866506216124 | -2.21171441257337 |
| C  | -3.86637984586410 | -4.76764558756149 | -1.30604792171450 |
| C  | -3.21030047942923 | -5.00834328244741 | -0.1116858912368  |
| F  | -4.24478543208104 | -3.36523911265233 | -3.14795971099957 |
| F  | -4.73718480902557 | -5.65235866353722 | -1.78060618126414 |
| F  | -1.71376235730147 | -4.32238691541171 | 1.53475672432368  |



# SUPPORTING INFORMATION

|                       |                   |                    |                   |                                                          |                    |                    |                   |
|-----------------------|-------------------|--------------------|-------------------|----------------------------------------------------------|--------------------|--------------------|-------------------|
| F                     | -3.46361822415373 | -6.12228189646875  | 0.56976662688818  | Cl                                                       | -4.66217134592279  | -0.79234778103269  | 1.89252588522590  |
| C                     | -2.33742706561154 | -0.80321615047277  | 2.83353382156816  | Si                                                       | -2.73035573053119  | -0.22206509139025  | 1.72428270720162  |
| C                     | -2.67496260003157 | -1.12694844022780  | 3.95140201013934  | Cl                                                       | -1.83375420407756  | -0.36362934793733  | 3.53044156161610  |
| C                     | -3.08094285007488 | -1.53004182016518  | 5.25006276402592  | Cl                                                       | -1.78438270058498  | -1.42445208389983  | 0.40345772404452  |
| C                     | -3.07672356683667 | -2.88455722202796  | 5.60088969433899  | pmp-SiCl <sub>4</sub>                                    |                    |                    |                   |
| C                     | -3.49965319675823 | -0.58974776455729  | 6.19694828226245  | Cl                                                       | -2.84850792389258  | 2.22663970169080   | 0.74606534594905  |
| C                     | -3.48184820378484 | -3.28252028619302  | 6.86257123538078  | Cl                                                       | -3.38349437212566  | -0.58015861360542  | 0.04516602768404  |
| C                     | -3.90458049280275 | -0.99660860873279  | 7.45624749923032  | Si                                                       | -2.35444495240706  | 0.33894095367581   | 1.64944790378620  |
| H                     | -2.75457005157034 | -3.61298136349464  | 4.86764762410236  | Cl                                                       | -3.07110597241107  | 1.05525223485330   | 3.48583530253605  |
| C                     | -3.89816181827947 | -2.34256180173095  | 7.79551493361363  | Cl                                                       | -2.20130077230974  | -1.63902264565726  | 2.52628606064658  |
| H                     | -3.47330199110187 | -4.33530063264975  | 7.11908445364825  | N                                                        | -0.19623678328713  | 0.56553612259658   | 1.49851382288983  |
| H                     | -4.22847812321365 | -0.26564314333057  | 8.17855262979261  | C                                                        | 0.43007612125446   | 1.87860121039441   | 2.15556001715605  |
| H                     | -4.21618587999026 | -2.65752509653306  | 8.78213174205519  | C                                                        | 0.26008110525817   | 0.32555490013770   | 0.00906575362612  |
| H                     | -3.50359381952189 | 0.45855690479542   | 5.92695662548840  | C                                                        | 0.40952026228932   | -0.53937837340997  | 2.29378876582819  |
| 1—PhCClH              |                   |                    |                   |                                                          |                    |                    |                   |
| C                     | -5.47059739217711 | 2.51480933647359   | -1.59564181776061 | H                                                        | 0.17439629715293   | -1.49491325088041  | 1.85516910467839  |
| C                     | -5.91742665871123 | 1.30023533440069   | -2.09040396882171 | H                                                        | 0.00816539260075   | -0.53737361128312  | 3.29719568272686  |
| C                     | -4.45869990106582 | 2.56665467881851   | -0.64523522455233 | H                                                        | 1.48721499637040   | -0.41695916606007  | 2.33177736505728  |
| F                     | -6.01692365090702 | 3.64279294828968   | -2.03052225666638 | C                                                        | 1.93002221039634   | 1.97154842682247   | 1.82621439847834  |
| C                     | -5.35719770397481 | 0.11653166197983   | -1.63103506319426 | C                                                        | 0.31922315297038   | 1.80787854602910   | 3.67955029112099  |
| F                     | -6.88033277291693 | 1.26956657309970   | -3.00224033092865 | C                                                        | -0.1259939234084   | 3.20385114727375   | 1.75619302643347  |
| C                     | -4.33928033475474 | 0.16980574558969   | -0.69872452643900 | C                                                        | 1.77228020197407   | 0.53169983175811   | -0.13160002043887 |
| C                     | -3.87310867912980 | 1.39335354287125   | -0.20078919189411 | C                                                        | 0.31222921529703   | 1.80787854602910   | 3.67955029112099  |
| N                     | -2.84775290644365 | 1.18180876235145   | 0.71406234693332  | C                                                        | -0.4465088323169   | -1.22687134721870  | -0.99839513337703 |
| F                     | -4.07596004658719 | 3.76138222718342   | -0.19354877601086 | C                                                        | -0.20467969384546  | -1.12029697983192  | -0.40749172577332 |
| F                     | -5.78724750327560 | -1.04807293241079  | -2.10261844854634 | C                                                        | 2.25441210974769   | 1.87604525029893   | 0.35547567056069  |
| O                     | -3.7005263250230  | -0.89615403159723  | -0.21850146958024 | H                                                        | 1.99988409112681   | 0.38252489775355   | -1.18915247200572 |
| C                     | -2.15994942530845 | 2.26250755182670   | 1.29207055016904  | H                                                        | 2.30852271443886   | -0.25726856375781  | 0.40245366878879  |
| C                     | -2.29562635942787 | 2.57441596899442   | 2.63838869214119  | H                                                        | 1.78593700646336   | 2.68896238213427   | -0.20452083732509 |
| C                     | -1.60338883617053 | 3.62490126291312   | 3.21250581841712  | H                                                        | 3.33138985737979   | 1.97103466329701   | 0.20176856079767  |
| F                     | -3.10239563109343 | 1.85299240099937   | 3.40960988606139  | H                                                        | 2.20363894858575   | 2.49089658253732   | 2.36416057677403  |
| C                     | -0.76817807551227 | 4.40613265081128   | 2.43065818742934  | H                                                        | 2.26581499136035   | 2.92222841207969   | 2.24371143562353  |
| F                     | -1.74444294037357 | 3.89278034491897   | 4.50313827675857  | H                                                        | 1.01294919351826   | 1.09903784636208   | 4.12705843835457  |
| C                     | -0.62090625570647 | 4.12171574877088   | 1.08253030751633  | H                                                        | -0.070598095328    | 1.58492588445742   | 4.01359509637929  |
| F                     | -0.11581283805085 | 5.4211028240609508 | 2.97094184410171  | H                                                        | 0.57752069507326   | 2.79530196918213   | 4.06339983100782  |
| C                     | -1.30542560986071 | 3.05227478646639   | 0.53210727325658  | H                                                        | 0.72686943932678   | -1.81631509286675  | -0.03770443623540 |
| F                     | 0.17242640736355  | 4.86928872189990   | 0.33125036944290  | H                                                        | 0.01018240760099   | -1.15887613303797  | -1.49652094300388 |
| F                     | -1.14773775894139 | 2.78634860083513   | -0.75610973791847 | H                                                        | -1.00893680025083  | -1.47214071879486  | -0.10910166301163 |
| Si                    | -2.55273309015107 | -0.53989028376890  | 1.02230128033137  | H                                                        | -0.37380411379986  | 2.28454743964567   | -0.7766306214883  |
| O                     | -1.32036041928598 | -0.16410866188848  | 2.16603686579574  | H                                                        | -1.78674815641379  | 0.97694871676529   | -1.10970207126390 |
| N                     | -1.57617294945045 | -1.93913381937830  | 0.529709270443320 | H                                                        | 0.03642834953743   | 1.05704072387471   | -1.96188598872990 |
| C                     | -0.35445891325495 | -1.08164626593242  | 2.26348300359908  | H                                                        | -0.31383972616655  | 3.36124583631591   | 0.68948055925481  |
| C                     | -0.45568728846011 | -2.12225907412729  | 1.33418840476815  | H                                                        | 0.44072038486260   | 3.98691129744239   | 2.14425547914077  |
| C                     | -1.96294623597553 | -2.89896688682433  | -0.42091416602446 | H                                                        | -1.18861128264067  | 3.33400551217687   | 2.20934316803405  |
| C                     | 0.66038058846641  | -1.05510936086103  | 3.19594282588838  | [TS-N-methylpyrrole-pmp-SiCl <sub>4</sub> ] <sup>‡</sup> |                    |                    |                   |
| F                     | 0.74730338552311  | -0.06933235469456  | 4.08599375854174  | Cl                                                       | -1.88845012185426  | 1.61839351969833   | 2.66776827582426  |
| C                     | 1.59826761379029  | -2.08006965962562  | 3.21145019246046  | Cl                                                       | -3.80315550540202  | -0.04582123809980  | 1.09093374712662  |
| C                     | 0.50355859437806  | -3.11807949343461  | 1.33262640989310  | Si                                                       | -2.26416338937451  | -0.64875645484533  | 2.68064840495842  |
| C                     | 1.52370198250417  | -3.09835033674029  | 2.27881867117877  | Cl                                                       | -0.85088424144279  | -0.59901974805661  | 4.37814404043176  |
| F                     | 0.48081759244407  | -4.11273970446839  | 0.44450395414024  | Cl                                                       | -1.10784999305963  | -1.62649397434411  | 1.43077186020865  |
| F                     | 2.56281734158395  | -2.08130582073469  | 4.12586423765426  | C                                                        | -3.55803322462395  | -1.55390152289939  | 3.65244708292483  |
| F                     | 2.43548233375695  | -4.06483510472499  | 2.28356096445566  | C                                                        | -3.05916620397407  | -2.59343014265302  | 4.55688182034485  |
| C                     | -1.91764187109203 | -2.62354278799929  | -1.78182596010694 | C                                                        | -4.49108658572742  | -2.27220722109955  | 2.84827101885641  |
| C                     | -2.46774116592107 | -4.13323530791234  | -0.03474586513403 | N                                                        | -4.55238344522556  | -3.54004926232842  | 3.22081639961355  |
| C                     | -2.37061520058274 | -3.53566725913085  | -2.71970275815953 | C                                                        | -5.37083350189082  | -4.56010829560500  | 2.60952967691567  |
| F                     | -1.45626894808161 | -1.45584991599355  | -2.20306277906440 | C                                                        | -4.74027266153509  | -5.35754938714624  | 2.21604674379942  |
| C                     | -2.86893918892702 | -4.76062495290987  | -2.30505110120010 | H                                                        | -5.93581635155267  | -4.11898058638200  | 1.79198166244475  |
| C                     | -2.91157964423067 | -5.06469767726092  | -0.95422054129214 | H                                                        | -6.06232135429537  | -4.97948073268183  | 3.34111054310568  |
| F                     | -2.33159143470770 | -3.24406644631812  | -4.01005727430600 | C                                                        | -3.67620369534333  | -3.75909119124462  | 4.27745688505198  |
| F                     | -3.30534999598766 | -5.63638030154525  | -3.19434111713887 | H                                                        | -5.06108519518723  | -1.914301192782036 | 2.00849063189689  |
| F                     | -2.53682295541352 | -4.43596105432826  | 1.26042892227231  | H                                                        | -2.29202479900188  | -2.45231507890903  | 5.29584615672814  |
| F                     | -3.38457959887479 | -6.23443171176258  | -0.54928514814456 | H                                                        | -3.57345178202630  | -4.74187789678209  | 4.70803248115590  |
| C                     | -4.02842373971369 | -1.04414377278640  | 2.4005563746153   | N                                                        | -5.15064183352479  | 0.04483955312651   | 5.29299163240156  |
| C                     | -3.44269214033008 | -1.53476887994829  | 3.37465201630771  | C                                                        | -6.11546827986731  | 0.97668143866715   | 4.57101298739310  |
| C                     | -2.59539521719973 | -2.00591250567745  | 4.37498155446043  | C                                                        | -4.43897547991183  | 0.67592261073488   | 6.48098031920607  |
| C                     | -2.18706087277235 | -3.35050517476781  | 4.38183963327109  | C                                                        | -5.46624045883328  | 1.29910879282187   | 7.43167822621865  |
| C                     | -2.10303561937824 | -1.10660001966122  | 5.33621714387531  | C                                                        | -3.40776077174392  | 1.71320190097223   | 6.04094501800922  |
| C                     | -1.28537245909220 | -3.77831308628385  | 5.33190374264372  | C                                                        | -3.64323926011737  | -0.37479961942802  | 7.25500082533490  |
| C                     | -1.20452953198775 | -1.55287494173986  | 6.28145558985403  | C                                                        | -6.40803869280408  | 2.27140458617893   | 6.74715884708297  |
| H                     | -2.56804241961972 | -4.02359101448693  | 3.62674785236303  | H                                                        | -4.91801688117567  | 1.79392422962367   | 8.23726417669323  |
| C                     | -0.79430468380876 | -2.887121014734498 | 6.27530586313165  | H                                                        | -6.04909892056428  | 0.50098817532135   | 7.90375122565427  |
| H                     | -0.95189887081734 | -4.801771493844685 | 5.336121145811267 | C                                                        | -7.09431385207581  | 1.59934106952620   | 5.57294203538531  |
| H                     | -0.80434596515771 | -0.86417680403798  | 7.01356534207366  | C                                                        | -6.92291711858431  | 0.20275565494647   | 3.52795931248786  |
| H                     | -0.07554068504416 | -3.22082911368028  | 7.01093544253808  | C                                                        | -5.38496826803751  | 2.07113560399711   | 3.79190719601854  |
| H                     | -2.41073680734777 | -0.07031566864493  | 5.29638832868376  | H                                                        | -7.770703887929304 | 0.82696497383014   | 5.94256889039761  |
| H                     | -5.01903361952834 | -0.82769495081825  | 2.04048769011297  | H                                                        | -7.71475366930153  | 2.31448862253260   | 5.02673984724147  |
| SiCl <sub>4</sub>     |                   |                    |                   |                                                          |                    |                    |                   |
| Cl                    | -2.63812601888348 | 1.69034430426010   | 1.07410212191185  | H                                                        | -5.85939593391351  | 3.15392570029623   | 6.40997805517624  |
| pmp-SiCl <sub>4</sub> |                   |                    |                   |                                                          |                    |                    |                   |
| Cl                    | -2.84850792389258 | 2.22663970169080   | 0.74606534594905  | H                                                        | -7.15473524788850  | 2.63214779881685   | 7.45826082328984  |
| Si                    | -2.35444495240706 | 0.33894095367581   | 1.64944790378620  | C                                                        | -5.83071821393917  | -1.19126047324564  | 5.68393694123246  |
| Cl                    | -3.07110597241107 | 1.05525223485330   | 3.48583530253605  | H                                                        | -6.17267734518444  | -1.70949560633396  | 4.79274092387524  |
| Cl                    | -2.20130077230974 | -1.63902264565726  | 2.52628606064658  | H                                                        | -6.69016520759132  | -1.02456254672349  | 6.33631682330932  |
| N                     | -0.19623678328713 | 0.56553612259658   | 1.49851382288983  | H                                                        | -5.13299015437026  | -1.85316809038268  | 6.18194544937329  |
| C                     | 0.43007612125446  | 1.87860121039441   | 2.155560017       |                                                          |                    |                    |                   |

# SUPPORTING INFORMATION

|   |                   |                    |                  |
|---|-------------------|--------------------|------------------|
| H | -4.26446849641692 | -1.12344693872474  | 7.74435300834787 |
| H | -3.09239246225623 | 0.14195606297192   | 8.04054402113892 |
| H | -2.90817079570514 | -0.86251635036684  | 6.61680529073353 |
| H | -3.83605590524141 | 2.64393756086457   | 5.68949672564234 |
| H | -2.74929509230884 | 1.32260893496745   | 5.26772505185888 |
| H | -2.78367533063256 | 1.95537406625865   | 6.90179307547206 |
| H | -6.05014349975084 | 2.43854329541421   | 3.01025098580302 |
| H | -4.49136940880861 | 1.69686410783899   | 3.29912988472923 |
| H | -5.11134709211555 | 2.92809693933651   | 4.39837122348802 |
| H | -7.56610926329413 | -0.56646667075712  | 3.95246175243168 |
| H | -6.27138915921260 | -0.229256125416369 | 2.76948481691280 |
| H | -7.57315272563068 | 0.91517924298516   | 3.02045735261769 |
| H | -4.19725324838740 | -0.63458113970435  | 4.33816982329073 |

## Si(cat<sup>2-</sup>)<sub>2</sub>

|    |                    |                   |                   |
|----|--------------------|-------------------|-------------------|
| C  | -10.55076226899912 | 0.78474120843701  | 0.58941316723326  |
| C  | -10.32192076373243 | -0.26402232745372 | -0.30551672408844 |
| C  | -9.49242808187249  | 1.58639506353077  | 1.03828296613970  |
| Cl | -12.13054033257647 | 1.10013381293036  | 1.15412754240195  |
| C  | -8.22701633776459  | 1.30798477723132  | 0.56758562509050  |
| Cl | -9.71821646241455  | 2.86754906165697  | 2.13871197245663  |
| C  | -7.99854764926496  | 0.26259246221636  | -0.31997501836773 |
| O  | -7.09234276804206  | 1.98771513029024  | 0.90899787363372  |
| C  | -9.02815910453218  | -0.53581941315068 | -0.77126876020853 |
| Cl | -11.62218121222198 | -1.23235354609910 | -0.84107427012257 |
| Cl | -8.69533513587660  | -1.80526628150983 | -1.85826082257715 |
| O  | -6.68579369104490  | 0.12561484992972  | -0.66706494856490 |
| Si | -5.82161605332537  | 1.26571628184880  | 0.14932912380924  |
| O  | -4.86374660199015  | 2.23183277927610  | -0.77946702878949 |
| O  | -4.63977633534676  | 0.69057005630793  | 1.14221989392336  |
| C  | -3.57798966416672  | 2.09807883374492  | -0.33768321195948 |
| C  | -3.45309994784435  | 1.23392218651950  | 0.74401401361560  |
| C  | -2.48111383663270  | 2.73320364158393  | -0.87961784494474 |
| C  | -1.22661745915061  | 2.47945986589287  | -0.30804253041050 |
| Cl | -2.68727199839297  | 3.784004021275667 | -2.20481833397723 |
| C  | -1.10210170802665  | 1.61512634164667  | 0.78307771393870  |
| Cl | 0.15510219764143   | 3.24004165746373  | -0.96178651697196 |
| C  | -2.22846407955967  | 0.98102497266969  | 1.32471934766495  |
| Cl | -2.13179287633742  | -0.07557414424355 | 2.65814174664372  |
| Cl | 0.43228216427440   | 1.31872269652327  | 1.47046502443140  |

## pmp-Si(cat<sup>2-</sup>)<sub>2</sub>

|    |                   |                    |                   |
|----|-------------------|--------------------|-------------------|
| C  | -4.51408413527720 | 3.39562732711956   | -0.30494924656535 |
| C  | -5.42867282123843 | 2.52507062486062   | -0.89977548242426 |
| C  | -3.82013840647957 | 3.01851418418844   | 0.85387529411936  |
| C  | -5.66644784457383 | 1.25815035803815   | -0.34654147611134 |
| C  | -4.96505706552679 | 0.89923514245819   | 0.78462869776242  |
| C  | -4.05233854282212 | 1.76341795257706   | 1.37883545103959  |
| O  | -3.51839049424180 | 1.25228403638717   | 2.48528162955952  |
| O  | -5.08561256863212 | -0.24954820585042  | 1.46386739918540  |
| Si | -4.05332981158499 | -0.35547998198333  | 2.82308689574352  |
| O  | -2.43432518159686 | -0.84011678043963  | 3.01587835588699  |
| O  | -4.54293340398876 | -2.02471599648449  | 2.89424072441702  |
| C  | -2.30618607639370 | -1.16049548649638  | 3.23886674581762  |
| C  | -3.52360148239692 | -2.83267174938471  | 3.16875321509739  |
| C  | -1.13542209580671 | -2.82390562273773  | 3.53737135091640  |
| C  | -1.19157473588225 | -4.20732211721868  | 3.76471775952143  |
| C  | -3.59359335703270 | -4.19231925728206  | 3.40297890684380  |
| C  | -2.41014303873138 | -4.88347280450510  | 3.69808538624946  |
| N  | -4.79633011061108 | 0.06371743727000   | 4.66171529386309  |
| C  | -6.22808011309093 | 0.69818908970215   | 4.52683052575516  |
| C  | -3.82017967871752 | 0.88397318036623   | 5.62817614533113  |
| C  | -4.56504268028051 | 1.24783256587896   | 6.92005126026671  |
| C  | -3.22277262674817 | 2.16187311524575   | 5.04134872097749  |
| C  | -2.62385559661875 | 0.01873045852467   | 6.02663687098587  |
| C  | -5.88052671625709 | 1.96012655819635   | 6.70686970141533  |
| H  | -3.87492203907003 | 1.86516134436315   | 7.49736221338516  |
| H  | -4.73421265057296 | 0.35488324385458   | 7.52660918627209  |
| C  | -6.78638370286483 | 1.05499477733804   | 5.90577423184759  |
| C  | -7.19363567968500 | -0.30047566185178  | 3.88302564588874  |
| C  | -6.24356406988697 | 1.94403368932433   | 3.64702968630089  |
| H  | -6.99114425643470 | 0.14494075235941   | 6.47557218658106  |
| H  | -7.75892847269809 | 1.51907033439471   | 5.73011791077033  |
| H  | -5.72910809533317 | 2.91238166202317   | 6.19265764013482  |
| H  | -6.33784006664364 | 2.19627906274099   | 7.66969732596276  |
| C  | -4.98368589340159 | -1.25401796761878  | 5.34452865995866  |
| H  | -5.70984928155877 | -1.85152006079224  | 4.81610348849920  |
| H  | -5.30921216955298 | -1.10215106462258  | 6.36792708077960  |
| H  | -4.05098935973846 | -1.80298660222474  | 5.35308800275494  |
| H  | -2.88707534083884 | -0.80975003228832  | 6.68049775917305  |
| H  | -1.94418138282039 | 0.6606451597540    | 6.58744860238919  |
| H  | -2.07450442716712 | -0.351245803743476 | 5.16527157525133  |

|    |                   |                   |                   |
|----|-------------------|-------------------|-------------------|
| H  | -3.94427734882274 | 2.87739125066568  | 4.66737073116642  |
| H  | -2.51033138171222 | 1.96032376976905  | 4.25092196362148  |
| H  | -2.68859961831884 | 2.64600393649098  | 5.86016532152449  |
| H  | -7.22599839034101 | 2.40391908594940  | 3.75915133075460  |
| H  | -6.13717772330952 | 1.70300151390995  | 2.59427423572366  |
| H  | -5.50397093955572 | 2.69087192115752  | 3.90292510282483  |
| H  | -7.52601291498932 | -1.07288421477329 | 4.57436477391668  |
| H  | -6.79458987008506 | -0.77295553559780 | 2.98682409167748  |
| H  | -8.07912579535701 | 0.25918419571759  | 3.57988089715448  |
| Cl | 0.32668960150826  | -1.94251458203653 | 3.63029059081598  |
| Cl | 0.324617203098131 | -5.05646845625517 | 4.13699510448329  |
| Cl | -2.47593865836885 | -6.56795107173532 | 3.98895553967569  |
| Cl | -5.11547963511083 | -4.97097676279161 | 3.34446571539656  |
| Cl | -6.79888355605809 | 0.16682367295400  | -1.01457384830545 |
| Cl | -6.27822139291980 | 2.99622451121939  | -2.30789566439854 |
| Cl | -4.23704341225932 | 4.94389480850910  | -0.97864053167339 |
| Cl | -2.72085552248309 | 4.06635322441868  | 1.64214332467965  |

## [TS-N-methylpyrrole-pmp-Si(cat<sup>2-</sup>)<sub>2</sub>]<sup>‡</sup>

|    |                    |                   |                   |
|----|--------------------|-------------------|-------------------|
| C  | -6.09929100377534  | 2.78945006951128  | -0.39727077856197 |
| C  | -6.72144716985352  | 1.59913508395777  | -0.76936303127955 |
| C  | -4.91596751141841  | 2.76429267683934  | 0.35822650403730  |
| C  | -6.16867098714737  | 0.36440462679652  | -0.40207460127893 |
| C  | -4.993813064343281 | 0.34898122134065  | 0.32475503325935  |
| C  | -4.38719826111849  | 1.54265987105189  | 0.71522537390518  |
| O  | -3.30797793724841  | 1.34305689295791  | 1.48136978373659  |
| O  | -4.36273347181927  | -0.72113698101661 | 0.78285820557630  |
| Si | -2.99082493946752  | -0.30136254688611 | 1.82035661328170  |
| O  | -1.64532507118412  | 0.24172327314324  | 2.82146714068155  |
| O  | -1.93058151872374  | -1.25902375358884 | 0.89984392487274  |
| C  | -0.55566824490425  | -0.45965962457219 | 2.54497527839008  |
| C  | -0.70588768678002  | -1.31330634452258 | 1.44682537264202  |
| C  | 0.62967053921005   | -0.43653204335203 | 3.25616868859954  |
| C  | 1.68858478421337   | -1.25525885195231 | 2.84153717563746  |
| C  | 0.32601589031471   | -2.13027405027495 | 1.03525997409664  |
| C  | 1.54232825390177   | -2.09010252750587 | 1.73554501029844  |
| C  | -3.70407307679606  | -1.36193119138812 | 3.28616331582798  |
| C  | -2.70776967293205  | -2.12126279960002 | 4.03948490120310  |
| C  | -4.62228077146957  | -2.36595681627756 | 2.87730465219766  |
| N  | -4.24006463592978  | -3.55542770307674 | 3.32298413339135  |
| C  | -4.90704719159072  | -4.81054377073861 | 3.06438976633130  |
| H  | -4.23773499441286  | -5.48507976569838 | 2.53063920790998  |
| H  | -5.78537752440282  | -4.62528785174628 | 2.45081870416311  |
| H  | -5.21353278202013  | -5.27637517229838 | 4.00131699461501  |
| C  | -3.06138261659867  | -3.42528869045235 | 4.04597150538861  |
| H  | -5.48830216337581  | -2.26718813114229 | 2.24256519199008  |
| H  | -1.87222210595078  | -1.70683065693830 | 4.50213768402030  |
| H  | -2.58641000356919  | -4.29241832951063 | 4.47550661679782  |
| N  | -5.10622075515694  | 0.12449016794655  | 5.15039443576880  |
| C  | -5.90798063615679  | 1.28992249771857  | 4.59549850970999  |
| C  | -4.2708839581402   | 0.45511294110202  | 6.37520116013280  |
| C  | -5.13000058192043  | 1.17024806324026  | 7.42683988684530  |
| C  | -3.04095679299400  | 1.27937334080833  | 5.99047383155113  |
| C  | -3.74187041517261  | -0.82115340133509 | 7.0351767146118   |
| C  | -5.94167533434041  | 2.33871645203789  | 6.90100555515821  |
| H  | -4.46566783942942  | 1.49314459434658  | 8.23257243235308  |
| H  | -5.81286105934715  | 0.43994353698280  | 7.87445534285976  |
| C  | -6.76643278364722  | 1.90751165994242  | 5.70208110846058  |
| C  | -6.81741607224966  | 0.79500964582770  | 3.4696305820973   |
| C  | -5.00427501863443  | 2.36641208429708  | 3.99305379124241  |
| H  | -7.52689150341134  | 1.18705434273102  | 6.02092986263099  |
| H  | -7.30631816014843  | 2.75599952864779  | 5.27447274168445  |
| H  | -5.28616713642489  | 3.17101623732318  | 6.63562145122387  |
| H  | -6.59711790787200  | 2.71375679494330  | 7.69018205786403  |
| C  | -5.95380957528899  | -1.04108756842678 | 5.4004204225839   |
| H  | -6.53111754703053  | 1.27362950695904  | 4.51053043787555  |
| H  | -6.64445465927045  | -0.90127735563299 | 6.23484913995044  |
| H  | -5.32423481176014  | -1.90179320710415 | 5.60819857657758  |
| H  | -4.52915650694301  | 1.42947812336280  | 7.47728872037841  |
| H  | -3.07432508742630  | -0.52329869198054 | 7.84178242119397  |
| H  | -3.16938553894487  | -1.43563562985292 | 6.34209437504931  |
| H  | -2.35914294669755  | 2.32540221347188  | 5.80722015055089  |
| H  | -2.54516626351391  | 0.87838317937023  | 5.10608950421261  |
| H  | -3.2703976006800   | 1.24185156634621  | 6.81367723924520  |
| H  | -5.58915978320377  | 2.95815737917658  | 3.29004142854140  |
| H  | -4.16148747238994  | 1.95428842031301  | 3.44674918494303  |
| H  | -4.61630932052785  | 3.06086288940140  | 4.73072806856981  |
| H  | -7.65609823316153  | 0.19947828019075  | 3.82886527733064  |
| H  | -6.26648194574076  | 0.21989631727228  | 2.72434424957030  |
| H  | -7.23652884758679  | 1.65960722296097  | 2.95682772015585  |
| H  | -4.28615695173076  | -0.4867089325090  | 4.07912589730662  |
| Cl | 0.74324755623156   | 0.57225139802027  | 4.63769537710479  |

# SUPPORTING INFORMATION

|    |                   |                   |                   |
|----|-------------------|-------------------|-------------------|
| Cl | 3.16148774891039  | -1.22846521040497 | 3.71558238835144  |
| Cl | 2.84217479628593  | -3.08356673709739 | 1.22751418271361  |
| Cl | 0.08465301735695  | -3.17513502248397 | -0.29822885682264 |
| Cl | -6.92281622403290 | -1.12507184080785 | -0.79212125276954 |
| Cl | -8.17294284712952 | 1.63165947693540  | -1.67794248396753 |
| Cl | -6.77636203723204 | 4.29576377273398  | -0.85011770698532 |
| Cl | -4.12965642810267 | 4.19903163337593  | 0.85868126951671  |

## [Si(cat<sup>Cl</sup>)<sub>2</sub>···pmp]<sup>DW</sup> (van-der-Waals adduct)

|    |                   |                   |                   |
|----|-------------------|-------------------|-------------------|
| C  | -6.51794305537849 | 1.89749238983405  | -0.06703695251790 |
| C  | -7.03964820853397 | 0.61332519110078  | 0.10599859834096  |
| C  | -5.19074199476584 | 2.18146778819391  | 0.28167791761187  |
| C  | -6.24498482698936 | -0.41572688630644 | 0.62956089749044  |
| C  | -4.94237581589641 | -0.12007711176825 | 0.96979139050953  |
| C  | -4.42384898914240 | 1.15861631673178  | 0.79685626540691  |
| O  | -3.11517273179509 | 1.26754925639596  | 1.16394023125738  |
| O  | -4.03831266949678 | -1.00970726064939 | 1.47078108915224  |
| Si | -2.59518552521459 | -0.22984074780814 | 1.61134737644570  |
| O  | -1.79158469851450 | -0.34921104197703 | 3.04294524206485  |
| O  | -1.39748226096922 | -0.85422889055748 | 0.66046955619005  |
| C  | -0.55834173659779 | -0.88461216781803 | 2.79944696063948  |
| C  | -0.33900729711426 | -1.16804286515715 | 1.45642602522429  |
| C  | 0.40545953509618  | -1.13362559898446 | 3.75287726297904  |
| C  | 1.62143391113722  | -1.68694470008882 | 3.32814589325139  |
| C  | 0.85109702400148  | -1.71197890569224 | 1.02242990096488  |
| C  | 1.84132944966635  | -0.97340538679946 | 1.97873757119611  |
| N  | -5.16246672712361 | 1.67515321734591  | 4.65816925169390  |
| C  | -5.93923875324586 | 1.95226190718074  | 4.61790398288978  |
| C  | -4.29250120643417 | 0.50364002491955  | 5.86159776108852  |
| C  | -5.05989716275666 | 0.78427130225532  | 7.16181468968857  |
| C  | -3.05369675905570 | 1.40263887165841  | 5.78705463744932  |
| C  | -3.75961001907679 | -0.92779851908913 | 5.93562764304599  |
| C  | -5.75273034892012 | 2.13329339169529  | 7.15336013158418  |
| H  | -4.36628787991743 | 0.70646371661431  | 8.00395960855332  |
| H  | -5.81071450479326 | -0.00076642949120 | 7.30655594987333  |
| C  | -6.66265840804057 | 2.22916208923453  | 5.94415851365330  |
| C  | -7.00602696372918 | 1.89999924853233  | 3.52616430656464  |
| C  | -5.02797548043206 | 3.13009053970119  | 4.24159234879649  |
| H  | -7.47365908360032 | 1.50041274692474  | 6.05509877982126  |
| H  | -7.13737859884761 | 3.21312046325750  | 5.88815835199769  |
| H  | -5.01556054175677 | 2.94091181214719  | 7.14171396022095  |
| H  | -6.33180226404441 | 2.26592603507064  | 8.07064712767638  |
| C  | -5.98965847686016 | -0.49379493524704 | 4.41016383245734  |
| H  | -6.54015167025608 | -0.37297057048077 | 3.48344905247434  |
| H  | -6.72123542445313 | -0.72123501582326 | 5.20227980565362  |
| H  | -5.36464932053383 | -1.37116284285269 | 4.27333299581960  |
| H  | -4.53899247063091 | -1.65620397425100 | 6.15713352550020  |
| H  | -3.02631767191025 | -0.98393524608114 | 6.74066322444708  |
| H  | -3.25729359109536 | -1.21338500280902 | 5.01081238888518  |
| H  | -3.26099561893812 | 2.44903833418940  | 5.98410686700142  |
| H  | -2.58230182252039 | 1.32258944693414  | 4.80931717744708  |
| H  | -2.33170505283919 | 1.07615218521750  | 6.53724509307148  |
| H  | -5.63026261658865 | 3.94458252957210  | 3.83658122896872  |
| H  | -4.31283317957943 | 2.82178203706832  | 3.47885766238620  |
| H  | -4.47182637020183 | 3.53795290214576  | 5.08098724261533  |
| H  | -7.80573520364528 | 1.19289457700857  | 3.74324282292089  |
| H  | -6.56641032571962 | 1.64914592865448  | 2.56201916747206  |
| H  | -7.46110798454191 | 2.88669104491434  | 3.43646655408306  |
| Cl | 0.09656700366242  | -0.76575828230118 | 5.38741734081040  |
| Cl | 2.83852443969071  | -2.00553617471050 | 4.48253958728337  |
| Cl | 3.32702835636263  | -2.64715318817104 | 1.47574361499178  |
| Cl | 1.07003057695840  | -2.03925657301166 | -0.63532616852733 |
| Cl | -6.83577450493534 | -1.99746343919401 | 0.85949182043136  |
| Cl | -8.66616867064566 | 0.28720301852104  | -0.29726482297504 |
| Cl | -7.50389983274452 | 3.14805886255083  | -0.68173248784381 |
| Cl | -4.51298597575145 | 3.73460458154976  | 0.10895020581183  |

## Si(cat<sup>Cl</sup>)<sub>2</sub>···C<sub>4</sub>H<sub>9</sub>NCH<sub>3</sub>

|    |                   |                   |                  |
|----|-------------------|-------------------|------------------|
| C  | -4.32125661722559 | 3.60529021529790  | 0.68552638718794 |
| C  | -5.31767449374937 | 2.85039536531268  | 0.06545803336140 |
| C  | -3.42501503612231 | 3.00146433600083  | 1.57759424637032 |
| C  | -5.43969709504295 | 1.477601713598803 | 0.33174015140194 |
| C  | -4.54708963727090 | 0.89931629142587  | 1.20899222921060 |
| C  | -3.54578180286774 | 1.64864346885891  | 1.81939328087331 |
| O  | -2.78931868253082 | 0.92304484301924  | 2.64314773044024 |
| O  | -4.54120423581141 | -0.38594302515414 | 1.60259647045339 |
| Si | -3.41155779930700 | -0.68235242054040 | 2.82935041690909 |
| O  | -1.83505608424907 | -1.29576316774236 | 2.94100721357499 |
| O  | -4.06773059011961 | -2.2577202257099  | 3.01418283094048 |
| C  | -1.83796399480731 | -2.57721951442591 | 3.35039522970306 |
| C  | -3.11778593579938 | -3.12850678152860 | 3.39958330828022 |
| C  | -0.72566476679291 | -3.30624649250025 | 3.71542373983185 |

|    |                   |                   |                   |
|----|-------------------|-------------------|-------------------|
| C  | -0.90432791981170 | -4.63245675800088 | 4.13160522254775  |
| C  | -3.30665130100183 | -4.43149507205190 | 3.82289589030419  |
| C  | -2.18416336601612 | -5.18763130074527 | 4.18633053916410  |
| N  | -3.17492097779997 | 0.74987148429630  | 5.34200594136937  |
| Cl | 0.81478599779834  | -2.5671359736723  | 3.65824732351327  |
| Cl | 0.45984122771182  | -5.56059951716813 | 4.58208142090330  |
| Cl | -2.39653400794282 | -6.80127851226006 | 4.71168342969782  |
| Cl | -4.89253018429280 | -5.06425298243255 | 3.89029259179004  |
| Cl | -6.65989189677628 | 0.51723499895744  | -0.38004823881644 |
| Cl | -6.41019709653142 | 3.59333847842537  | -1.02148872444329 |
| Cl | -4.18633655651132 | 5.28147984561515  | 0.36934744999540  |
| Cl | -2.20877595953126 | 3.88654384450686  | 2.39758805442653  |
| C  | -1.7622843342687  | 0.67399151689815  | 5.64074699986894  |
| C  | -3.91857047469311 | -0.32404703099213 | 4.84014154014934  |
| C  | -3.89548609357932 | 1.85922185883423  | 5.25660121377744  |
| C  | -5.18164162740876 | 1.55906702412929  | 4.79525144224711  |
| C  | -5.22206707874566 | 0.19705446915873  | 4.58458229038170  |
| H  | -1.19229394943852 | 0.62840501907455  | 4.71244011998691  |
| H  | -1.56316689741522 | -0.21946815525421 | 6.2305526729785   |
| H  | -1.47125394290204 | 1.55308135259356  | 6.21067276106017  |
| H  | -3.4602103308273  | 2.82193184275414  | 5.477958054673260 |
| H  | -5.96941579979586 | 2.27332298948586  | 4.62212196373241  |
| H  | -3.71835796949031 | -1.30293186736187 | 5.26329979927956  |
| H  | -6.05295268761962 | -0.39525578662619 | 4.23306649287548  |

## [Si(cat<sup>Cl</sup>)<sub>2</sub>···C<sub>4</sub>H<sub>9</sub>NCH<sub>3</sub><sup>C3-pos</sup>]

|    |                   |                   |                   |
|----|-------------------|-------------------|-------------------|
| C  | -6.12579142851423 | 2.43314169853371  | 0.08604289216122  |
| C  | -6.48401401750161 | 1.34904830727022  | -0.70650337417272 |
| C  | -5.01441915472850 | 2.34586171465191  | 0.94182824920963  |
| C  | -5.73585026521078 | 0.16284658849426  | -0.66682829236200 |
| C  | -4.63685284250027 | 0.07947368850928  | 0.17098660861244  |
| C  | -4.29074414004817 | 1.17257830919278  | 0.98467499058533  |
| O  | -3.23240361748523 | 0.93224740491070  | 1.75225461823854  |
| O  | -3.83978056346337 | -0.95092258999078 | 0.31747363024813  |
| Si | -2.68152787698312 | -0.70125869882597 | 1.66973178060326  |
| O  | -1.39783690166019 | -0.25561048406799 | 2.83589144888670  |
| O  | -1.43993795515277 | -1.22715625334079 | 0.59495657579297  |
| O  | -0.2070742229937  | -0.60153330180762 | 2.40903184796591  |
| C  | -0.21967699094126 | -1.1947873239089  | 1.11947873239089  |
| C  | 0.98948317038651  | -0.46944750789249 | 3.09327962191696  |
| C  | 2.18163134434849  | -0.88616442550374 | 2.48193046627426  |
| C  | 0.94874305519524  | -1.56595898019763 | 0.51105603750520  |
| C  | 2.16435842146027  | -1.42615109898147 | 1.20115182742900  |
| C  | -3.48888715772630 | -1.93402271338975 | 2.77825830646337  |
| C  | -3.14430692883188 | -2.29901302724350 | 4.11427127852541  |
| C  | -4.59888235184971 | -2.69158852282564 | 2.46243406339540  |
| N  | -4.92891326660479 | -3.47415989170532 | 3.52399014866652  |
| C  | -5.99509673902097 | -4.43842214297469 | 3.55196062509204  |
| H  | -5.61272204778271 | -5.45890696954604 | 3.52143890618712  |
| H  | -6.63580321421637 | -4.27814325204220 | 2.68566215786862  |
| H  | -6.59871473334428 | -4.3132830363681  | 4.45367320505697  |
| C  | -4.04079799642875 | -3.24141479874975 | 4.54217948829845  |
| H  | -5.16962298250957 | -2.72697463079485 | 1.54826664697244  |
| H  | -2.32744336326200 | -1.88753177065652 | 4.68519794290034  |
| H  | -4.13181169227325 | -3.76468448278194 | 5.48119056031697  |
| Cl | 0.96863414899244  | 0.19705232989180  | 4.67529690520640  |
| Cl | 3.66765686256120  | -0.72948622631618 | 3.33321051984111  |
| Cl | 3.62655041619682  | -1.9298533916690  | 0.45008595838680  |
| Cl | 0.88100383085249  | -2.2325657875058  | -1.06874198949118 |
| Cl | -6.15453126986967 | -1.20521911482574 | -1.61835339087603 |
| Cl | -7.85647099467254 | 1.44764944759656  | -1.73800553000992 |
| Cl | -7.04519629524675 | 3.88518188919376  | 0.03773242711851  |
| Cl | -4.54314023980191 | 3.66058052878248  | 1.93972492452404  |

## [Si(cat<sup>Cl</sup>)<sub>2</sub>···C<sub>4</sub>H<sub>9</sub>NCH<sub>3</sub><sup>C2-pos</sup>]

|    |                   |                   |                   |
|----|-------------------|-------------------|-------------------|
| C  | -6.34107962790680 | 2.89269716398294  | 0.52795368722545  |
| C  | -6.75619333319765 | 1.80575707243265  | -0.23338813192901 |
| C  | -5.15503537358145 | 2.82287472292141  | 1.27762294882651  |
| C  | -5.99285684482592 | 0.62884378871165  | -0.26193664688662 |
| C  | -4.82527880287249 | 0.56599026081220  | 0.47378764845686  |
| C  | -4.41155285346152 | 1.66010019773472  | 1.24856544798608  |
| O  | -3.27092968125008 | 1.43705786843576  | 1.88456505245029  |
| O  | -3.98889845952318 | -0.44998929788032 | 0.53235907399055  |
| Si | -2.72427213992348 | -0.20980369202958 | 1.74984530285882  |
| O  | -1.22673819636407 | 0.37087219719272  | 2.48123609008082  |
| O  | -1.75770904129251 | -1.24767999715792 | 0.73759480620020  |
| C  | -0.20456690134684 | -0.40264098276079 | 2.17603310513276  |
| C  | -0.50116513701831 | -1.33555837089819 | 1.17044306509123  |
| C  | 1.06322036254538  | -0.35238497254848 | 2.72531347355901  |
| C  | 2.04255879993393  | -1.24817319144858 | 2.26873441051537  |
| C  | 0.45710059320643  | -2.21721472077660 | 0.71578291107181  |
| C  | 1.74458074474701  | -2.17227705736713 | 1.27347001636139  |

## SUPPORTING INFORMATION

---

|    |                   |                   |                   |
|----|-------------------|-------------------|-------------------|
| C  | -3.26157022883758 | -0.94494099026177 | 4.51317176194539  |
| C  | -3.91014950875759 | -1.96690794165523 | 5.23633649011901  |
| C  | -3.38249043267057 | -1.21980820109386 | 3.16133871399274  |
| N  | -4.08748766503832 | -2.39859786215722 | 3.06509509118710  |
| C  | -4.44558771752380 | -3.07947071949704 | 1.84390904631659  |
| H  | -3.61142419348354 | -3.06071540656544 | 1.14431037659942  |
| H  | -5.30218073632478 | -2.60904632193509 | 1.35951346539816  |
| H  | -4.68844296608215 | -4.11478626700745 | 2.08166755492976  |
| C  | -4.40580491061958 | -2.85113786445528 | 4.30672436392660  |
| H  | -3.99606410063904 | -2.05937861150331 | 6.30769420387356  |
| H  | -4.95001928079792 | -3.77441826234482 | 4.43037254840506  |
| Cl | 1.39268843996817  | 0.80198294174614  | 3.95043893866622  |
| Cl | 3.61695778066743  | -1.19777939566458 | 2.95572031216107  |
| Cl | 2.94376709954362  | -3.27183175932939 | 0.71971833969595  |
| Cl | 0.04115093615381  | -3.34322796219282 | -0.51124884527402 |
| Cl | -6.46869177891617 | -0.74040691805415 | -1.18273735516398 |
| Cl | -8.21094653359720 | 1.88886901275985  | -1.14456264297377 |
| Cl | -7.27891471462665 | 4.33249820538915  | 0.56193632206835  |
| Cl | -4.60861069301661 | 4.14416496262501  | 2.22513169152427  |
| H  | -2.74253290326979 | -0.08965162821016 | 4.91667735568314  |
